# Supplementary material for: The K9 lymphoma assay allows a genetic subgrouping of canine lymphomas with improved risk classification
Source: Research Square preprint supplement (doi:10.21203/rs.3.rs-3955938/v1), 2024-02-16
Supplement: Supplementary file 1 [file 08d65df04bd9c974f7886b4c.xlsx]

## Sheet: Index
Supplementary Data 1: signalment and clinical details of 257 dogs sequenced in this study.

## Sheet: BCL
Signalment and clinical details of 205 dogs with B-cell lymphoma
SAMPLE ID	DIAGNOSIS	SUBTYPE		BREED	AGE (years)	SEX	WEIGHT (kg)	STAGE	SUBSTAGE	BM INFILTRATION (%)	BM INFILTRATION (yes/no)	PB INFILTRATION (%)	LDH	PRE TREATMENT WITH STEROIDS	TREATMENT	TTP	LSS
173ORT	B-LL	AGGRESSIVE		Golden Retriever	7	M	37.7	V	a	6.2	yes	7.1	wnl	no	CH-IM	222	406
219MAL	B-LL	AGGRESSIVE		Labrador	9	FS	33.2	IV	b	0.9	no	0.9	wnl	no	CH-IM	2664	2664
188TAD	B-LL	AGGRESSIVE		rottweiler	7	M	47.8	V	b	5	yes	3	high	no	CH-IM	202	280
204FAC	B-LL	AGGRESSIVE		beagle	11	M	18.2	III	a	0.9	no	0.9	wnl	no	CH-IM	1116	1234
196BED	B-LL	AGGRESSIVE		corso	9	FS	39	V	b	66.1	yes	37.2	wnl	yes	CH	58	70
197CAM	B-LL	AGGRESSIVE		mixed	7	MC	23.3	III	a	0.9	no	0.9	wnl	no	CH	30	89
220PAN	B-LL	AGGRESSIVE		German shepherd	7	M	36.1	V	b	9.6	yes	1.2	high	yes	CH-IM	171	222
195BAN	B-LL	AGGRESSIVE		mixed	8	M	49.6	V	b	70	yes	60	wnl	yes	CH-IM	62	108
208PAN	B-SLL	INDOLENT		Labrador	7	FS	30.1	IV	a	1.9	no	1.1	high	no	CH	278	500
192RUZ	B-SLL	INDOLENT		French bulldog	7	FS	12.7	V	a	0.2	no	4.4	high	no	CH	280	345
212ANG	B-SLL	INDOLENT		mixed	11	MC	7.2	V	a	6.2	yes	1.4	high	no	CH	43	61
185MAG	B-SLL	INDOLENT		jack russel	7	M	6.5	V	a	0.7	no	21.8	wnl	no	CH	180	730
191DRU	B-SLL	INDOLENT		Welsh Corgi	7	F	12	V	a	13.2	yes	14.1	high	no	CH	226	433
180REG	B-SLL	INDOLENT		mixed	6	FS	7.4	V	a	9.2	yes	29.3	high	no	CH	168	440
186CAN	B-SLL	INDOLENT		mixed	8	FS	9	III	a	0.9	no	0.9	wnl	no	CH-IM	117	347
187FOG	B-SLL	INDOLENT		Labrador	10	M	47.2	V	a	0.6	no	1.1	wnl	yes	CH	159	160
205SPA	B-SLL	INDOLENT		Welsh Corgi	7	MC	12.6	IV	a	0.9	no	0.9	high	no	CH	55	142
198PAV	B-SLL	INDOLENT		jack russel	9	F	5.1	V	a	3	yes	4.3	high	no	CH	63	1127
199PIA	B-SLL	INDOLENT		mixed	8	M	9.6	V	a	5.2	yes	24.8	high	no	CH	12	13
170BER	BL	AGGRESSIVE		Golden Retriever	7	M	33.1	V	b	0.9	no	3	wnl	no	CH	208	298
177LAS	BL	AGGRESSIVE		Galgo	9	FS	17.3	V	a	2.2	no	4.1	wnl	no	CH-IM	217	283
178GRA	BL	AGGRESSIVE		Welsh Corgi	5	FS	15.6	V	a	0.3	no	1.3	high	no	CH	130	537
189RAS	BL	AGGRESSIVE		rottweiler	5	F	41.8	IV	a	0.7	no	0.6	wnl	no	CH	41	112
248CHI	BL	AGGRESSIVE		border collie	3	M	27.8	V	a	0.4	no	0.6	high	yes	CH	39	118
194IAS	BL	AGGRESSIVE		Bracco Italiano	6	FS	24.1	V	b	4.3	yes	8.8	high	no	CH	231	386
222SCA	BL	AGGRESSIVE		Labrador	8	M	32.1	IV	b	0.9	no	0.9	wnl	yes	CH	1	14
240DAR	BL	AGGRESSIVE		Golden Retriever	10	FS	33	V	a	6.4	yes	13.9	wnl	no	CH-IM	493	1032
257PLI	BL	AGGRESSIVE		English setter	8	MC	19.4	IV	a	0.9	no	0.2	high	no	CH	78	98
200MER	BL	AGGRESSIVE		dobermann	7	M	37.5	V	b	-	-	NV	high	yes	CH-IM	480	490
52LNI	DLBCL	AGGRESSIVE	DLBCL-CE	rottweiler	4	FS	38	III	a	0.9	no	0.9	wnl	no	CH-IM	217	298
9GAL	DLBCL	AGGRESSIVE	DLBCL-CE	chowchow	5	M	34	V	a	2.6	no	2.4	high	yes	CH-IM	251	623
44LCL	DLBCL	AGGRESSIVE	DLBCL-CE	dobermann	10	FS	33	IV	a	0.9	no	0.9	high	no	CH-IM	53	96
16PER	DLBCL	AGGRESSIVE	DLBCL-CE	dobermann	5	F	32	V	b	5.3	yes	3.7	high	yes	CH-IM	55	130
12SUG	DLBCL	AGGRESSIVE	DLBCL-CE	German shepherd	11	MC	32	IV	a	0.9	no	0.9	high	yes	CH-IM	49	82
90CAP	DLBCL	AGGRESSIVE	DLBCL-CE	Golden Retriever	10	MC	33	IV	b	0.9	no	0.9	high	yes	CH-IM	122	211
53IOR	DLBCL	AGGRESSIVE	DLBCL-CE	cocker spaniel	13	FS	17	V	a	5.9	yes	1.8	high	yes	CH-IM	60	89
15RGR	DLBCL	AGGRESSIVE	DLBCL-CE	dobermann	10	FS	37	IV	a	0.9	no	0.9	high	no	CH-IM	290	291
5	DLBCL	AGGRESSIVE	DLBCL-CE	pittbull	6	F	26	V	a	5.7	yes	25	high	no	CH-IM	197	361
8	DLBCL	AGGRESSIVE	DLBCL-CE	english setter	13	FS	20	V	a	1.7	no	6	high	no	CH-IM	275	413
13SCR	DLBCL	AGGRESSIVE	DLBCL-CE	mixed	4	M	19	V	a	6.6	yes	24.4	high	no	CH-IM	250	480
14ROM	DLBCL	AGGRESSIVE	DLBCL-CE	mixed	14	FS	13	IV	a	0.9	no	0.9	high	no	CH-IM	341	361
77BIA	DLBCL	AGGRESSIVE	DLBCL-CE	mixed	11	FS	18	V	a	1.1	no	1.5	high	no	CH-IM	346	352
7	DLBCL	AGGRESSIVE	DLBCL-CE	beagle	11	FS	12	V	b	1.5	no	0.9	high	no	CH-IM	332	625
30RCC	DLBCL	AGGRESSIVE	DLBCL-CE	chowchow	10	F	34	IV	a	0.9	no	0.9	wnl	no	CH-IM	449	450
59GBL	DLBCL	AGGRESSIVE	DLBCL-CE	bull terrier	4	FS	25	V	b	1.4	no	0.9	high	yes	CH-IM	187	196
58GLN	DLBCL	AGGRESSIVE	DLBCL-CE	Finnish hound	10	M	15	V	b	2.7	no	5.9	high	no	CH-IM	57	119
41MLT	DLBCL	AGGRESSIVE	DLBCL-CE	mixed	11	MC	15	IV	a	0.9	no	0.9	wnl	yes	CH-IM	51	69
54GBB	DLBCL	AGGRESSIVE	DLBCL-CE	English bulldog	4	FS	24	V	a	11.2	yes	39	high	no	CH-IM	162	311
36MCL	DLBCL	AGGRESSIVE	DLBCL-CE	Bernese mountain dog	7	F	39	V	a	5.1	yes	2.4	high	no	CH-IM	40	100
49LOS	DLBCL	AGGRESSIVE	DLBCL-CE	Golden Retriever	11	FS	35.8	IV	a	0.9	no	0.9	high	no	CH-IM	72	133
68DBE	DLBCL	AGGRESSIVE	DLBCL-CE	corso	7	M	54.9	V	b	83.8	yes	6.5	high	no	CH-IM	52	54
61FML	DLBCL	AGGRESSIVE	DLBCL-CE	Bernese mountain dog	10	MC	46	V	a	6.6	yes	6.5	wnl	no	CH-IM	383	383
3GIA	DLBCL	AGGRESSIVE	DLBCL-CE	mixed	10	M	6.9	III	a	0.9	no	0.9	wnl	yes	CH-IM	202	388
5MAN	DLBCL	AGGRESSIVE	DLBCL-CE	German shepherd	9	F	27	V	b	2.8	no	1.2	wnl	no	CH-IM	171	188
42TAD	DLBCL	AGGRESSIVE	DLBCL-CE	rottweiler	7	M	47.8	V	b	5	yes	3	high	no	CH-IM	202	280
60MAG	DLBCL	AGGRESSIVE	DLBCL-CE	Italian hound	5	M	17.8	V	b	27.5	yes	55.5	high	yes	CH-IM	250	669
2	DLBCL	AGGRESSIVE	DLBCL-CE	rottweiler	4	F	47.6	V	b	46.3	yes	73.8	high	yes	CH-IM	260	263
17ZNF	DLBCL	AGGRESSIVE	DLBCL-CE	miniature poodle	9	F	4.1	V	a	3.6	yes	5.7	high	no	CH	72	85
18ZMB	DLBCL	AGGRESSIVE	DLBCL-CE	dalmatian	9	MC	27.6	III	a	0.9	no	0.9	wnl	no	CH-IM	1047	1048
19ZMG	DLBCL	AGGRESSIVE	DLBCL-CE	jack russel	8	M	8.2	V	a	10.9	yes	11.5	high	no	CH	-	-
20VIL	DLBCL	AGGRESSIVE	DLBCL-CE	brittany	5	M	34	V	a	0.6	no	2.1	high	no	CH-IM	228	476
22TRT	DLBCL	AGGRESSIVE	DLBCL-CE	rottweiler	4	M	44.2	V	b	3.3	yes	1.7	high	no	CH-IM	329	401
23TOS	DLBCL	AGGRESSIVE	DLBCL-CE	English bulldog	7	M	27	V	b	60.7	yes	13.5	wnl	yes	CH-IM	192	237
26SPR	DLBCL	AGGRESSIVE	DLBCL-CE	mixed	8	M	28.8	V	a	9.3	yes	9.1	high	no	CH-IM	421	1091
27SCI	DLBCL	AGGRESSIVE	DLBCL-CE	rottweiler	9	M	53.8	IV	a	0.9	no	0.9	high	no	CH	14	15
29RSS	DLBCL	AGGRESSIVE	DLBCL-CE	Golden Retriever	9	FS	36.5	IV	a	0.3	no	0.7	high	no	CH-IM	667	667
31PST	DLBCL	AGGRESSIVE	DLBCL-CE	Irish setter	6	M	34.3	V	a	6.5	yes	8.8	wnl	no	prednisolone	42	71
32PIE	DLBCL	AGGRESSIVE	DLBCL-CE	mixed	10	FS	24.6	V	a	0.9	no	0.9	high	no	CH	-	-
35ORN	DLBCL	AGGRESSIVE	DLBCL-CE	maltese	14	FS	5.3	III	a	0.9	no	0.9	wnl	no	CH-IM	49	131
40MNO	DLBCL	AGGRESSIVE	DLBCL-CE	fox terrier	10	FS	11.6	V	a	0.1	no	1.1	wnl	no	CH-IM	378	412
51LNT	DLBCL	AGGRESSIVE	DLBCL-CE	mixed	10	MC	10	V	b	7.6	yes	12.7	high	yes	CH	1	10
55GVN	DLBCL	AGGRESSIVE	DLBCL-CE	gordon setter	10	F	23	V	a	14.9	yes	42.9	wnl	yes	CH	169	230
60FRS	DLBCL	AGGRESSIVE	DLBCL-CE	-	-	-	-	-	-	-	-	-	-	-	-	-	-
62FNT	DLBCL	AGGRESSIVE	DLBCL-CE	corso	7	F	44.6	V	b	9.7	yes	31.6	wnl	no	CH-IM	154	227
64DRG	DLBCL	AGGRESSIVE	DLBCL-CE	Labrador	11	M	40.4	V	a	7.9	yes	9.3	wnl	no	CH	14	14
65DIM	DLBCL	AGGRESSIVE	DLBCL-CE	West Highland white terrier	10	MC	8.2	V	a	6.5	yes	5.9	high	no	CH	43	154
66DVE	DLBCL	AGGRESSIVE	DLBCL-CE	beagle	5	F	11.7	V	a	0.9	no	1.5	wnl	no	CH	331	534
67DCA	DLBCL	AGGRESSIVE	DLBCL-CE	bull mastiff	6	M	49.5	III	a	0.2	no	0.3	high	yes	CH	204	375
69CUO	DLBCL	AGGRESSIVE	DLBCL-CE	French bulldog	5	M	10.6	V	a	27.8	yes	60.6	wnl	yes	CH	261	348
70CRO	DLBCL	AGGRESSIVE	DLBCL-CE	mixed	11	FS	28.9	V	a	0.8	no	1.3	high	no	CH	212	450
74CAL	DLBCL	AGGRESSIVE	DLBCL-CE	-	-	-	-	-	-	-	-	-	-	-	-	-	-
79AMA	DLBCL	AGGRESSIVE	DLBCL-CE	-	-	-	-	-	-	-	-	-	-	-	-	-	-
80BER	DLBCL	AGGRESSIVE	DLBCL-CE	saarloos wolfdog	5	FS	30.3	V	b	4.5	yes	7.3	high	no	CH-IM	70	369
81CAR	DLBCL	AGGRESSIVE	DLBCL-CE	German shepherd	9	MC	43.2	V	a	7.8	yes	17.5	high	no	CH-IM	30	152
82CHO	DLBCL	AGGRESSIVE	DLBCL-CE	amstaff	10	FS	34.9	V	a	4	yes	11.6	wnl	no	CH-IM	708	708
83FRA	DLBCL	AGGRESSIVE	DLBCL-CE	rottweiler	6	FS	35.5	V	a	8.1	yes	3.6	high	no	CH	14	14
84MAR	DLBCL	AGGRESSIVE	DLBCL-CE	Golden Retriever	10	M	33.1	V	a	1.1	no	1.4	wnl	no	CH-IM	988	1153
85STR	DLBCL	AGGRESSIVE	DLBCL-CE	Belgian sheperd	8	M	27.8	V	a	2.1	no	3.6	high	no	CH-IM	67	321
86BAS	DLBCL	AGGRESSIVE	DLBCL-CE	mixed	7	MC	26.3	V	a	1.6	no	8.3	high	no	CH-IM	272	574
88GAL	DLBCL	AGGRESSIVE	DLBCL-CE	French bulldog	8	M	13.1	V	a	3.5	yes	5.6	high	yes	CH	233	328
95CAM	DLBCL	AGGRESSIVE	DLBCL-CE	English bulldog	7	M	29.5	V	b	2	no	1.4	high	no	CH	81	117
96FUS	DLBCL	AGGRESSIVE	DLBCL-CE	Labrador	8	M	37.6	IV	a	0.3	no	0.2	wnl	no	CH-IM	56	56
89COS	DLBCL	AGGRESSIVE	DLBCL-CE	-	-	-	-	-	-	-	-	-	-	-	-	-	-
217BRE	DLBCL	AGGRESSIVE	DLBCL-CE	dobermann	5	M	33.3	V	a	13.7	yes	42	wnl	no	CH-IM	181	252
225DOB	DLBCL	AGGRESSIVE	DLBCL-CE	French bulldog	12	MC	17.6	IV	a	0.9	no	0.9	wnl	no	CH	205	205
230MAR	DLBCL	AGGRESSIVE	DLBCL-CE	rottweiler	4	M	55.7	V	a	4	yes	4	high	yes	CH-IM	176	282
233CER	DLBCL	AGGRESSIVE	DLBCL-CE	mixed	11	MC	24.7	IV	a	0.3	no	0.7	high	yes	CH-IM	244	575
239IAC	DLBCL	AGGRESSIVE	DLBCL-CE	German shepherd	9	FS	30.4	V	b	18.4	yes	2.3	wnl	no	CH-IM	197	343
247BER	DLBCL	AGGRESSIVE	DLBCL-CE	mixed	8	FS	37	V	a	1.3	no	2.3	high	no	CH-IM	275	554
250DEL	DLBCL	AGGRESSIVE	DLBCL-CE	weimaraner	7	FS	30	V	a	0.9	no	11	wnl	no	CH-IM	247	347
252NOC	DLBCL	AGGRESSIVE	DLBCL-CE	mixed	7	FS	22	V	b	15	yes	25	high	no	CH	85	85
253PIC	DLBCL	AGGRESSIVE	DLBCL-CE	mixed	7	MC	27	IV	a	0	no	0	high	no	CH	61	103
216CRI	DLBCL	AGGRESSIVE	DLBCL-CE	flat-coated retriever	3	FS	27.2	V	b	-	-	12.64	high	no	CH	10	34
258SED	DLBCL	AGGRESSIVE	DLBCL-CE	amstaff	4	F	34	IV	a	0.9	no	0.9	high	no	CH	63	199
260TAR	DLBCL	AGGRESSIVE	DLBCL-CE	mixed	11	MC	20.5	V	a	5.7	yes	16.4	high	no	CH	24	168
1ZON	DLBCL	AGGRESSIVE	DLBCL-CE	mixed	11	M	23.3	V	a	1.2	no	1.4	wnl	no	CH-IM	31	296
27GAR	DLBCL	AGGRESSIVE	DLBCL-CE	mixed	12	M	9.1	IV	a	0.9	no	0.9	high	no	CH-IM	35	63
37MNZ	DLBCL	AGGRESSIVE	DLBCL-CE	Golden Retriever	5	F	25.2	V	b	5.1	yes	4.9	high	no	CH	26	26
249DEP	DLBCL	AGGRESSIVE	DLBCL-CE	French bulldog	5	M	14.1	IV	a	0.9	no	0.1	high	no	CH-IM	218	395
254PIE	DLBCL	AGGRESSIVE	DLBCL-CE	rottweiler	5	M	-	V	-	28	yes	35.3	-	-	CH-IM	-	-
213BAS	DLBCL	AGGRESSIVE	DLBCL-CE	German shepherd	10	F	32	V	a	18.2	yes	12.6	wnl	no	CH-IM	285	345
214BOC	DLBCL	AGGRESSIVE	DLBCL-CE	amstaff	7	FS	25	V	a	2.1	no	0.9	high	no	CH-IM	202	425
215CAC	DLBCL	AGGRESSIVE	DLBCL-CE	rottweiler	6	M	45	V	a	17.5	yes	0.3	high	no	CH-IM	290	587
261TOM	DLBCL	AGGRESSIVE	DLBCL-CE	mixed	4	M	45.6	V	a	3.5	yes	10.9	high	no	CH-IM	250	270
25TAS	DLBCL	AGGRESSIVE	DLBCL-CE	jack russel	5	M	9.7	V	b	11.6	yes	53.5	wnl	no	CH-IM	49	125
78BIA	DLBCL	AGGRESSIVE	DLBCL-CE	border collie	4	M	15.9	V	a	6.4	yes	2.4	wnl	no	CH	49	340
21VSL	DLBCL	AGGRESSIVE	DLBCL-CE	-	-	-	-	-	-	-	-	-	-	-	-	-	-
259STE	DLBCL	AGGRESSIVE	DLBCL-CE	German shepherd	10	M	42	IV	a	0.9	no	0.9	high	no	CH	157	245
228KAR	DLBCL	AGGRESSIVE	DLBCL-CE	Russian toy	11	M	3.4	V	a	12	yes	55	high	yes	CH	153	153
232PAL	DLBCL	AGGRESSIVE	DLBCL-CE	dogo argentino	7	FS	36	IV	a	-	-	NV	high	yes	CH	16	16
251GAU	DLBCL	AGGRESSIVE	DLBCL-CE	Bracco Italiano	8	FS	24.3	V	b	28.8	yes	58	-	no	CH	44	44
256RIZ	DLBCL	AGGRESSIVE	DLBCL-CE	mixed	12	FS	7.4	V	b	6.8	yes	9.8	high	no	CH	203	368
262VER	DLBCL	AGGRESSIVE	DLBCL-CE	German shepherd	9	M	55.4	V	a	-	-	NV	-	no	CH	519	543
229LAN	DLBCL	AGGRESSIVE	DLBCL-CE	German shepherd	4	M	36	V	a	45.8	yes	37.3	high	no	CH-IM	236	676
231OND	DLBCL	AGGRESSIVE	DLBCL-CE	bull terrier	7	F	23.2	V	a	8.6	yes	32	-	no	CH-IM	215	355
193MAR	DLBCL	AGGRESSIVE	DLBCL-CE	mixed	6	F	18.8	V	b	4.7	yes	4.9	high	yes	CH	398	568
33PDR	DLBCL	AGGRESSIVE	DLBCL-IM	mixed	9	M	26	V	b	1.2	no	2.3	high	no	CH-IM	194	248
50LGG	DLBCL	AGGRESSIVE	DLBCL-IM	Bolognese	6	MC	6.9	V	a	-	-	10.5	wnl	no	CH	671	671
73CAV	DLBCL	AGGRESSIVE	DLBCL-IM	Welsh Corgi	6	M	17	V	b	2.3	no	2.1	high	no	CH	329	561
75BON	DLBCL	AGGRESSIVE		lakeland terrier	9	MC	13.5	IV	a	0.9	no	1.1	high	no	CH-IM	74	74
245SCH	DLBCL	AGGRESSIVE		mixed	7	MC	26.7	V	a	7.4	yes	18.6	high	no	CH-IM	335	435
1	DLBCL	AGGRESSIVE	DLBCL-CE	border collie	7	FS	21	V	a	1.3	no	3.7	wnl	no	CH-IM	228	356
29PED	DLBCL	AGGRESSIVE	DLBCL-CE	boxer	10	F	27	V	a	0.9	no	1.4	wnl	no	CH	35	150
4	DLBCL	AGGRESSIVE	DLBCL-CE	mixed	10	F	19.1	IV	a	0.9	no	0.9	high	yes	CH-IM	36	50
45LUC	DLBCL	AGGRESSIVE	DLBCL-CE	lagotto	5	FS	20.3	V	a	1.3	no	4.4	high	no	CH-IM	62	117
48LKH	DLBCL	AGGRESSIVE	DLBCL-CE	pittbull	5	F	24.8	V	a	3.9	yes	12.3	high	no	CH-IM	226	256
72CHI	DLBCL	AGGRESSIVE	DLBCL-CE	bull terrier	6	FS	-	V	a	11.3	yes	42.4	high	no	CH-IM	151	257
76BOC	DLBCL	AGGRESSIVE	DLBCL-CE	mixed	12	MC	26.7	V	a	3.2	yes	15	high	no	CH	9	10
3	DLBCL	AGGRESSIVE	DLBCL-IM	rottweiler	6	FS	40.3	IV	b	0.2	no	0.3	wnl	yes	CH-IM	160	182
24TON	DLBCL	AGGRESSIVE	DLBCL-IM	-	-	-	-	-	-	-	-	-	-	-	-	-	-
28RUG	DLBCL	AGGRESSIVE	DLBCL-IM	-	-	-	-	V	a	5	yes	3	-	no	-	-	-
38MSN	DLBCL	AGGRESSIVE	DLBCL-IM	Golden Retriever	8	M	34.9	V	a	15.1	yes	50.6	wnl	no	CH	101	101
43MST	DLBCL	AGGRESSIVE	DLBCL-IM	vizla	5	M	28	V	a	34.1	yes	49.1	high	no	CH-IM	302	415
47LOC	DLBCL	AGGRESSIVE	DLBCL-IM	mixed	11	FS	22.8	V	a	1.7	no	22.6	wnl	no	CH-IM	980	980
63VNG	DLBCL	AGGRESSIVE	DLBCL-IM	French bulldog	5	M	14.5	V	a	5	yes	7.3	high	no	CH	98	169
71COM	DLBCL	AGGRESSIVE	DLBCL-IM	mixed	11	FS	21	V	a	15.9	yes	26.1	high	no	CH	30	298
201CAR	FL	INDOLENT		mixed	8	FS	19.6	V	b	1.7	no	3.6	wnl	no	CH-IM	302	303
202MER	FL	INDOLENT		dobermann	6	MC	36.8	IV	a	0.9	no	0.9	wnl	no	CH	168	200
206SEC	FL	INDOLENT		Labrador	6	M	48	IV	b	0.9	no	0.9	wnl	no	CH-IM	524	525
207MAR	FL	INDOLENT		poodle	7	FS	8.1	V	a	0.9	no	0.9	high	no	CH-IM	826	827
218GIO	FL	INDOLENT		Labrador	11	FS	32.4	IV	a	0.9	no	0.9	wnl	yes	CH-IM	81	81
234AGO	FL	INDOLENT		dachshund	12	FS	4.2	V	a	66.2	yes	81.9	wnl	no	CH-IM	1734	1735
235MAG	FL	INDOLENT		boxer	8	M	28.7	V	a	11.7	yes	2.1	wnl	yes	CH-IM	209	359
236BEV	FL	INDOLENT		pittbull	9	FS	26.6	V	b	27	yes	87.5	wnl	no	CH-IM	168	296
237PEZ	FL	INDOLENT		cocker	3	F	12.2	V	a	21.8	yes	28.1	high	no	CH-IM	2975	2975
238LAR	FL	INDOLENT		mixed	9	MC	29.5	V	b	4.6	yes	22.2	wnl	no	CH-IM	67	87
242DON	FL	INDOLENT		German shepherd	11	M	48.8	V	b	0.9	no	0.9	wnl	no	CH	16	17
244TED	FL	INDOLENT		mixed	10	FS	13.5	IV	a	0.9	no	0.9	high	no	CH-IM	635	646
246OLA	FL	INDOLENT		cocker	4	FS	10.4	V	a	6.8	yes	8.4	high	no	CH-IM	1189	1189
97SER	FL	INDOLENT		Belgian sheperd	10	M	39.4	V	b	1.5	no	3.4	wnl	no	CH-IM	224	225
224RAC	FL	INDOLENT		pastore della Beauce	7	F	41.5	IV	a	0.9	no	0.6	high	yes	CH-IM	400	400
175APR	FL	INDOLENT		cocker	12	FS	16.2	IV	a	2	no	1.2	wnl	no	CH-IM	168	195
221PIN	FL	INDOLENT		dobermann	3	FS	38.5	V	a	1.2	no	4.8	wnl	no	CH-IM	235	364
182BAN	FL	INDOLENT		mixed	11	MC	20	V	a	0.3	no	2.4	wnl	no	CH-IM	1083	1083
181GIR	FL	INDOLENT		mixed	13	F	8.1	V	a	9.1	yes	12.7	wnl	no	CH-IM	293	294
87CAS	FL	INDOLENT		rottweiler	4	FS	43	IV	a	0.9	no	0.9	high	no	CH-IM	309	538
94GAS	FL	INDOLENT		maltese	4	FS	4	V	a	0.9	no	3.3	high	no	CH	190	392
99VIN	MZL	INDOLENT	DLBCL-IM	basset hound	7	M	31.1	V	b	18.8	yes	5.1	wnl	no	CH-IM	237	238
101ROS	MZL	INDOLENT	DLBCL-IM	mixed	9	M	36	IV	a	0.9	no	0.9	wnl	yes	CH-IM	123	156
103MAI	MZL	INDOLENT	DLBCL-IM	rottweiler	5	M	44.4	V	a	2	no	4	high	no	CH-IM	239	354
104PAG	MZL	INDOLENT	DLBCL-IM	shih-tzu	5	M	8.8	V	a	15.5	yes	15.4	high	no	CH-IM	29	152
14VOL	MZL	INDOLENT	DLBCL-IM	beagle	5	M	18.5	V	a	1.6	no	3.2	wnl	no	CH-IM	453	1321
105MAS	MZL	INDOLENT	DLBCL-IM	French bulldog	5	F	12	V	b	51.6	yes	50.7	wnl	yes	CH-IM	134	215
107MEZ	MZL	INDOLENT	DLBCL-IM	Golden Retriever	4	M	32.8	V	a	1.9	no	8.9	wnl	no	CH-IM	213	385
108BAR	MZL	INDOLENT	DLBCL-IM	mixed	6	FS	26.6	V	a	1	no	1.9	wnl	no	CH-IM	178	680
92LAI	MZL	INDOLENT	DLBCL-IM	German shepherd	8	F	38	V	a	7.7	yes	25	high	no	CH-IM	92	93
93CAR	MZL	INDOLENT	DLBCL-IM	mixed	5	F	28	V	b	22.7	yes	2.4	wnl	no	CH-IM	157	188
111ROS	MZL	INDOLENT	DLBCL-IM	mixed	9	MC	27.5	V	a	3	yes	16	wnl	yes	CH	357	560
114SCE	MZL	INDOLENT	DLBCL-IM	mixed	9	FS	10.5	IV	a	0.9	no	0.9	high	no	CH-IM	720	1400
115COT	MZL	INDOLENT	DLBCL-IM	Labrador	3	M	38	V	b	9.2	yes	32.2	high	yes	CH-IM	43	172
117VEG	MZL	INDOLENT	DLBCL-IM	mixed	13	FS	23.8	IV	b	2.3	no	0.9	high	no	CH-IM	80	105
120TOR	MZL	INDOLENT	DLBCL-IM	Golden Retriever	8	FS	27.4	V	a	2.2	no	8.1	wnl	no	CH-IM	284	832
106CIO	MZL	INDOLENT	DLBCL-IM	volpino	13	M	3	IV	a	0.9	no	0.9	high	no	CH	78	211
110COZ	MZL	INDOLENT	DLBCL-IM	Labrador	7	F	30	IV	a	0.9	no	0.9	wnl	yes	CH	1434	1458
112ALP	MZL	INDOLENT	DLBCL-IM	pinscher	11	FS	4	V	b	27	yes	35	high	yes	CH	1	7
113SIM	MZL	INDOLENT	DLBCL-IM	mixed	6	M	20.4	V	a	11.4	yes	9.8	high	no	CH	13	13
116BOR	MZL	INDOLENT	DLBCL-IM	dobermann	10	FS	32.5	V	a	1.6	no	6.1	high	no	CH	151	151
119MAZ	MZL	INDOLENT	DLBCL-IM	poodle	8	M	4.3	V	b	1.8	no	3.3	high	no	CH	60	82
179GAL	MZL	INDOLENT	DLBCL-IM	akita inu	9	MC	41.2	V	b	6.2	yes	28.6	wnl	no	CH-IM	420	939
7DEM	MZL	INDOLENT	DLBCL-IM	poodle	7	M	13.5	V	a	0.9	no	4.8	high	no	CH-IM	249	399
169MAZ	MZL	INDOLENT	DLBCL-IM	Australian shepherd	11	M	27.9	V	b	7	yes	5	high	no	CH	1	5
183FOR	MZL	INDOLENT	DLBCL-IM	mixed	5	M	9.3	V	b	18	yes	70	wnl	no	CH	55	121
184SCH	MZL	INDOLENT	DLBCL-IM	Labrador	8	MC	35.9	V	a	12.4	yes	8.6	wnl	no	CH-IM	41	113
241BEV	MZL	INDOLENT	DLBCL-IM	German shepherd	3	F	39.1	V	a	6	yes	5	wnl	no	CH	56	127
243CIO	MZL	INDOLENT	DLBCL-IM	mixed	4	M	14.1	V	b	3.7	yes	1.3	high	yes	CH-IM	133	331
9CRO	MZL	INDOLENT	DLBCL-IM	mixed	15	F	17.1	V	a	16.54	yes	5.26	high	yes	CH-IM	140	141
226FAL	MZL	INDOLENT	DLBCL-IM	mixed	12	FS	9.7	I	a	0.3	no	0.4	wnl	no	CH-IM	538	609
91GIA	MZL	INDOLENT	DLBCL-IM	akita inu	5	FS	34.9	V	a	36.3	yes	10.6	wnl	yes	CH	8	9
98CAT	MZL	INDOLENT	DLBCL-IM	mixed	13	FS	18.5	V	b	6.3	yes	0.6	wnl	no	CH	34	87
171AMO	MZL	INDOLENT	DLBCL-IM	mixed	11	FS	10.4	V	a	16	yes	13	wnl	no	CH-IM	290	713
172CIO	MZL	INDOLENT	DLBCL-IM	mixed	15	FS	18.3	V	b	1.5	no	1.6	high	no	CH	210	298
174LOG	MZL	INDOLENT	DLBCL-IM	Deutsch Kurzhaar	8	M	40	V	a	5	yes	0.9	wnl	yes	CH	179	254
223CEC	MZL	INDOLENT	DLBCL-IM	rottweiler	4	M	35.8	V	b	1.7	no	3.9	wnl	no	CH	186	326
176VIC	MZL	INDOLENT	DLBCL-IM	rottweiler	5	FS	43.3	V	a	8	yes	51.4	high	no	CH-IM	289	775
118PAT	MZL	INDOLENT	DLBCL-IM	French bulldog	8	M	12.7	V	a	0.9	no	11.1	high	no	CH-IM	259	863
FS: spayed female; MC: neutered male; BM: bone marrow; PB: peripheral blood; wnl: within normal levels; TTP: time to progression; LSS: lymphoma specific survival

## Sheet: TCL
Signalment and clinical details of 52 dogs with T-cell lymphoma
SAMPLE ID	DIAGNOSIS	SUBTYPE	BREED	AGE (years)	SEX	WEIGHT (kg)	STAGE	SUBSTAGE	BM INFILTRATION (%)	BM INFILTRATION (yes/no)	PB INFILTRATION (%)	LDH	PRE TREATMENT WITH STEROIDS	TREATMENT	TTP	LSS
153VOG	CL	aggressive	Bullterrier	11	M	22.8	V	b	0.9	no	0.9	wnl	no	CH	57	57
161PIA	CL	aggressive	Golden Retriever	7	M	30.1	V	b	0.9	no	4.9	-	no	CH	72	72
121GIO	PTCL	aggressive	Cane Corso	7	F	43.5	V	a	1.7	no	3.3	wnl	yes	CH	954	1105
122AUG	PTCL	aggressive	Boxer	5	M	41.4	V	b	2.9	no	2	high	no	CH	29	29
123GAZ	PTCL	aggressive	Mixed	9	M	8.1	V	a	3.2	no	6	wnl	no	CH	171	315
124GIO	PTCL	aggressive	German Sheperd	10	F	29.1	IV	a	0.9	no	0.9	high	no	CH	845	845
125BEQ	PTCL	aggressive	Amstaff	9	F	23.2	V	b	0.9	no	0.9	high	no	CH	32	76
126MAN	PTCL	aggressive	Springer Spaniel	5	M	20	III	b	0	no	0.1	high	no	CH	30	178
127VEN	PTCL	aggressive	Boxer	7	F	25	IV	a	0.9	no	0.9	high	no	CH	421	601
128BER	PTCL	aggressive	Cane Corso	6	M	38.6	III	a	0.9	no	0.9	high	no	CH	77	154
129MAN	PTCL	aggressive	Rhodesian Ridgeback	4	F	28.7	V	b	5.8	yes	2.1	high	no	CH	63	145
130CIM	PTCL	aggressive	Mixed	10	M	16.8	V	a	21	yes	10.3	high	no	CH	30	75
131BOE	PTCL	aggressive	Mixed	12	F	27.9	V	b	14.5	yes	22.8	wnl	yes	CH	44	63
132MAS	PTCL	aggressive	Dobermann	7	M	35.3	IV	b	0.2	no	1.8	wnl	no	CH	10	59
133BEN	PTCL	aggressive	Dogue de Bordeaux	5	M	55.9	IV	b	3.9	no	1.9	-	yes	CH	167	179
134DEP	PTCL	aggressive	German Sheperd	5	F	25.3	V	b	5.9	yes	7.4	wnl	no	CH	233	263
135DON	PTCL	aggressive	Fox Terrier	5	M	11.1	V	a	0.9	no	0.9	wnl	no	CH	29	70
137AMM	PTCL	aggressive	Rhodesian Ridgeback	6	F	31.1	IV	b	2.7	no	4.5	wnl	no	CH	162	162
138BON	PTCL	aggressive	Dogue de Bordeaux	3	M	41.5	V	b	0.9	no	0.9	wnl	no	CH	7	44
140DIZ	PTCL	aggressive	Mixed	9	M	11.6	V	a	1.5	no	6.6	wnl	no	CH	33	103
142MAZ	PTCL	aggressive	Mixed	5	F	21.5	V	b	7.6	yes	8.2	high	yes	CH	1	3
144MOR	PTCL	aggressive	Giant Schnauzer	8	M	42.4	V	b	9.4	yes	19.4	high	no	CH	25	25
147MON	PTCL	aggressive	Czechoslovakian wolfdog	9	M	37	V	b	20	yes	0	wnl	yes	CH	182	195
149SAL	PTCL	aggressive	Dogue de Bordeaux	5	F	49.2	III	a	1.1	no	3.8	wnl	no	CH	322	591
150SZU	PTCL	aggressive	Boxer	6	F	28.5	V	a	11	yes	11	-	no	CH	14	77
155PO	PTCL	aggressive	Boxer	5	M	41.3	IV	b	0.9	no	0.9	wnl	no	CH	218	375
162BEV	PTCL	aggressive	Mixed	14	M	9.9	V	b	3.1	no	2.7	wnl	no	CH	35	161
163UBE	PTCL	aggressive	Mixed	7	M	14.6	III	b	0.9	no	0.9	high	yes	CH	120	120
164BER	PTCL	aggressive	Mixed	7	F	34	V	b	1	no	1.1	wnl	yes	CH	7	12
167GUB	PTCL	aggressive	Mixed	9	M	39.6	IV	b	0.9	no	1.2	high	no	CH	35	74
209DAN	PTCL	aggressive	Mixed	10	F	24	V	a	1.9	no	2	high	no	CH	35	39
210MAN	PTCL	aggressive	Beagle	5	M	14.6	V	b	1.7	no	2.6	high	yes	prednisolone	131	147
211PED	PTCL	aggressive	Mixed	5	F	8	V	b	7.5	yes	7	high	no	CH	86	114
141LEO	T-LL	aggressive	Boxer	5	F	28.9	V	b	15.8	yes	54	high	no	CH	1	1
145ORI	T-LL	aggressive	Labrador	2	M	30.5	V	b	95	yes	62	high	no	prednisolone	1	5
151MIN	T-LL	aggressive	Mixed	11	F	38.3	V	b	81	yes	57	wnl	no	CH	8	13
159CIC	T-LL	aggressive	Mixed	7	F	8.9	III	a	0.9	no	0.9	wnl	no	CH	50	76
166BAS	T-LL	aggressive	Mixed	6	M	40.5	V	b	0	0	0.9	wnl	no	CH	60	126
168FAL	T-LL	aggressive	Beagle	10	F	13.7	V	b	4.8	yes	0.9	high	yes	CH	105	166
190BAI	T-LL	aggressive	boxer	9	M	36.9	V	b	20.6	yes	5.8	high	no	CH	21	21
152COC	T-SLL	indolent	Beagle	11	M	20.6	V	b	80	yes	90	wnl	no	CH	59	132
154SPA	T-SLL	indolent	Bernese Mountain Dog	5	M	65	V	a	17.5	yes	13.9	high	no	CH	315	362
156BAR	T-SLL	indolent	Mixed	14	M	16.4	V	b	18	yes	19	wnl	no	CH	35	153
158BUS	T-SLL	indolent	Mixed	12	F	22.9	V	a	9	yes	0.9	high	no	CH	347	498
160BET	T-SLL	indolent	Pinscher	8	F	4	V	a	1.6	no	6.6	high	no	CH	91	91
165BAL	T-SLL	indolent	Labrador	13	M	34.9	V	a	2.1	no	9.2	high	no	prednisolone	130	130
136CAM	TZL	indolent	Maltese	7	F	3.9	V	a	0.9	no	30.8	high	no	CH	1023	1023
139CHI	TZL	indolent	Wolfspitz	11	M	21.2	V	a	0.2	no	5.4	wnl	no	prednisolone	65	65
143MES	TZL	indolent	Mixed	9	M	5.4	V	a	9.8	yes	35.9	wnl	0	CH	307	330
146TAM	TZL	indolent	Cavalier king charles spaniel	10	M	10.9	III	b	0.9	no	0.9	wnl	no	CH	21	70
148MAL	TZL	indolent	Schnauzer	5	F	31	V	b	26	yes	30	high	yes	CH	28	28
157POL	TZL	indolent	Poodle	7	M	5.8	V	a	28	yes	35	wnl	no	prednisolone	77	77
BM: bone marrow; PB: peripheral blood; wnl: within normal levels; TTP: time to progression; LSS: lymphoma specific survival
