# Supplementary material for: The K9 lymphoma assay allows a genetic subgrouping of canine lymphomas with improved risk classification
Source: Research Square preprint supplement (doi:10.21203/rs.3.rs-3955938/v1), 2024-02-16
Supplement: Supplementary file 2 [file 24689ceaf591762ac8a19250.xlsx]

## Sheet: Foglio1
Supplementary Data 7: tumor mutational burden (TMB) of dogs with BCL calculated as number of mutations per megabase sequenced. Tumors in which no protein coding variants were retreived were excluded from the list.
Sample ID	TMB (mut/Mb)
2	40.8163
63VNG	40.8163
99VIN	35.7143
1	35.7143
4	35.7143
175APR	35.7143
20VIL	30.6122
26SPR	30.6122
29RSS	30.6122
41MLT	30.6122
45LUC	30.6122
52LNI	30.6122
242DON	30.6122
256RIZ	30.6122
101ROS	25.5102
106CIO	25.5102
118PAT	25.5102
86BAS	25.5102
91GIA	25.5102
95CAM	25.5102
16PER	25.5102
1ZON	25.5102
23TOS	25.5102
28RUG	25.5102
33PDR	25.5102
43MST	25.5102
51LNT	25.5102
59GBL	25.5102
5MAN	25.5102
169MAZ	25.5102
191DRU	25.5102
214BOC	25.5102
216CRI	25.5102
193MAR	25.5102
197CAM	25.5102
230MAR	25.5102
250DEL	25.5102
259STE	25.5102
104PAG	20.4082
107MEZ	20.4082
108BAR	20.4082
111ROS	20.4082
116BOR	20.4082
119MAZ	20.4082
69CUO	20.4082
74CAL	20.4082
77BIA	20.4082
78BIA	20.4082
88GAL	20.4082
93CAR	20.4082
12SUG	20.4082
17ZNF	20.4082
18ZMB	20.4082
29PED	20.4082
3	20.4082
31PST	20.4082
36MCL	20.4082
42TAD	20.4082
44LCL	20.4082
48LKH	20.4082
55GVN	20.4082
60FRS	20.4082
62FNT	20.4082
9GAL	20.4082
176VIC	20.4082
178GRA	20.4082
180REG	20.4082
192RUZ	20.4082
7DEM	20.4082
194IAS	20.4082
223CEC	20.4082
228KAR	20.4082
232PAL	20.4082
241BEV	20.4082
248CHI	20.4082
251GAU	20.4082
252NOC	20.4082
262VER	20.4082
110COZ	15.3061
113SIM	15.3061
120TOR	15.3061
66DVE	15.3061
68DBE	15.3061
76BOC	15.3061
79AMA	15.3061
80BER	15.3061
81CAR	15.3061
83FRA	15.3061
85STR	15.3061
89COS	15.3061
94GAS	15.3061
9CRO	15.3061
13SCR	15.3061
21VSL	15.3061
27SCI	15.3061
30RCC	15.3061
32PIE	15.3061
37MNZ	15.3061
3GIA	15.3061
40MNO	15.3061
49LOS	15.3061
50LGG	15.3061
53IOR	15.3061
54GBB	15.3061
61FML	15.3061
8	15.3061
171AMO	15.3061
172CIO	15.3061
174LOG	15.3061
184SCH	15.3061
189RAS	15.3061
201CAR	15.3061
204FAC	15.3061
205SPA	15.3061
213BAS	15.3061
215CAC	15.3061
195BAN	15.3061
199PIA	15.3061
220PAN	15.3061
226FAL	15.3061
229LAN	15.3061
235MAG	15.3061
237PEZ	15.3061
239IAC	15.3061
245SCH	15.3061
258SED	15.3061
261TOM	15.3061
105MAS	10.2041
114SCE	10.2041
117VEG	10.2041
14VOL	10.2041
65DIM	10.2041
72CHI	10.2041
87CAS	10.2041
92LAI	10.2041
97SER	10.2041
98CAT	10.2041
14ROM	10.2041
19ZMG	10.2041
22TRT	10.2041
27GAR	10.2041
35ORN	10.2041
47LOC	10.2041
5	10.2041
58GLN	10.2041
60MAG	10.2041
64DRG	10.2041
24TON	10.2041
177LAS	10.2041
181GIR	10.2041
182BAN	10.2041
187FOG	10.2041
202MER	10.2041
207MAR	10.2041
217BRE	10.2041
221PIN	10.2041
222SCA	10.2041
234AGO	10.2041
240DAR	10.2041
247BER	10.2041
249DEP	10.2041
103MAI	5.10204
70CRO	5.10204
73CAV	5.10204
84MAR	5.10204
90CAP	5.10204
112ALP	5.10204
82CHO	5.10204
96FUS	5.10204
15RGR	5.10204
25TAS	5.10204
38MSN	5.10204
170BER	5.10204
183FOR	5.10204
185MAG	5.10204
186CAN	5.10204
188TAD	5.10204
206SEC	5.10204
208PAN	5.10204
212ANG	5.10204
196BED	5.10204
224RAC	5.10204
231OND	5.10204
233CER	5.10204
238LAR	5.10204
243CIO	5.10204
244TED	5.10204
246OLA	5.10204
254PIE	5.10204
260TAR	5.10204
