# Supplementary material for: The K9 lymphoma assay allows a genetic subgrouping of canine lymphomas with improved risk classification
Source: Research Square preprint supplement (doi:10.21203/rs.3.rs-3955938/v1), 2024-02-16
Supplement: Supplementary file 3 [file 3da27a7b2bb6fec73ffe6bbe.xlsx]

## Sheet: Foglio1
Supplementary Data 9: putative somatic variants identified by K9 lymphoma assay in 52 TCLs
Sample ID	Diagnosis	Subtype	Chromosome	Start Position	End Position	Reference Allele	Tumor Allele	Hugo Symbol	Variant Type	Consequence	Variant Classification	Transcript	Exon	cDNA change	Protein change
121GIO	PTCL	aggressive	chr15	50194595	50194595	C	T	FBXW7	SNP	exonic	Missense_Mutation	ENSCAFT00000012962.5	exon8	c.G1535A	p.R512H
122AUG	PTCL	aggressive	chr23	24623350	24623350	T	A	SATB1	SNP	exonic	Missense_Mutation	ENSCAFT00000009427.5	exon5	c.T609A	p.S203R
122AUG	PTCL	aggressive	chr27	22258077	22258077	A	G	KRAS	SNP	UTR5	5'UTR	-	-	-	-
123GAZ	PTCL	aggressive	chr34	40599128	40599128	C	T	TBL1XR1	SNP	exonic	Missense_Mutation	ENSCAFT00000024648.5	exon6	c.G511A	p.E171K
123GAZ	PTCL	aggressive	chr23	24651976	24651976	A	G	SATB1	SNP	exonic	Missense_Mutation	ENSCAFT00000009427.5	exon8	c.A1259G	p.Q420R
123GAZ	PTCL	aggressive	chr14	11012115	11012123	TGCACATGC	T	POT1	NA	UTR5	5'UTR	-	-	-	-
123GAZ	PTCL	aggressive	chr5	32563073	32563073	C	T	TP53	SNP	exonic	Missense_Mutation	ENSCAFT00000086831.1	exon6	c.G695A	p.R232H
123GAZ	PTCL	aggressive	chr2	53520326	53520326	G	A	PIK3R1	SNP	intronic	Intron	-	-	-	-
123GAZ	PTCL	aggressive	chr3	21071221	21071221	G	GTAAC	RASA1	NA	UTR3	3'UTR	-	-	-	-
123GAZ	PTCL	aggressive	chr14	11056584	11056584	T	C	POT1	SNP	exonic	Silent	ENSCAFT00000080986.1	exon11	c.T1077C	p.L359L
124GIO	PTCL	aggressive	chr5	32563040	32563040	G	A	TP53	SNP	exonic	Missense_Mutation	ENSCAFT00000086831.1	exon6	c.C728T	p.P243L
125BEQ	PTCL	aggressive	chr3	21085282	21085282	C	T	CCNH	SNP	intronic	Intron	-	-	-	-
125BEQ	PTCL	aggressive	chr5	32564687	32564687	A	AG	TP53	NA	exonic	Frame_Shift_Ins	ENSCAFT00000086831.1	exon2	c.147delinsCT	p.G50Wfs*79
126MAN	PTCL	aggressive	chr26	10023121	10023121	T	A	PTPN11	SNP	intronic	Intron	-	-	-	-
126MAN	PTCL	aggressive	chr19	15330599	15330599	T	A	FAT4	SNP	exonic	Missense_Mutation	ENSCAFT00000006363.5	exon1	c.A1447T	p.N483Y
127VEN	PTCL	aggressive	chr27	22258077	22258077	A	G	KRAS	SNP	UTR5	5'UTR	-	-	-	-
128BER	PTCL	aggressive	chr27	5548568	5548568	C	T	KMT2D	SNP	exonic	Missense_Mutation	ENSCAFT00000045185.2	exon47	c.C15425T	p.P5142L
128BER	PTCL	aggressive	chr23	24622522	24622522	G	A	SATB1	SNP	intronic	Intron	-	-	-	-
128BER	PTCL	aggressive	chr15	8980033	8980033	A	C	ORC1	SNP	exonic	Missense_Mutation	ENSCAFT00000006021.4	exon5	c.A925C	p.N309H
129MAN	PTCL	aggressive	chr18	41608747	41608747	A	C	PTPRJ	SNP	intronic	Intron	-	-	-	-
129MAN	PTCL	aggressive	chr27	5552654	5552654	C	T	KMT2D	SNP	exonic	Missense_Mutation	ENSCAFT00000045185.2	exon50	c.C16909T	p.R5637C
129MAN	PTCL	aggressive	chr24	29202807	29202807	C	T	PLCG1	SNP	exonic	Silent	ENSCAFT00000014441.2	exon10	c.C819T	p.S273S
129MAN	PTCL	aggressive	chr24	29198659	29198659	C	T	PLCG1	SNP	exonic	Silent	ENSCAFT00000014441.2	exon1	c.C102T	p.F34F
130CIM	PTCL	aggressive	chr2	53516426	53516426	T	A	PIK3R1	SNP	intronic	Intron	-	-	-	-
130CIM	PTCL	aggressive	chr13	47160989	47160989	A	G	KIT	SNP	exonic	Missense_Mutation	ENSCAFT00000003274.4	exon7	c.A1187G	p.Q396R
130CIM	PTCL	aggressive	chr18	41635323	41635323	G	A	PTPRJ	SNP	upstream	5'Flank	-	-	-	-
130CIM	PTCL	aggressive	chr5	32564065	32564065	C	G	TP53	SNP	splicing	Splice_Site	-	-	-	-
130CIM	PTCL	aggressive	chr27	5541405	5541405	T	C	KMT2D	SNP	splicing	Splice_Site	-	-	-	-
131BOE	PTCL	aggressive	chr6	10214147	10214147	A	T	ARPC1A	SNP	UTR3	3'UTR	-	-	-	-
131BOE	PTCL	aggressive	chr20	41713580	41713580	T	C	SETD2	SNP	exonic	Silent	ENSCAFT00000021260.4	exon3	c.T3870C	p.Y1290Y
131BOE	PTCL	aggressive	chr20	41675690	41675690	T	C	SETD2	SNP	intronic	Intron	-	-	-	-
131BOE	PTCL	aggressive	chr20	41760465	41760465	G	A	SETD2	SNP	UTR3	3'UTR	-	-	-	-
132MAS	PTCL	aggressive	chr14	55723789	55723789	A	G	MET	SNP	UTR3	3'UTR	-	-	-	-
132MAS	PTCL	aggressive	chr14	55723779	55723779	G	C	MET	SNP	UTR3	3'UTR	-	-	-	-
132MAS	PTCL	aggressive	chr14	55723987	55723987	A	T	MET	SNP	UTR3	3'UTR	-	-	-	-
132MAS	PTCL	aggressive	chr14	55723796	55723796	A	T	MET	SNP	UTR3	3'UTR	-	-	-	-
133BEN	PTCL	aggressive	chr6	10226256	10226256	C	A	ARPC1A	SNP	exonic	Missense_Mutation	ENSCAFT00000036371.4	exon3	c.G337T	p.V113F
133BEN	PTCL	aggressive	chr18	41587712	41587712	G	C	PTPRJ	SNP	UTR3	3'UTR	-	-	-	-
134DEP	PTCL	aggressive	NA	NA	NA	NA	NA	NA	NA	NA	NA	-	-	-	-
135DON	PTCL	aggressive	chr2	53517657	53517657	G	A	PIK3R1	SNP	UTR5	5'UTR	-	-	-	-
136CAM	TZL	indolent	chr20	41711491	41711491	G	A	SETD2	SNP	exonic	Missense_Mutation	ENSCAFT00000021260.4	exon3	c.G1781A	p.G594D
136CAM	TZL	indolent	chr5	56779982	56779982	C	T	GNB1	SNP	intronic	Intron	-	-	-	-
136CAM	TZL	indolent	chr14	55699306	55699306	G	A	MET	SNP	intronic	Intron	-	-	-	-
136CAM	TZL	indolent	chr24	29207130	29207130	C	T	PLCG1	SNP	intronic	Intron	-	-	-	-
136CAM	TZL	indolent	chr2	53524163	53524163	C	T	PIK3R1	SNP	UTR3	3'UTR	-	-	-	-
137AMM	PTCL	aggressive	chr23	24651976	24651976	A	G	SATB1	SNP	exonic	Missense_Mutation	ENSCAFT00000009427.5	exon8	c.A1259G	p.Q420R
137AMM	PTCL	aggressive	chr18	41635323	41635323	G	A	PTPRJ	SNP	upstream	5'Flank	-	-	-	-
137AMM	PTCL	aggressive	chr26	37844610	37844610	A	C	PTEN	SNP	intronic	Intron	-	-	-	-
138BON	PTCL	aggressive	chr15	50417267	50417267	A	T	FBXW7	SNP	upstream	5'Flank	-	-	-	-
138BON	PTCL	aggressive	chr23	24651976	24651976	A	G	SATB1	SNP	exonic	Missense_Mutation	ENSCAFT00000009427.5	exon8	c.A1259G	p.Q420R
139CHI	TZL	indolent	chr14	55699306	55699306	G	A	MET	SNP	intronic	Intron	-	-	-	-
139CHI	TZL	indolent	chr15	8986068	8986068	A	T	ORC1	SNP	exonic	Missense_Mutation	ENSCAFT00000006021.4	exon10	c.A1664T	p.Q555L
140DIZ	PTCL	aggressive	chr9	22759958	22759958	G	GT	ERBB2	NA	UTR3	3'UTR	-	-	-	-
140DIZ	PTCL	aggressive	chr34	40656856	40656856	C	T	TBL1XR1	SNP	UTR5	5'UTR	-	-	-	-
141LEO	T-LL	aggressive	chr6	10226229	10226229	T	A	ARPC1A	SNP	exonic	Nonsense_Mutation	ENSCAFT00000036371.4	exon3	c.A364T	p.K122X
142MAZ	PTCL	aggressive	chr15	50192507	50192507	G	T	FBXW7	SNP	exonic	Missense_Mutation	ENSCAFT00000012962.5	exon9	c.C1654A	p.R552S
142MAZ	PTCL	aggressive	chr2	53516425	53516425	A	T	PIK3R1	SNP	intronic	Intron	-	-	-	-
142MAZ	PTCL	aggressive	chr6	10214147	10214147	A	T	ARPC1A	SNP	UTR3	3'UTR	-	-	-	-
142MAZ	PTCL	aggressive	chr6	10217822	10217822	T	C	ARPC1A	SNP	intronic	Intron	-	-	-	-
142MAZ	PTCL	aggressive	chr19	15160595	15160595	C	T	FAT4	SNP	exonic	Missense_Mutation	ENSCAFT00000059626.1	exon16	c.G13171A	p.V4391I
142MAZ	PTCL	aggressive	chr9	18302121	18302121	A	AG	MAP3K14	NA	UTR3	3'UTR	-	-	-	-
143MES	TZL	indolent	chr14	55723990	55723998	AGGCTGGAG	A	MET	NA	UTR3	3'UTR	-	-	-	-
144MOR	PTCL	aggressive	chr2	53522037	53522037	C	G	PIK3R1	SNP	exonic	Missense_Mutation	ENSCAFT00000061673.1	exon7	c.C882G	p.N294K
144MOR	PTCL	aggressive	chr13	25202947	25202947	G	C	MYC	SNP	exonic	Missense_Mutation	ENSCAFT00000001656.4	exon2	c.G120C	p.E40D
144MOR	PTCL	aggressive	chr15	50192507	50192507	G	T	FBXW7	SNP	exonic	Missense_Mutation	ENSCAFT00000012962.5	exon9	c.C1654A	p.R552S
144MOR	PTCL	aggressive	chr14	55691224	55691225	CA	C	MET	NA	exonic	Frame_Shift_Del	ENSCAFT00000005469.3	exon15	c.3285_3286delinsC	p.I1098Ffs*5
145ORI	T-LL	aggressive	chr27	5522626	5522626	A	G	KMT2D	SNP	exonic	Missense_Mutation	ENSCAFT00000013872.6	exon3	c.A365G	p.E122G
145ORI	T-LL	aggressive	chr15	50189371	50189371	G	GCA	FBXW7	NA	exonic	Frame_Shift_Ins	ENSCAFT00000012962.5	exon11	c.2195delinsTGC	p.A732Vfs*23
145ORI	T-LL	aggressive	chr2	53516426	53516426	T	A	PIK3R1	SNP	intronic	Intron	-	-	-	-
145ORI	T-LL	aggressive	chr2	53516425	53516425	A	T	PIK3R1	SNP	intronic	Intron	-	-	-	-
145ORI	T-LL	aggressive	chr34	40656856	40656856	C	T	TBL1XR1	SNP	UTR5	5'UTR	-	-	-	-
145ORI	T-LL	aggressive	chr9	22759958	22759958	G	GT	ERBB2	NA	UTR3	3'UTR	-	-	-	-
146TAM	TZL	indolent	chr3	21072177	21072177	C	T	CCNH	SNP	intronic	Intron	-	-	-	-
147MON	PTCL	aggressive	chr27	5536325	5536325	T	TA	KMT2D	NA	exonic	Nonsense_Mutation	ENSCAFT00000045185.2	exon30	c.7636delinsTA	p.Y2546*
147MON	PTCL	aggressive	chr18	41596256	41596256	G	A	PTPRJ	SNP	exonic	Silent	ENSCAFT00000013154.4	exon20	c.C3156T	p.Y1052Y
147MON	PTCL	aggressive	chr18	41608747	41608747	A	C	PTPRJ	SNP	intronic	Intron	-	-	-	-
147MON	PTCL	aggressive	chr23	24652070	24652070	T	A	SATB1	SNP	exonic	Missense_Mutation	ENSCAFT00000009427.5	exon8	c.T1353A	p.S451R
147MON	PTCL	aggressive	chr5	32563400	32563400	C	T	TP53	SNP	exonic	Missense_Mutation	ENSCAFT00000086831.1	exon5	c.G629A	p.G210D
148MAL	TZL	indolent	NA	NA	NA	NA	NA	NA	NA	NA	NA	-	-	-	-
149SAL	PTCL	aggressive	chr19	15195273	15195273	C	T	FAT4	SNP	exonic	Missense_Mutation	ENSCAFT00000006363.5	exon9	c.G11768A	p.S3923N
149SAL	PTCL	aggressive	chr13	47463621	47463621	C	T	KDR	SNP	exonic	Missense_Mutation	ENSCAFT00000003300.4	exon15	c.G2149A	p.G717R
149SAL	PTCL	aggressive	chr15	50417267	50417267	A	T	FBXW7	SNP	upstream	5'Flank	-	-	-	-
149SAL	PTCL	aggressive	chr18	41587712	41587712	G	C	PTPRJ	SNP	UTR3	3'UTR	-	-	-	-
150SZU	PTCL	aggressive	chr9	18281915	18281915	G	A	MAP3K14	SNP	exonic	Missense_Mutation	ENSCAFT00000021854.4	exon2	c.G307A	p.A103T
150SZU	PTCL	aggressive	chr23	24651976	24651976	A	G	SATB1	SNP	exonic	Missense_Mutation	ENSCAFT00000009427.5	exon8	c.A1259G	p.Q420R
150SZU	PTCL	aggressive	chr27	5525842	5525842	G	T	KMT2D	SNP	exonic	Missense_Mutation	ENSCAFT00000013872.6	exon10	c.G2425T	p.A809S
150SZU	PTCL	aggressive	chr14	55723990	55723998	AGGCTGGAG	A	MET	NA	UTR3	3'UTR	-	-	-	-
151MIN	T-LL	aggressive	chr26	10014610	10014610	G	T	PTPN11	SNP	exonic	Missense_Mutation	ENSCAFT00000014133.4	exon3	c.G181T	p.D61Y
151MIN	T-LL	aggressive	chr2	53516425	53516425	A	T	PIK3R1	SNP	intronic	Intron	-	-	-	-
151MIN	T-LL	aggressive	chr17	52418151	52418151	C	G	NRAS	SNP	exonic	Missense_Mutation	ENSCAFT00000015144.4	exon2	c.G37C	p.G13R
151MIN	T-LL	aggressive	chr15	50194750	50194750	A	C	FBXW7	SNP	exonic	Missense_Mutation	ENSCAFT00000012962.5	exon8	c.T1380G	p.C460W
151MIN	T-LL	aggressive	chr6	10226229	10226229	T	A	ARPC1A	SNP	exonic	Nonsense_Mutation	ENSCAFT00000036371.4	exon3	c.A364T	p.K122X
152COC	T-SLL	indolent	chr9	18300383	18300383	T	C	MAP3K14	SNP	intronic	Intron	-	-	-	-
152COC	T-SLL	indolent	chr3	21071221	21071221	G	GTAAC	RASA1	NA	UTR3	3'UTR	-	-	-	-
152COC	T-SLL	indolent	chr13	47183155	47183155	T	A	KIT	SNP	intronic	Intron	-	-	-	-
153VOG	CL	aggressive	NA	NA	NA	NA	NA	NA	NA	NA	NA	-	-	-	-
154SPA	T-SLL	indolent	chr34	40587340	40587340	G	A	TBL1XR1	SNP	exonic	Missense_Mutation	ENSCAFT00000024648.5	exon11	c.C929T	p.P310L
154SPA	T-SLL	indolent	chr20	41675690	41675690	T	C	SETD2	SNP	intronic	Intron	-	-	-	-
154SPA	T-SLL	indolent	chr8	70761840	70761840	C	T	TRAF3	SNP	exonic	Nonsense_Mutation	ENSCAFT00000028719.4	exon2	c.C40T	p.Q14X
154SPA	T-SLL	indolent	chr13	25203044	25203044	C	T	MYC	SNP	exonic	Missense_Mutation	ENSCAFT00000001656.4	exon2	c.C217T	p.P73S
154SPA	T-SLL	indolent	chr34	40739301	40739301	G	A	TBL1XR1	SNP	UTR5	5'UTR	-	-	-	-
155PO	PTCL	aggressive	chr23	24651976	24651976	A	G	SATB1	SNP	exonic	Missense_Mutation	ENSCAFT00000009427.5	exon8	c.A1259G	p.Q420R
155PO	PTCL	aggressive	chr6	10226229	10226229	T	A	ARPC1A	SNP	exonic	Nonsense_Mutation	ENSCAFT00000036371.4	exon3	c.A364T	p.K122X
155PO	PTCL	aggressive	chr19	15330825	15330825	G	A	FAT4	SNP	exonic	Silent	ENSCAFT00000006363.5	exon1	c.C1221T	p.F407F
155PO	PTCL	aggressive	chr27	22258077	22258077	A	G	KRAS	SNP	UTR5	5'UTR	-	-	-	-
156BAR	T-SLL	indolent	chr13	47180560	47180560	C	T	KIT	SNP	exonic	Missense_Mutation	ENSCAFT00000003274.4	exon14	c.C2132T	p.S711F
156BAR	T-SLL	indolent	chr5	32563412	32563412	G	A	TP53	SNP	exonic	Missense_Mutation	ENSCAFT00000086831.1	exon5	c.C617T	p.S206F
156BAR	T-SLL	indolent	chr20	41712894	41712894	C	T	SETD2	SNP	exonic	Nonsense_Mutation	ENSCAFT00000021260.4	exon3	c.C3184T	p.Q1062X
156BAR	T-SLL	indolent	chr18	41635323	41635323	G	A	PTPRJ	SNP	upstream	5'Flank	-	-	-	-
156BAR	T-SLL	indolent	chr13	47463621	47463621	C	T	KDR	SNP	exonic	Missense_Mutation	ENSCAFT00000003300.4	exon15	c.G2149A	p.G717R
156BAR	T-SLL	indolent	chr20	41735568	41735568	T	A	SETD2	SNP	exonic	Missense_Mutation	ENSCAFT00000021260.4	exon10	c.T5267A	p.I1756K
157POL	TZL	indolent	chr6	10214147	10214147	A	T	ARPC1A	SNP	UTR3	3'UTR	-	-	-	-
157POL	TZL	indolent	chr14	55627538	55627538	C	T	MET	SNP	exonic	Missense_Mutation	ENSCAFT00000005469.3	exon2	c.C1202T	p.A401V
157POL	TZL	indolent	chr27	5536808	5536808	C	T	KMT2D	SNP	exonic	Missense_Mutation	ENSCAFT00000045185.2	exon30	c.C8119T	p.R2707C
158BUS	T-SLL	indolent	chr27	22258077	22258077	A	G	KRAS	SNP	UTR5	5'UTR	-	-	-	-
158BUS	T-SLL	indolent	chr23	24651976	24651976	A	G	SATB1	SNP	exonic	Missense_Mutation	ENSCAFT00000009427.5	exon8	c.A1259G	p.Q420R
158BUS	T-SLL	indolent	chrX	35770529	35770529	A	G	DDX3X	SNP	exonic	Missense_Mutation	ENSCAFT00000061818.1	exon9	c.A839G	p.D280G
158BUS	T-SLL	indolent	chr34	40656856	40656856	C	T	TBL1XR1	SNP	UTR5	5'UTR	-	-	-	-
159CIC	T-LL	aggressive	chr9	22759958	22759958	G	GT	ERBB2	NA	UTR3	3'UTR	-	-	-	-
160BET	T-SLL	indolent	chr9	22776493	22776493	G	A	ERBB2	SNP	exonic	Missense_Mutation	ENSCAFT00000025936.4	exon4	c.C497T	p.T166M
161PIA	CL	aggressive	chr27	22258077	22258077	A	G	KRAS	SNP	UTR5	5'UTR	-	-	-	-
161PIA	CL	aggressive	chr15	50250969	50250969	A	G	FBXW7	SNP	intronic	Intron	-	-	-	-
161PIA	CL	aggressive	chr27	5525667	5525667	A	G	KMT2D	SNP	exonic	Silent	ENSCAFT00000013872.6	exon10	c.A2250G	p.P750P
161PIA	CL	aggressive	chr18	41635323	41635323	G	A	PTPRJ	SNP	upstream	5'Flank	-	-	-	-
162BEV	PTCL	aggressive	chr27	22258077	22258077	A	G	KRAS	SNP	UTR5	5'UTR	-	-	-	-
162BEV	PTCL	aggressive	chr24	29198659	29198659	C	T	PLCG1	SNP	exonic	Silent	ENSCAFT00000014441.2	exon1	c.C102T	p.F34F
162BEV	PTCL	aggressive	chr26	10064967	10064967	C	T	PTPN11	SNP	intronic	Intron	-	-	-	-
162BEV	PTCL	aggressive	chr13	47467577	47467577	A	G	KDR	SNP	intronic	Intron	-	-	-	-
162BEV	PTCL	aggressive	chr27	5541788	5541788	C	T	KMT2D	SNP	exonic	Silent	ENSCAFT00000045185.2	exon36	c.C11034T	p.T3678T
162BEV	PTCL	aggressive	chr20	57559971	57559971	G	A	STK11	SNP	UTR3	3'UTR	-	-	-	-
162BEV	PTCL	aggressive	chr24	29202807	29202807	C	T	PLCG1	SNP	exonic	Silent	ENSCAFT00000014441.2	exon10	c.C819T	p.S273S
163UBE	PTCL	aggressive	chr27	5547926	5547926	T	C	KMT2D	SNP	exonic	Silent	ENSCAFT00000045185.2	exon45	c.T15009C	p.G5003G
163UBE	PTCL	aggressive	chr9	22759958	22759958	G	GT	ERBB2	NA	UTR3	3'UTR	-	-	-	-
164BER	PTCL	aggressive	chr17	52415852	52415852	T	G	NRAS	SNP	exonic	Missense_Mutation	ENSCAFT00000015144.4	exon3	c.A183C	p.Q61H
164BER	PTCL	aggressive	chr34	12663046	12663046	C	T	PIK3CA	SNP	intronic	Intron	-	-	-	-
164BER	PTCL	aggressive	chr3	21072177	21072177	C	T	CCNH	SNP	intronic	Intron	-	-	-	-
165BAL	T-SLL	indolent	chr2	53516426	53516426	T	A	PIK3R1	SNP	intronic	Intron	-	-	-	-
165BAL	T-SLL	indolent	chr9	22759958	22759958	G	GT	ERBB2	NA	UTR3	3'UTR	-	-	-	-
165BAL	T-SLL	indolent	chr19	15330825	15330825	G	A	FAT4	SNP	exonic	Silent	ENSCAFT00000006363.5	exon1	c.C1221T	p.F407F
165BAL	T-SLL	indolent	chr2	53516425	53516425	A	T	PIK3R1	SNP	intronic	Intron	-	-	-	-
166BAS	T-LL	aggressive	chr23	24623350	24623350	T	A	SATB1	SNP	exonic	Missense_Mutation	ENSCAFT00000009427.5	exon5	c.T609A	p.S203R
166BAS	T-LL	aggressive	chr18	41635323	41635323	G	A	PTPRJ	SNP	upstream	5'Flank	-	-	-	-
166BAS	T-LL	aggressive	chr27	22258077	22258077	A	G	KRAS	SNP	UTR5	5'UTR	-	-	-	-
166BAS	T-LL	aggressive	chr15	50417267	50417267	A	T	FBXW7	SNP	upstream	5'Flank	-	-	-	-
167GUB	PTCL	aggressive	chr19	15195273	15195273	C	T	FAT4	SNP	exonic	Missense_Mutation	ENSCAFT00000006363.5	exon9	c.G11768A	p.S3923N
167GUB	PTCL	aggressive	chr15	50194596	50194596	G	T	FBXW7	SNP	exonic	Missense_Mutation	ENSCAFT00000012962.5	exon8	c.C1534A	p.R512S
167GUB	PTCL	aggressive	chr6	10214147	10214147	A	T	ARPC1A	SNP	UTR3	3'UTR	-	-	-	-
168FAL	T-LL	aggressive	chr19	15233111	15233111	G	A	FAT4	SNP	exonic	Missense_Mutation	ENSCAFT00000006363.5	exon5	c.C6823T	p.L2275F
168FAL	T-LL	aggressive	chr6	10214147	10214147	A	T	ARPC1A	SNP	UTR3	3'UTR	-	-	-	-
168FAL	T-LL	aggressive	chr23	24651976	24651976	A	G	SATB1	SNP	exonic	Missense_Mutation	ENSCAFT00000009427.5	exon8	c.A1259G	p.Q420R
168FAL	T-LL	aggressive	chr15	50194595	50194595	C	A	FBXW7	SNP	exonic	Missense_Mutation	ENSCAFT00000012962.5	exon8	c.G1535T	p.R512L
168FAL	T-LL	aggressive	chr3	21071221	21071221	G	GTAAC	RASA1	NA	UTR3	3'UTR	-	-	-	-
190BAI	T-LL	aggressive	chr15	50417267	50417267	A	T	FBXW7	SNP	upstream	5'Flank	-	-	-	-
190BAI	T-LL	aggressive	chr14	55598711	55598711	A	G	MET	SNP	UTR5	5'UTR	-	-	-	-
190BAI	T-LL	aggressive	chr27	22258077	22258077	A	G	KRAS	SNP	UTR5	5'UTR	-	-	-	-
190BAI	T-LL	aggressive	chr8	70790001	70790005	AACAC	A	TRAF3	NA	UTR3	3'UTR	-	-	-	-
190BAI	T-LL	aggressive	chr2	53524022	53524022	C	G	PIK3R1	SNP	UTR3	3'UTR	-	-	-	-
209DAN	PTCL	aggressive	chr15	50281988	50281988	C	G	FBXW7	SNP	exonic	Missense_Mutation	ENSCAFT00000012962.5	exon1	c.G432C	p.E144D
209DAN	PTCL	aggressive	chr27	5544166	5544166	G	A	KMT2D	SNP	exonic	Silent	ENSCAFT00000045185.2	exon38	c.G13200A	p.Q4400Q
209DAN	PTCL	aggressive	chr2	53516425	53516425	A	T	PIK3R1	SNP	intronic	Intron	-	-	-	-
209DAN	PTCL	aggressive	chr18	41608543	41608543	G	A	PTPRJ	SNP	exonic	Missense_Mutation	ENSCAFT00000013154.4	exon12	c.C2561T	p.A854V
210MAN	PTCL	aggressive	NA	NA	NA	NA	NA	NA	NA	NA	NA	-	-	-	-
211PED	PTCL	aggressive	chr27	22258443	22258443	T	C	KRAS	SNP	UTR5	5'UTR	-	-	-	-
