# Supplementary material for: The K9 lymphoma assay allows a genetic subgrouping of canine lymphomas with improved risk classification
Source: Research Square preprint supplement (doi:10.21203/rs.3.rs-3955938/v1), 2024-02-16
Supplement: Supplementary file 4 [file 4ecc2991109ad62366742545.xlsx]

## Sheet: Foglio1
Supplementary Data 5: resequencing data of 4 BCL samples previously analyzed by WES. The variants retrieved by both platforms are highlighted in green.
	Variants identified by WES						Variants identified by K9 lymphoma assay
Sample ID	Chr	Position	Ref allele	Alt allele	Gene	Consequence	Chr	Position	Ref allele	Alt allele	Gene	Consequence
1	chr14	11033603	G	A	POT1	Missense_Mutation	chr14	11033603	G	A	POT1	Missense_Mutation
1	chr20	41762923	T	-	SETD2	Frame_Shift_Del	chr19	15159841	G	A	FAT4	Missense_Mutation
1	chr34	40595655	C	T	TBL1XR1	Missense_Mutation	chr2	53520363	G	A	PIK3R1	Missense_Mutation
1	chr9	18280220	G	A	MAP3K14	Missense_Mutation	chr34	40595655	C	T	TBL1XR1	Missense_Mutation
1	chr9	18280473	TGTAAGGGCCC	-	MAP3K14	Frame_Shift_Del	chr9	18280220	G	A	MAP3K14	Translation_Start_Site
1	-	-	-	-	-	-	chr20	41762922	CT	C	SETD2	Frame_Shift_Del
1	-	-	-	-	-	-	chr26	37900607	T	TA	PTEN	Frame_Shift_Ins
2	chr13	25203044	C	A	MYC	Missense_Mutation	chr13	25203044	C	A	MYC	Missense_Mutation
2	chr14	11059660	C	T	POT1	Nonsense_Mutation	chr14	11059660	C	T	POT1	Nonsense_Mutation
2	chr8	70789205	C	T	TRAF3	Nonsense_Mutation	chr15	50417171	G	A	FBXW7	Nonsense_Mutation
2	chr9	18280225	T	A	MAP3K14	Missense_Mutation	chr8	70789205	C	T	TRAF3	Nonsense_Mutation
2	chr9	18280456	T	A	MAP3K14	Missense_Mutation	chr9	18280225	T	A	MAP3K14	Missense_Mutation
2	chrX	35762402	C	G	DDX3X	Nonsense_Mutation	chr9	18280456	T	A	MAP3K14	Missense_Mutation
2	chrX	35770529	A	G	DDX3X	Missense_Mutation	chrX	35762402	C	G	DDX3X	Nonsense_Mutation
2	-	-	-	-	-	-	chrX	35770529	A	G	DDX3X	Missense_Mutation
3	chr14	11051393	C	-	POT1	Frame_Shift_Del	chr15	50190858	A	C	FBXW7	Missense_Mutation
3	chr15	50190858	A	C	FBXW7	Missense_Mutation	chr15	50195995	A	C	FBXW7	Nonsense_Mutation
3	chr15	50195995	A	C	FBXW7	Nonsense_Mutation	chr20	41710896	C	T	SETD2	Nonsense_Mutation
3	chr20	41710896	C	T	SETD2	Nonsense_Mutation	chr8	70788106	CG	C	TRAF3	Frame_Shift_Del
3	chr5	32563056	G	A	TP53	Missense_Mutation	-	-	-	-	-	-
3	chr5	32564610	A	C	TP53	Missense_Mutation	-	-	-	-	-	-
3	chr8	70788107	G	-	TRAF3	Frame_Shift_Del	-	-	-	-	-	-
4	chr15	50192507	G	A	FBXW7	Missense_Mutation	chr15	50192507	G	A	FBXW7	Missense_Mutation
4	chr20	41769032	G	A	SETD2	Missense_Mutation	chr20	41769032	G	A	SETD2	Missense_Mutation
4	chr5	32563391	C	A	TP53	Missense_Mutation	chr5	32563391	C	A	TP53	Missense_Mutation
4	chr8	70762018	G	A	TRAF3	Missense_Mutation	chr6	10214410	A	G	ARPC1A	Missense_Mutation
4	chr8	70788125	C	T	TRAF3	Nonsense_Mutation	chr8	70762018	G	A	TRAF3	Missense_Mutation
4	-	-	-	-	-	-	chr8	70788125	C	T	TRAF3	Nonsense_Mutation
4	-	-	-	-	-	-	chr20	41762964	AAG	A	SETD2	Frame_Shift_Del
