# Supplementary material for: The K9 lymphoma assay allows a genetic subgrouping of canine lymphomas with improved risk classification
Source: Research Square preprint supplement (doi:10.21203/rs.3.rs-3955938/v1), 2024-02-16
Supplement: Supplementary file 5 [file 5dd7785c70bb78fbefff38bc.xlsx]

## Sheet: Foglio1
Supplementary Data 10: tumor mutational burden (TMB) of dogs with TCL calculated as number of mutations per megabase sequenced. Tumors in which no protein coding variants were retreived were excluded from the list.
Sample ID	TMB (mut/Mb)
156BAR	25.5102
144MOR	20.4082
151MIN	20.4082
123GAZ	15.3061
147MON	15.3061
150SZU	15.3061
154SPA	15.3061
168FAL	15.3061
128BER	10.2041
142MAZ	10.2041
145ORI	10.2041
149SAL	10.2041
155PO	10.2041
157POL	10.2041
158BUS	10.2041
167GUB	10.2041
209DAN	10.2041
121GIO	5.10204
122AUG	5.10204
124GIO	5.10204
125BEQ	5.10204
126MAN	5.10204
129MAN	5.10204
130CIM	5.10204
133BEN	5.10204
136CAM	5.10204
137AMM	5.10204
138BON	5.10204
139CHI	5.10204
141LEO	5.10204
160BET	5.10204
164BER	5.10204
166BAS	5.10204
