# Supplementary material for: The K9 lymphoma assay allows a genetic subgrouping of canine lymphomas with improved risk classification
Source: Research Square preprint supplement (doi:10.21203/rs.3.rs-3955938/v1), 2024-02-16
Supplement: Supplementary file 6 [file aca3f3fd5c926fa80d6b8969.xlsx]

## Sheet: Index
Supplementary Data 3: survival analysis of 52 dogs with TCL

## Sheet: Whole cohort
Median time to progression (TTP) and lymphoma specific survival (LSS) and survival analysis for 52 dogs with TCL.
Median TTP (days)			p-value			Hazard ratio (95% CI)	Hazard ratio (low)	Hazard ratio (high)			Median LSS (days)			p-value			Hazard ratio (95% CI)	Hazard ratio (low)	Hazard ratio (high)
			Log-rank test	Cox univariate	Cox multivariate									Log-rank test	Cox univariate	Cox multivariate
DIAGNOSIS	CL	NA	0.0413648								DIAGNOSIS	CL	57	0.0791045
	PTCL	63		0.997377		3.3252e+07	0	Inf				PTCL	145		0.440367		0.443919	0.056413	3.49324
	T-LL	50		0.997239		8.26015e+07	0	Inf				T-LL	76		0.858785		1.21629	0.140692	10.5149
	T-SLL	203		0.997429		2.35596e+07	0	Inf				T-SLL	153		0.372961		0.365891	0.0400661	3.34138
	TZL	307		0.997548		1.07551e+07	0	Inf				TZL	NA		0.170686		0.179416	0.0153609	2.09559
DIAGNOSIS_CAT	aggressive	60	0.0689893								DIAGNOSIS_CAT	aggressive	120	0.165171
	indolent	307		0.0753514	0.37207	0.474157	0.208326	1.0792				indolent	153		0.170885		0.563808	0.248271	1.28037
BREED_CAT	mixed	35	0.0141514								BREED_CAT	mixed	103	0.0506411
	pure	131		0.0166506	0.00979	0.45315	0.237054	0.866238				pure	154		0.0544705	0.020535	0.527966	0.275354	1.01233
AGE_CAT	old	91	0.175477								AGE_CAT	old	132	0.297801
	young	77		0.178953		1.56263	0.814987	2.99615				young	145		0.299972		1.39967	0.741137	2.64333
SEX	f	86	0.192945								SEX	f	102.5	0.410853
	m	77		0.196264		1.57705	0.790271	3.14714				m	147		0.412234		1.32441	0.676631	2.59236
WEIGHT_CAT	over	77	0.646852								WEIGHT_CAT	over	145	0.80304
	under	86		0.647147		1.15988	0.61461	2.18891				under	132		0.80309		1.08294	0.578918	2.02576
STAGE	III	63.5	0.32793								STAGE	III	137	0.292064
	IV	218		0.156284		0.417951	0.12512	1.39613				IV	375		0.233117		0.482002	0.145231	1.59971
	V	63		0.571537		0.774222	0.319067	1.87866				V	126		0.966467		1.01914	0.421076	2.46665
SUBSTAGE	a	307	0.00145722								SUBSTAGE	a	362	0.00089962
	b	59		0.00248939	0.00584	3.3857	1.53616	7.4621				b	120		0.00156236	0.000806	3.4564	1.60268	7.45418
BM_CAT	no	120	0.200529								BM_CAT	no	147	0.200276
	yes	63		0.203767		1.52568	0.795292	2.92684				yes	132		0.203519		1.52717	0.795155	2.93308
BLOOD_CAT	no	63	0.669515								BLOOD_CAT	no	145	0.8453
	yes	91		0.66976		0.86897	0.455711	1.65699				yes	132		0.845325		0.938521	0.496135	1.77537
LDH	high	86	0.616039								LDH	high	145	0.964664
	wnl	59		0.616419		1.18212	0.614281	2.27486				wnl	132		0.964665		1.0146	0.534347	1.92648
PRE.STEROID	no	63	0.931381								PRE.STEROID	no	132	0.680774
	yes	120		0.931384		0.966044	0.440033	2.12084				yes	133.5		0.681076		1.16944	0.554375	2.46691
TREATMENT	ch	63	0.477875								TREATMENT	ch	126	0.888089
	pred	131		0.4827		0.597296	0.141673	2.51821				pred	147		0.888139		0.901518	0.21261	3.82266
FBXW7	wt	91	0.388991								FBXW7	wt	145	0.327031
	mut	35		0.391811		1.46719	0.610149	3.52807				mut	39		0.330716		1.54583	0.642679	3.7182
SATB1	wt	63	0.831814								SATB1	wt	120	0.528403
	mut	171		0.831862		0.918323	0.418207	2.01651				mut	195		0.529463		0.777625	0.355072	1.70304
TBL1XR1	wt	77	0.612747								TBL1XR1	wt	126	0.534421
	mut	243		0.614726		0.6917	0.164654	2.90579				mut	338.5		0.537818		0.636285	0.151021	2.68081
TP53	wt	86	0.789885								TP53	wt	126	0.482275
	mut	103		0.790022		0.879619	0.342197	2.26107				mut	174		0.4843		0.714963	0.279214	1.83076
FAT4	wt	86	0.353531								FAT4	wt	132	0.83052
	mut	35		0.357443		1.55904	0.60549	4.01427				mut	166		0.830593		1.10853	0.431342	2.84885
KMT2D	wt	91	0.188213								KMT2D	wt	132	0.353891
	mut	63		0.194589		1.80696	0.739089	4.41773				mut	145		0.35734		1.51886	0.623736	3.69857
ORC1	wt	86	0.78395								ORC1	wt	132	0.890361
	mut	77		0.784633		0.756167	0.101879	5.61244				mut	154		0.89045		0.869046	0.117928	6.40423
KIT	wt	91	0.0881675								KIT	wt	132	0.457112
	mut	32.5		0.108374		3.35716	0.765407	14.7249				mut	114		0.462555		1.71683	0.405976	7.26025
ARPC1A	wt	86	0.323591								ARPC1A	wt	132	0.548694
	mut	87.5		0.329036		1.68924	0.589491	4.84067				mut	96		0.550354		1.37525	0.483332	3.91308
SETD2	wt	86	0.274259								SETD2	wt	126	0.19704
	mut	35		0.296297		0.344337	0.0465665	2.5462				mut	153		0.225155		0.290983	0.0395856	2.13893
MET	wt	77	0.34385								MET	wt	132	0.448536
	mut	NA		0.997456		3.89873e-08	0	Inf				mut	NA		0.996827		1.06834e-07	0	Inf
MYC	wt	77	0.507418								MYC	wt	132	0.591772
	mut	315		0.515065		0.515114	0.0699027	3.79588				mut	362		0.596208		0.583043	0.0792544	4.28921
PIK3R1	wt	86	0.661199								PIK3R1	wt	132	0.749293
	mut	NA		0.997141		2.95807e-07	0	Inf				mut	NA		0.997914		2.9625e-07	0	Inf
KDR	wt	86	0.860359								KDR	wt	126	0.569836
	mut	178.5		0.860453		0.879159	0.20916	3.69535				mut	372		0.572514		0.662117	0.158143	2.77216
MAP3K14	wt	86	0.0380364								MAP3K14	wt	145	0.413988
	mut	14		0.073613		6.77188	0.832952	55.0552				mut	77		0.426873		2.26662	0.301127	17.0611
NRAS	wt	86	7.25984e-05								NRAS	wt	145	1.17448e-05
	mut	7.5		0.00250542		13.9069	2.52313	76.6514				mut	12.5		0.0015807		18.2865	3.01416	110.942
PTPN11	wt	86	0.0108299								PTPN11	wt	145	0.00405842
	mut	8		0.0381691		9.68997	1.13187	82.9559				mut	13		0.0250738		12.2418	1.36808	109.542
TRAF3	wt	77	0.582961								TRAF3	wt	132	0.637781
	mut	315		0.587687		0.574758	0.0776334	4.25522				mut	362		0.640907		0.621604	0.0843046	4.58329
DDX3X	wt	77	0.440505								DDX3X	wt	132	0.503786
	mut	347		0.451465		0.462698	0.0622415	3.43966				mut	498		0.511583		0.51163	0.0691651	3.78465
ERBB2	wt	77	0.797366								ERBB2	wt	145	0.462159
	mut	91		0.79793		1.29899	0.175355	9.62265				mut	91		0.472247		2.09431	0.279052	15.7181
PTPRJ	wt	86	0.33508								PTPRJ	wt	145	0.0236158
	mut	35		0.353319		2.60236	0.34535	19.6099				mut	39		0.0564599		7.85264	0.944862	65.2624

## Sheet: Aggressive
Median time to progression (TTP) and lymphoma specific survival (LSS) and survival analysis for 40 dogs with aggressive TCL histotypes.
Median TTP (days)			p-value			Hazard ratio (95% CI)	Hazard ratio (low)	Hazard ratio (high)			Median LSS (days)			p-value			Hazard ratio (95% CI)	Hazard ratio (low)	Hazard ratio (high)
			Log-rank test	Cox univariate	Cox multivariate									Log-rank test	Cox univariate	Cox multivariate
DIAGNOSIS	PTCL	NA	0.0682412								DIAGNOSIS	CL	57	0.0891348
	T-LL	63		0.997024	0.9972	2.61136e+07	0	Inf				PTCL	145		0.443286	0.23412	0.443756	0.0555989	3.54179
BREED_CAT	mixed	35	0.00620103									T-LL	76		0.881329	0.75584	1.17933	0.135246	10.2837
	pure	131		0.00850306	0.0191	0.350052	0.160172	0.765029			BREED_CAT	mixed	75.5	0.00588635
AGE_CAT	old	50	0.3929									pure	166		0.00789114	0.00161	0.363776	0.17252	0.767056
	young	63		0.394691		1.36113	0.669211	2.76845			AGE_CAT	old	76	0.714915
SEX	f	56.5	0.288477									young	145		0.715097		1.13939	0.565429	2.29595
	m	60		0.2915		1.49925	0.706459	3.18173			SEX	f	95.5	0.355461
WEIGHT_CAT	over	63	0.40373									m	126		0.357586		1.40595	0.68034	2.90546
	under	50		0.405365		1.3459	0.668532	2.70959			WEIGHT_CAT	over	145	0.362546
STAGE	III	77	0.153539									under	114		0.36446		1.37713	0.689647	2.74993
	IV	218		0.262419		0.486863	0.138266	1.71434			STAGE	III	154	0.0812526
	V	44		0.637099		1.26622	0.474927	3.37591				IV	375		0.32014		0.528477	0.150309	1.8581
SUBSTAGE	a	63.5	0.122415									V	77		0.381029		1.54815	0.582273	4.1162
	b	60		0.127922	0.0775	1.9144	0.82971	4.41711			SUBSTAGE	a	128.5	0.0472714
BM_CAT	no	77	0.0733935									b	120		0.0524283	0.0736	2.30184	0.991285	5.34507
	yes	44		0.0786428		1.95082	0.926344	4.10829			BM_CAT	no	147	0.0542066
BLOOD_CAT	no	63	0.601594									yes	77		0.0594401	0.32071	2.0645	0.971554	4.38695
	yes	44		0.602159		1.21518	0.584003	2.5285			BLOOD_CAT	0	145	0.480191
LDH	high	63	0.590401									1	103		0.481399		1.2986	0.627448	2.68766
	wnl	55		0.590968		0.819548	0.396633	1.6934			LDH	high	120	0.675104
PRE.STEROID	no	50	0.655482									wnl	114.5		0.67538		0.858578	0.420586	1.75269
	yes	120		0.655908		0.831765	0.369914	1.87026			PRE.STEROID	no	103	0.810602
TREATMENT	ch	60	0.443178									yes	147		0.810674		0.906681	0.406785	2.0209
	pred	66		0.449085		1.75265	0.409912	7.49374			TREATMENT	ch	120	0.289153
ARPC1A	wt	60	0.604729									pred	76		0.300966		2.15819	0.50239	9.27122
	mut	87.5		0.60588		1.32397	0.455941	3.84455			ARPC1A	wt	120	0.770985
FAT4	wt	63	0.567151									mut	96		0.771208		1.17056	0.404964	3.38355
	mut	35		0.568391		1.32318	0.505521	3.46336			FAT4	wt	114	0.98418
FBXW7	wt	77	0.582425									mut	166		0.98418		0.99033	0.378998	2.58775
	mut	35		0.583375		1.28516	0.524319	3.15004			FBXW7	wt	126	0.490069
KDR	wt	60	0.41059									mut	39		0.491761		1.36966	0.55867	3.35791
	mut	322		0.423254		0.438612	0.058352	3.29689			KDR	wt	114	0.380913
KIT	wt	63	0.205285									mut	591		0.395418		0.41762	0.0557432	3.12875
	mut	30		0.234776		3.48143	0.444708	27.2547			KIT	wt	120	0.359275
KMT2D	wt	60	0.187183									mut	75		0.376115		2.51477	0.326298	19.3812
	mut	46.5		0.193772		1.82389	0.736798	4.51493			KMT2D	wt	120	0.380675
MAP3K14	wt	63	0.0917713									mut	111		0.38385		1.4965	0.603993	3.70785
	mut	14		0.129776		5.05289	0.621381	41.0886			MAP3K14	wt	120	0.541714
NRAS	wt	63	0.000820538									mut	77		0.54815		1.8609	0.245149	14.1259
	mut	7.5		0.00711594		10.4144	1.89039	57.3745			NRAS	wt	126	0.000194232
ORC1	wt	60	0.833018									mut	12.5		0.00438911		13.7346	2.26459	83.2994
	mut	77		0.833337		1.24122	0.165847	9.28942			ORC1	wt	114	0.976511
PTPN11	wt	63	0.0335333									mut	154		0.976512		1.03063	0.138273	7.68197
	mut	8		0.069874		7.28666	0.851024	62.3901			PTPN11	wt	120	0.0153461
PTPRJ	wt	63	0.459506									mut	13		0.0467582		9.23918	1.0324	82.6832
	mut	35		0.469845		2.11174	0.278134	16.0334			PTPRJ	wt	120	0.0355564
SATB1	wt	44	0.690706									mut	39		0.0723037		7.1673	0.836633	61.401
	mut	171		0.691062		0.840552	0.356888	1.97969			SATB1	wt	103	0.407691
TBL1XR1	wt	60	0.742315									mut	166		0.410097		0.70076	0.300689	1.63313
	mut	171		0.743466		0.715112	0.0959929	5.32733			TBL1XR1	wt	114	0.539762
TP53	wt	60	0.352386									mut	315		0.546077		0.538867	0.0723837	4.01165
	mut	171		0.357088		0.607776	0.210618	1.75385			TP53	wt	117	0.231472
												mut	195		0.238938		0.530278	0.184499	1.5241

## Sheet: Indolent
Median time to progression (TTP) and lymphoma specific survival (LSS) and survival analysis for 12 dogs with indolent TCL histotypes.
Median TTP (days)			p-value			Hazard ratio (95% CI)	Hazard ratio (low)	Hazard ratio (high)			Median LSS (days)			p-value			Hazard ratio (95% CI)	Hazard ratio (low)	Hazard ratio (high)
			Log-rank test	Cox univariate	Cox multivariate									Log-rank test	Cox univariate	Cox multivariate
DIAGNOSIS	T-SLL	203	0.435524								DIAGNOSIS	T-SLL	153	0.572433
	TZL	307		0.443093		0.523634	0.100236	2.73547				TZL	NA		0.575757		0.622282	0.11815	3.2775
BREED_CAT	mixed	307	0.648459								BREED_CAT	mixed	498	0.496614
	pure	315		0.649943		0.700853	0.150991	3.25315				pure	132		0.501687		1.77989	0.331067	9.56912
AGE_CAT	old	307	0.891425								AGE_CAT	old	153	0.327167
	young	315		0.891521		0.858606	0.096011	7.67833				young	195		0.339952		2.33494	0.409138	13.3254
SEX	f	347	0.163902								SEX	f	294.5	0.725362
	m	307		0.195623	0.67	4.26647	0.474047	38.3987				m	153		0.726239		1.36826	0.236552	7.91429
WEIGHT_CAT	over	315	0.583282								WEIGHT_CAT	over	362	0.559326
	under	199		0.588665		1.81359	0.209651	15.6884				under	153		0.563297		0.603248	0.10867	3.34875
STAGE	III	21	0.000911119								STAGE	III	70	0.0452755
	V	311		0.999028		2.78917e-10	0	Inf				V	362		0.10468	0.4108	0.100504	0.0062645	1.61242
SUBSTAGE	a	315	0.000682638								SUBSTAGE	a	498	0.00985644
	b	35		0.998886		3.46578e+09	0	Inf				b	101		0.0366063	0.0598	10.4987	1.15769	95.2093
BM_CAT	no	NA	0.509599								BM_CAT	no	91	0.748193
	yes	307		0.514599		1.73616	0.330389	9.12333				yes	362		0.74887		1.3159	0.245074	7.06557
BLOOD_CAT	0	184	0.725785								BLOOD_CAT	0	284	0.776472
	1	307		0.726564		0.733684	0.129338	4.1619				1	153		0.776903		0.78049	0.140566	4.33367
LDH	high	347	0.0389648								LDH	high	362	0.512332
	wnl	183		0.0706	0.189	8.15928	0.838297	79.4156				wnl	153		0.518247		1.81027	0.299097	10.9565
DDX3X	wt	307	0.597586								PRE.STEROID	no	153	0.0015654
	mut	347		0.601771		0.554182	0.0603773	5.08665				yes	28		0.999073		3.58586e+09	0	Inf
ERBB2	wt	315	0.396558								DDX3X	wt	153	0.619314
	mut	91		0.413713		2.5905	0.264329	25.3876				mut	498		0.622817		0.572913	0.062248	5.27293
KDR	wt	315	0.0452755								ERBB2	wt	362	0.187796
	mut	35		0.10468		9.94987	0.620186	159.63				mut	91		0.228173		4.39975	0.395314	48.9681
KIT	wt	315	0.0452755								KDR	wt	362	0.668122
	mut	35		0.10468		9.94987	0.620186	159.63				mut	153		0.67101		1.61625	0.176358	14.8123
MYC	wt	307	0.960705								KIT	wt	362	0.668122
	mut	315		0.96071		0.946003	0.103934	8.61048				mut	153		0.67101		1.61625	0.176358	14.8123
SATB1	wt	307	0.597586								MYC	wt	153	0.992552
	mut	347		0.601771		0.554182	0.0603773	5.08665				mut	362		0.992552		0.989564	0.109366	8.9538
SETD2	wt	307	0.505793								SATB1	wt	153	0.619314
	mut	35		0.513613		0.483152	0.0544744	4.28524				mut	498		0.622817		0.572913	0.062248	5.27293
TBL1XR1	wt	307	0.960705								SETD2	wt	132	0.320837
	mut	315		0.96071		0.946003	0.103934	8.61048				mut	153		0.34074		0.351405	0.0408711	3.02135
TP53	wt	315	0.0452755								TBL1XR1	wt	153	0.992552
	mut	35		0.10468		9.94987	0.620186	159.63				mut	362		0.992552		0.989564	0.109366	8.9538
TRAF3	wt	307	0.960705								TP53	wt	362	0.668122
	mut	315		0.96071		0.946003	0.103934	8.61048				mut	153		0.67101		1.61625	0.176358	14.8123
