# Supplementary material for: The K9 lymphoma assay allows a genetic subgrouping of canine lymphomas with improved risk classification
Source: Research Square preprint supplement (doi:10.21203/rs.3.rs-3955938/v1), 2024-02-16
Supplement: Supplementary file 7 [file d6c4d78ec130032a4b1d9b8a.xlsx]

## Sheet: Foglio1
Supplementary Data 6: putative somatic variants identified by K9 lymphoma assay in 205 BCLs
Sample ID	Diagnosis	Subtype	Chromosome	Start Position	End Position	Reference Allele	Tumor Allele	Hugo Symbol	Variant Type	Consequence	Variant Classification	Transcript	Exon	cDNA change	Protein change
1	DLBCL	AGGRESSIVE	chr14	11033603	11033603	G	A	POT1	SNP	exonic	Missense_Mutation	ENSCAFT00000086242.1	exon5	c.G382A	p.G128R
1	DLBCL	AGGRESSIVE	chr19	15159841	15159841	G	A	FAT4	SNP	exonic	Missense_Mutation	ENSCAFT00000059626.1	exon16	c.C13925T	p.P4642L
1	DLBCL	AGGRESSIVE	chr2	53520363	53520363	G	A	PIK3R1	SNP	exonic	Missense_Mutation	ENSCAFT00000061673.1	exon4	c.G316A	p.G106R
1	DLBCL	AGGRESSIVE	chr34	40595655	40595655	C	T	TBL1XR1	SNP	exonic	Missense_Mutation	ENSCAFT00000024648.5	exon9	c.G854A	p.G285E
1	DLBCL	AGGRESSIVE	chr9	18280220	18280220	G	A	MAP3K14	SNP	exonic	Translation_Start_Site	ENSCAFT00000021854.4	exon1	c.G3A	p.M1?
1	DLBCL	AGGRESSIVE	chr6	10213590	10213590	C	T	ARPC1A	SNP	UTR3	3'UTR	-	-	-	-
1	DLBCL	AGGRESSIVE	chr20	41762922	41762923	CT	C	SETD2	NA	exonic	Frame_Shift_Del	ENSCAFT00000021260.4	exon14	c.6132_6133delinsC	p.F2045Sfs*100
1	DLBCL	AGGRESSIVE	chr26	37900607	37900607	T	TA	PTEN	NA	exonic	Frame_Shift_Ins	ENSCAFT00000024821.4	exon5	c.449delinsTA	p.N152Efs*6
2	DLBCL	AGGRESSIVE	chr13	25203044	25203044	C	A	MYC	SNP	exonic	Missense_Mutation	ENSCAFT00000001656.4	exon2	c.C217A	p.P73T
2	DLBCL	AGGRESSIVE	chr14	11059660	11059660	C	T	POT1	SNP	exonic	Nonsense_Mutation	ENSCAFT00000080986.1	exon12	c.C1156T	p.Q386X
2	DLBCL	AGGRESSIVE	chr15	50417171	50417171	G	A	FBXW7	SNP	exonic	Nonsense_Mutation	ENSCAFT00000082966.1	exon1	c.C25T	p.R9X
2	DLBCL	AGGRESSIVE	chr8	70789205	70789205	C	T	TRAF3	SNP	exonic	Nonsense_Mutation	ENSCAFT00000085506.1	exon8	c.C1018T	p.R340X
2	DLBCL	AGGRESSIVE	chr9	18280225	18280225	T	A	MAP3K14	SNP	exonic	Missense_Mutation	ENSCAFT00000021854.4	exon1	c.T8A	p.V3E
2	DLBCL	AGGRESSIVE	chr9	18280456	18280456	T	A	MAP3K14	SNP	exonic	Missense_Mutation	ENSCAFT00000021854.4	exon1	c.T239A	p.I80N
2	DLBCL	AGGRESSIVE	chrX	35762402	35762402	C	G	DDX3X	SNP	exonic	Nonsense_Mutation	ENSCAFT00000022643.5	exon2	c.C71G	p.S24X
2	DLBCL	AGGRESSIVE	chrX	35770529	35770529	A	G	DDX3X	SNP	exonic	Missense_Mutation	ENSCAFT00000061818.1	exon9	c.A839G	p.D280G
2	DLBCL	AGGRESSIVE	chr9	22759958	22759958	G	GT	ERBB2	NA	UTR3	3'UTR	-	-	-	-
3	DLBCL	AGGRESSIVE	chr15	50190858	50190858	A	C	FBXW7	SNP	exonic	Missense_Mutation	ENSCAFT00000012962.5	exon10	c.T1809G	p.S603R
3	DLBCL	AGGRESSIVE	chr15	50195995	50195995	A	C	FBXW7	SNP	exonic	Nonsense_Mutation	ENSCAFT00000012962.5	exon7	c.T1349G	p.L450X
3	DLBCL	AGGRESSIVE	chr20	41710896	41710896	C	T	SETD2	SNP	exonic	Nonsense_Mutation	ENSCAFT00000021260.4	exon3	c.C1186T	p.R396X
3	DLBCL	AGGRESSIVE	chr9	22759958	22759958	G	GT	ERBB2	NA	UTR3	3'UTR	-	-	-	-
3	DLBCL	AGGRESSIVE	chr8	70788106	70788107	CG	C	TRAF3	NA	exonic	Frame_Shift_Del	ENSCAFT00000085506.1	exon7	c.810_811delinsC	p.V271Wfs*8
4	DLBCL	AGGRESSIVE	chr15	50192507	50192507	G	A	FBXW7	SNP	exonic	Missense_Mutation	ENSCAFT00000012962.5	exon9	c.C1654T	p.R552C
4	DLBCL	AGGRESSIVE	chr20	41769032	41769032	G	A	SETD2	SNP	exonic	Missense_Mutation	ENSCAFT00000021260.4	exon15	c.G6359A	p.R2120Q
4	DLBCL	AGGRESSIVE	chr5	32563391	32563391	C	A	TP53	SNP	exonic	Missense_Mutation	ENSCAFT00000086831.1	exon5	c.G638T	p.R213L
4	DLBCL	AGGRESSIVE	chr6	10214410	10214410	A	G	ARPC1A	SNP	exonic	Missense_Mutation	ENSCAFT00000036371.4	exon8	c.T1160C	p.M387T
4	DLBCL	AGGRESSIVE	chr8	70762018	70762018	G	A	TRAF3	SNP	exonic	Missense_Mutation	ENSCAFT00000028719.4	exon2	c.G218A	p.C73Y
4	DLBCL	AGGRESSIVE	chr8	70788125	70788125	C	T	TRAF3	SNP	exonic	Nonsense_Mutation	ENSCAFT00000085506.1	exon7	c.C829T	p.R277X
4	DLBCL	AGGRESSIVE	chr14	55598711	55598711	A	G	MET	SNP	UTR5	5'UTR	-	-	-	-
4	DLBCL	AGGRESSIVE	chr15	50214772	50214773	CA	C	FBXW7	NA	intronic	Intron	-	-	-	-
4	DLBCL	AGGRESSIVE	chr6	10214147	10214147	A	T	ARPC1A	SNP	UTR3	3'UTR	-	-	-	-
4	DLBCL	AGGRESSIVE	chr20	41762964	41762966	AAG	A	SETD2	NA	exonic	Frame_Shift_Del	ENSCAFT00000021260.4	exon14	c.6174_6176delinsA	p.D2062Pfs*8
5	DLBCL	AGGRESSIVE	chr15	50416945	50416945	C	G	FBXW7	SNP	exonic	Missense_Mutation	ENSCAFT00000082966.1	exon1	c.G251C	p.R84P
5	DLBCL	AGGRESSIVE	chr14	11053167	11053167	T	C	POT1	SNP	splicing	Splice_Site	-	-	-	-
5	DLBCL	AGGRESSIVE	chr8	70766997	70766997	T	TA	TRAF3	NA	exonic	Frame_Shift_Ins	ENSCAFT00000028719.4	exon4	c.398delinsTA	p.L134Tfs*11
7	DLBCL	AGGRESSIVE	chr15	50416599	50416599	C	A	FBXW7	SNP	exonic	Silent	ENSCAFT00000082966.1	exon1	c.G597T	p.R199R
7	DLBCL	AGGRESSIVE	chr3	21071221	21071221	G	GTAAC	RASA1	NA	UTR3	3'UTR	-	-	-	-
7	DLBCL	AGGRESSIVE	chr6	10214147	10214147	A	T	ARPC1A	SNP	UTR3	3'UTR	-	-	-	-
7	DLBCL	AGGRESSIVE	chr8	70788183	70788183	G	A	TRAF3	SNP	splicing	Splice_Site	-	-	-	-
7	DLBCL	AGGRESSIVE	chr34	40739301	40739301	G	A	TBL1XR1	SNP	UTR5	5'UTR	-	-	-	-
8	DLBCL	AGGRESSIVE	chr13	25203303	25203303	C	T	MYC	SNP	exonic	Missense_Mutation	ENSCAFT00000001656.4	exon2	c.C476T	p.S159L
8	DLBCL	AGGRESSIVE	chr14	11014692	11014692	G	A	POT1	SNP	exonic	Missense_Mutation	ENSCAFT00000086242.1	exon3	c.G178A	p.G60R
8	DLBCL	AGGRESSIVE	chr14	55598711	55598711	A	G	MET	SNP	UTR5	5'UTR	-	-	-	-
8	DLBCL	AGGRESSIVE	chr34	40582829	40582832	TTGG	T	TBL1XR1	NA	exonic	In_Frame_Del	ENSCAFT00000024648.5	exon14	c.1323_1326delinsA	p.H441del
101ROS	MZL	INDOLENT	chr15	50192507	50192507	G	A	FBXW7	SNP	exonic	Missense_Mutation	ENSCAFT00000012962.5	exon9	c.C1654T	p.R552C
101ROS	MZL	INDOLENT	chr15	50214689	50214689	G	A	FBXW7	SNP	exonic	Nonsense_Mutation	ENSCAFT00000012962.5	exon3	c.C805T	p.R269X
101ROS	MZL	INDOLENT	chr20	41713580	41713580	T	C	SETD2	SNP	exonic	Silent	ENSCAFT00000021260.4	exon3	c.T3870C	p.Y1290Y
101ROS	MZL	INDOLENT	chr5	32563904	32563904	T	C	TP53	SNP	exonic	Missense_Mutation	ENSCAFT00000086831.1	exon3	c.A428G	p.H143R
101ROS	MZL	INDOLENT	chr8	70788119	70788119	C	T	TRAF3	SNP	exonic	Nonsense_Mutation	ENSCAFT00000085506.1	exon7	c.C823T	p.Q275X
101ROS	MZL	INDOLENT	chr14	55598711	55598711	A	G	MET	SNP	UTR5	5'UTR	-	-	-	-
101ROS	MZL	INDOLENT	chr20	41675690	41675690	T	C	SETD2	SNP	intronic	Intron	-	-	-	-
101ROS	MZL	INDOLENT	chr20	57559267	57559267	C	T	CBARP	SNP	UTR3	3'UTR	-	-	-	-
101ROS	MZL	INDOLENT	chr3	21176874	21176874	G	T	CCNH	SNP	intronic	Intron	-	-	-	-
101ROS	MZL	INDOLENT	chr6	10214147	10214147	A	T	ARPC1A	SNP	UTR3	3'UTR	-	-	-	-
101ROS	MZL	INDOLENT	chr9	18284720	18284720	G	A	MAP3K14	SNP	intronic	Intron	-	-	-	-
101ROS	MZL	INDOLENT	chr9	22759958	22759958	G	GT	ERBB2	NA	UTR3	3'UTR	-	-	-	-
101ROS	MZL	INDOLENT	chr20	41762953	41762953	C	CCT	SETD2	NA	exonic	Frame_Shift_Ins	ENSCAFT00000021260.4	exon14	c.6163delinsCCT	p.N2056Lfs*90
103MAI	MZL	INDOLENT	chr14	11059694	11059694	G	A	POT1	SNP	exonic	Nonsense_Mutation	ENSCAFT00000080986.1	exon12	c.G1190A	p.W397X
103MAI	MZL	INDOLENT	chr3	21055074	21055074	T	A	CCNH	SNP	intronic	Intron	-	-	-	-
103MAI	MZL	INDOLENT	chr34	40739301	40739301	G	A	TBL1XR1	SNP	UTR5	5'UTR	-	-	-	-
104PAG	MZL	INDOLENT	chr14	11030319	11030319	G	A	POT1	SNP	exonic	Missense_Mutation	ENSCAFT00000086242.1	exon4	c.G299A	p.R100H
104PAG	MZL	INDOLENT	chr15	50190714	50190714	T	A	FBXW7	SNP	exonic	Missense_Mutation	ENSCAFT00000012962.5	exon10	c.A1953T	p.K651N
104PAG	MZL	INDOLENT	chr15	50194716	50194716	A	T	FBXW7	SNP	exonic	Missense_Mutation	ENSCAFT00000012962.5	exon8	c.T1414A	p.W472R
104PAG	MZL	INDOLENT	chr8	70788008	70788008	C	T	TRAF3	SNP	exonic	Nonsense_Mutation	ENSCAFT00000085506.1	exon7	c.C712T	p.R238X
104PAG	MZL	INDOLENT	chr14	10988230	10988230	A	C	POT1	SNP	UTR5	5'UTR	-	-	-	-
104PAG	MZL	INDOLENT	chr19	15172393	15172393	G	A	FAT4	SNP	intronic	Intron	-	-	-	-
104PAG	MZL	INDOLENT	chr9	22777577	22777577	G	A	ERBB2	SNP	intronic	Intron	-	-	-	-
104PAG	MZL	INDOLENT	chrX	35766057	35766057	C	CT	DDX3X	NA	intronic	Intron	-	-	-	-
105MAS	MZL	INDOLENT	chr15	50416599	50416599	C	A	FBXW7	SNP	exonic	Silent	ENSCAFT00000082966.1	exon1	c.G597T	p.R199R
105MAS	MZL	INDOLENT	chr34	40582768	40582768	C	A	TBL1XR1	SNP	exonic	Missense_Mutation	ENSCAFT00000024648.5	exon14	c.G1387T	p.D463Y
105MAS	MZL	INDOLENT	chr9	18280402	18280402	T	C	MAP3K14	SNP	exonic	Missense_Mutation	ENSCAFT00000021854.4	exon1	c.T185C	p.I62T
105MAS	MZL	INDOLENT	chr34	40738791	40738791	C	T	TBL1XR1	SNP	intronic	Intron	-	-	-	-
105MAS	MZL	INDOLENT	chr9	22759958	22759958	G	GT	ERBB2	NA	UTR3	3'UTR	-	-	-	-
106CIO	MZL	INDOLENT	chr13	25203044	25203044	C	T	MYC	SNP	exonic	Missense_Mutation	ENSCAFT00000001656.4	exon2	c.C217T	p.P73S
106CIO	MZL	INDOLENT	chr19	15195273	15195273	C	T	FAT4	SNP	exonic	Missense_Mutation	ENSCAFT00000006363.5	exon9	c.G11768A	p.S3923N
106CIO	MZL	INDOLENT	chr27	5544309	5544309	C	T	KMT2D	SNP	exonic	Missense_Mutation	ENSCAFT00000045185.2	exon38	c.C13343T	p.A4448V
106CIO	MZL	INDOLENT	chr5	32564747	32564747	C	T	TP53	SNP	exonic	Nonsense_Mutation	ENSCAFT00000086831.1	exon2	c.G87A	p.W29X
106CIO	MZL	INDOLENT	chr8	70767927	70767927	C	T	TRAF3	SNP	exonic	Nonsense_Mutation	ENSCAFT00000028719.4	exon5	c.C475T	p.R159X
106CIO	MZL	INDOLENT	chr14	55723789	55723789	A	G	MET	SNP	UTR3	3'UTR	-	-	-	-
106CIO	MZL	INDOLENT	chr23	24660451	24660451	G	A	SATB1	SNP	intronic	Intron	-	-	-	-
106CIO	MZL	INDOLENT	chr9	18293994	18293994	A	T	MAP3K14	SNP	intronic	Intron	-	-	-	-
107MEZ	MZL	INDOLENT	chr13	25202997	25202997	C	T	MYC	SNP	exonic	Missense_Mutation	ENSCAFT00000001656.4	exon2	c.C170T	p.A57V
107MEZ	MZL	INDOLENT	chr27	5525667	5525667	A	G	KMT2D	SNP	exonic	Silent	ENSCAFT00000013872.6	exon10	c.A2250G	p.P750P
107MEZ	MZL	INDOLENT	chr34	40582768	40582768	C	T	TBL1XR1	SNP	exonic	Missense_Mutation	ENSCAFT00000024648.5	exon14	c.G1387A	p.D463N
107MEZ	MZL	INDOLENT	chrX	35770519	35770519	C	T	DDX3X	SNP	exonic	Missense_Mutation	ENSCAFT00000061818.1	exon9	c.C829T	p.R277W
107MEZ	MZL	INDOLENT	chr9	22759958	22759958	G	GT	ERBB2	NA	UTR3	3'UTR	-	-	-	-
107MEZ	MZL	INDOLENT	chr8	70778565	70778578	GGCCCATGAGGCCA	G	TRAF3	NA	exonic	Frame_Shift_Del	ENSCAFT00000086511.1	exon7	c.672_685delinsG	p.H226Pfs*9
108BAR	MZL	INDOLENT	chr15	50194721	50194721	C	A	FBXW7	SNP	exonic	Missense_Mutation	ENSCAFT00000012962.5	exon8	c.G1409T	p.G470V
108BAR	MZL	INDOLENT	chr18	41622384	41622386	AAT	A	PTPRJ	NA	exonic	Nonsense_Mutation	ENSCAFT00000013154.4	exon6	c.1186_1188delinsT	p.I396*
108BAR	MZL	INDOLENT	chr9	18280220	18280220	G	A	MAP3K14	SNP	exonic	Translation_Start_Site	ENSCAFT00000021854.4	exon1	c.G3A	p.M1?
108BAR	MZL	INDOLENT	chr9	18280411	18280411	G	A	MAP3K14	SNP	exonic	Missense_Mutation	ENSCAFT00000021854.4	exon1	c.G194A	p.G65D
108BAR	MZL	INDOLENT	chr13	47189592	47189592	C	T	KIT	SNP	intronic	Intron	-	-	-	-
108BAR	MZL	INDOLENT	chr14	55598711	55598711	A	G	MET	SNP	UTR5	5'UTR	-	-	-	-
108BAR	MZL	INDOLENT	chr14	55723789	55723789	A	G	MET	SNP	UTR3	3'UTR	-	-	-	-
108BAR	MZL	INDOLENT	chr2	53524868	53524869	AT	A	PIK3R1	NA	UTR3	3'UTR	-	-	-	-
108BAR	MZL	INDOLENT	chr20	57559927	57559927	G	A	STK11	SNP	UTR3	3'UTR	-	-	-	-
108BAR	MZL	INDOLENT	chr23	24688032	24688034	CAG	C	SATB1	NA	UTR3	3'UTR	-	-	-	-
110COZ	MZL	INDOLENT	chr14	11059712	11059712	C	T	POT1	SNP	exonic	Missense_Mutation	ENSCAFT00000080986.1	exon12	c.C1208T	p.A403V
110COZ	MZL	INDOLENT	chrX	35770528	35770528	G	A	DDX3X	SNP	exonic	Missense_Mutation	ENSCAFT00000061818.1	exon9	c.G838A	p.D280N
110COZ	MZL	INDOLENT	chr2	53516426	53516426	T	A	PIK3R1	SNP	intronic	Intron	-	-	-	-
110COZ	MZL	INDOLENT	chr34	40656856	40656856	C	T	TBL1XR1	SNP	UTR5	5'UTR	-	-	-	-
110COZ	MZL	INDOLENT	chr9	18299198	18299198	G	A	MAP3K14	SNP	intronic	Intron	-	-	-	-
110COZ	MZL	INDOLENT	chrX	35766057	35766057	C	CT	DDX3X	NA	intronic	Intron	-	-	-	-
110COZ	MZL	INDOLENT	chr20	41719156	41719182	CAGATGTGGAAGTCATACTCACAGAAA	C	SETD2	NA	exonic	Frame_Shift_Del	ENSCAFT00000021260.4	exon5	c.4643_4669delinsC	p.D1549Efs*26
111ROS	MZL	INDOLENT	chr13	25203042	25203042	C	T	MYC	SNP	exonic	Missense_Mutation	ENSCAFT00000001656.4	exon2	c.C215T	p.P72L
111ROS	MZL	INDOLENT	chr19	15213126	15213126	C	T	FAT4	SNP	exonic	Silent	ENSCAFT00000006363.5	exon7	c.G7155A	p.L2385L
111ROS	MZL	INDOLENT	chr20	57560829	57560829	C	T	STK11	SNP	exonic	Missense_Mutation	ENSCAFT00000031055.4	exon9	c.G1160A	p.R387Q
111ROS	MZL	INDOLENT	chr8	70783008	70783008	C	T	TRAF3	SNP	exonic	Nonsense_Mutation	ENSCAFT00000085506.1	exon6	c.C664T	p.Q222X
111ROS	MZL	INDOLENT	chr18	41635323	41635323	G	A	PTPRJ	SNP	upstream	5'Flank	-	-	-	-
111ROS	MZL	INDOLENT	chr19	15332080	15332080	A	AG	FAT4	NA	upstream	5'Flank	-	-	-	-
111ROS	MZL	INDOLENT	chr26	10021969	10021969	G	A	PTPN11	SNP	intronic	Intron	-	-	-	-
111ROS	MZL	INDOLENT	chr34	40738791	40738791	C	T	TBL1XR1	SNP	intronic	Intron	-	-	-	-
111ROS	MZL	INDOLENT	chr27	5539458	5539458	T	TCAGCAG	KMT2D	NA	exonic	In_Frame_Ins	ENSCAFT00000045185.2	exon33	c.10356delinsTCAGCAG	p.Q3464_H3465insQQ
112ALP	MZL	INDOLENT	chr18	41635323	41635323	G	A	PTPRJ	SNP	upstream	5'Flank	-	-	-	-
112ALP	MZL	INDOLENT	chr2	53516367	53516367	G	C	PIK3R1	SNP	intronic	Intron	-	-	-	-
112ALP	MZL	INDOLENT	chr34	40583444	40583444	T	C	TBL1XR1	SNP	intronic	Intron	-	-	-	-
112ALP	MZL	INDOLENT	chr34	40598206	40598206	T	C	TBL1XR1	SNP	intronic	Intron	-	-	-	-
112ALP	MZL	INDOLENT	chr34	40599390	40599390	G	A	TBL1XR1	SNP	intronic	Intron	-	-	-	-
112ALP	MZL	INDOLENT	chr20	41710474	41710474	T	TATCTA	SETD2	NA	exonic	Frame_Shift_Ins	ENSCAFT00000021260.4	exon3	c.764delinsTATCTA	p.S258Lfs*8
113SIM	MZL	INDOLENT	chr13	47160935	47160935	G	A	KIT	SNP	exonic	Missense_Mutation	ENSCAFT00000003274.4	exon7	c.G1133A	p.S378N
113SIM	MZL	INDOLENT	chr5	32564003	32564003	C	T	TP53	SNP	exonic	Nonsense_Mutation	ENSCAFT00000086831.1	exon3	c.G329A	p.W110X
113SIM	MZL	INDOLENT	chr13	25200907	25200907	C	A	MYC	SNP	UTR5	5'UTR	-	-	-	-
113SIM	MZL	INDOLENT	chr13	47480442	47480442	C	T	KDR	SNP	intronic	Intron	-	-	-	-
113SIM	MZL	INDOLENT	chr16	25454628	25454629	CA	C	IDO1	NA	intergenic	IGR	-	-	-	-
113SIM	MZL	INDOLENT	chr2	53516425	53516425	A	T	PIK3R1	SNP	intronic	Intron	-	-	-	-
113SIM	MZL	INDOLENT	chr26	10041327	10041327	C	T	PTPN11	SNP	intronic	Intron	-	-	-	-
113SIM	MZL	INDOLENT	chr26	37852986	37852986	T	C	PTEN	SNP	intronic	Intron	-	-	-	-
113SIM	MZL	INDOLENT	chr9	22759958	22759958	G	GT	ERBB2	NA	UTR3	3'UTR	-	-	-	-
113SIM	MZL	INDOLENT	chrX	35766057	35766057	C	CT	DDX3X	NA	intronic	Intron	-	-	-	-
113SIM	MZL	INDOLENT	chr14	55723796	55723796	A	T	MET	SNP	UTR3	3'UTR	-	-	-	-
113SIM	MZL	INDOLENT	chr8	70761917	70761921	CAAAG	C	TRAF3	NA	exonic	Frame_Shift_Del	ENSCAFT00000028719.4	exon2	c.117_121delinsC	p.E41Gfs*3
114SCE	MZL	INDOLENT	chr20	41711064	41711064	C	T	SETD2	SNP	exonic	Nonsense_Mutation	ENSCAFT00000021260.4	exon3	c.C1354T	p.R452X
114SCE	MZL	INDOLENT	chr27	5536138	5536138	C	T	KMT2D	SNP	exonic	Silent	ENSCAFT00000045185.2	exon30	c.C7449T	p.S2483S
114SCE	MZL	INDOLENT	chr27	5542517	5542517	G	A	KMT2D	SNP	exonic	Missense_Mutation	ENSCAFT00000045185.2	exon38	c.G11551A	p.G3851S
114SCE	MZL	INDOLENT	chr14	55598821	55598821	T	C	MET	SNP	UTR5	5'UTR	-	-	-	-
114SCE	MZL	INDOLENT	chr20	41762893	41762893	G	C	SETD2	SNP	splicing	Splice_Site	-	-	-	-
114SCE	MZL	INDOLENT	chr26	9989355	9989355	C	G	PTPN11	SNP	upstream	5'Flank	-	-	-	-
114SCE	MZL	INDOLENT	chr27	22258077	22258077	A	G	KRAS	SNP	UTR5	5'UTR	-	-	-	-
114SCE	MZL	INDOLENT	chr9	22759958	22759958	G	GT	ERBB2	NA	UTR3	3'UTR	-	-	-	-
115COT	MZL	INDOLENT	chr18	41635323	41635323	G	A	PTPRJ	SNP	upstream	5'Flank	-	-	-	-
115COT	MZL	INDOLENT	chr2	53516425	53516425	A	T	PIK3R1	SNP	intronic	Intron	-	-	-	-
115COT	MZL	INDOLENT	chr9	22759958	22759958	G	GT	ERBB2	NA	UTR3	3'UTR	-	-	-	-
116BOR	MZL	INDOLENT	chr34	40595655	40595655	C	T	TBL1XR1	SNP	exonic	Missense_Mutation	ENSCAFT00000024648.5	exon9	c.G854A	p.G285E
116BOR	MZL	INDOLENT	chr6	10226256	10226256	C	A	ARPC1A	SNP	exonic	Missense_Mutation	ENSCAFT00000036371.4	exon3	c.G337T	p.V113F
116BOR	MZL	INDOLENT	chrX	35769843	35769843	A	T	DDX3X	SNP	exonic	Missense_Mutation	ENSCAFT00000061818.1	exon8	c.A764T	p.D255V
116BOR	MZL	INDOLENT	chr26	10021688	10021688	C	G	PTPN11	SNP	intronic	Intron	-	-	-	-
116BOR	MZL	INDOLENT	chr8	70789790	70789790	G	A	TRAF3	SNP	UTR3	3'UTR	-	-	-	-
116BOR	MZL	INDOLENT	chr8	70789908	70789908	T	C	TRAF3	SNP	UTR3	3'UTR	-	-	-	-
116BOR	MZL	INDOLENT	chr26	37910015	37910015	C	CT	PTEN	NA	exonic	Frame_Shift_Ins	ENSCAFT00000024821.4	exon7	c.826delinsCT	p.R276Lfs*4
117VEG	MZL	INDOLENT	chr27	5543213	5543213	G	A	KMT2D	SNP	exonic	Missense_Mutation	ENSCAFT00000045185.2	exon38	c.G12247A	p.A4083T
117VEG	MZL	INDOLENT	chr5	32563778	32563778	T	G	TP53	SNP	exonic	Missense_Mutation	ENSCAFT00000086831.1	exon4	c.A473C	p.H158P
117VEG	MZL	INDOLENT	chr15	8971876	8971876	T	C	TUT4	SNP	intronic	Intron	-	-	-	-
117VEG	MZL	INDOLENT	chr16	25454762	25454762	C	A	IDO1	SNP	intergenic	IGR	-	-	-	-
117VEG	MZL	INDOLENT	chr18	41635323	41635323	G	A	PTPRJ	SNP	upstream	5'Flank	-	-	-	-
117VEG	MZL	INDOLENT	chr34	12600344	12600344	G	A	PIK3CA	SNP	intronic	Intron	-	-	-	-
117VEG	MZL	INDOLENT	chr9	22759958	22759958	G	GT	ERBB2	NA	UTR3	3'UTR	-	-	-	-
117VEG	MZL	INDOLENT	chrX	70625371	70625371	C	T	DIAPH2	SNP	intronic	Intron	-	-	-	-
117VEG	MZL	INDOLENT	chrX	70625605	70625605	C	T	DIAPH2	SNP	intronic	Intron	-	-	-	-
118PAT	MZL	INDOLENT	chr14	11043385	11043385	G	A	POT1	SNP	exonic	Missense_Mutation	ENSCAFT00000080986.1	exon6	c.G412A	p.G138S
118PAT	MZL	INDOLENT	chr8	70774039	70774039	G	T	TRAF3	SNP	exonic	Nonsense_Mutation	ENSCAFT00000028719.4	exon6	c.G577T	p.E193X
118PAT	MZL	INDOLENT	chr8	70789556	70789556	C	T	TRAF3	SNP	exonic	Nonsense_Mutation	ENSCAFT00000085506.1	exon8	c.C1369T	p.Q457X
118PAT	MZL	INDOLENT	chrX	35769843	35769843	A	C	DDX3X	SNP	exonic	Missense_Mutation	ENSCAFT00000061818.1	exon8	c.A764C	p.D255A
118PAT	MZL	INDOLENT	chrX	35770538	35770538	T	A	DDX3X	SNP	exonic	Missense_Mutation	ENSCAFT00000061818.1	exon9	c.T848A	p.F283Y
118PAT	MZL	INDOLENT	chr20	41769685	41769685	A	G	SETD2	SNP	intronic	Intron	-	-	-	-
118PAT	MZL	INDOLENT	chr20	57559267	57559267	C	T	CBARP	SNP	UTR3	3'UTR	-	-	-	-
118PAT	MZL	INDOLENT	chr23	24688032	24688034	CAG	C	SATB1	NA	UTR3	3'UTR	-	-	-	-
119MAZ	MZL	INDOLENT	chr13	25203045	25203045	C	G	MYC	SNP	exonic	Missense_Mutation	ENSCAFT00000001656.4	exon2	c.C218G	p.P73R
119MAZ	MZL	INDOLENT	chr13	25205070	25205070	G	C	MYC	SNP	exonic	Missense_Mutation	ENSCAFT00000001656.4	exon3	c.G1120C	p.V374L
119MAZ	MZL	INDOLENT	chr2	53516367	53516367	G	C	PIK3R1	SNP	intronic	Intron	-	-	-	-
119MAZ	MZL	INDOLENT	chr27	22258374	22258383	CCCTCGGCTG	C	KRAS	NA	UTR5	5'UTR	-	-	-	-
119MAZ	MZL	INDOLENT	chr20	41710780	41710781	AG	A	SETD2	NA	exonic	Frame_Shift_Del	ENSCAFT00000021260.4	exon3	c.1070_1071delinsA	p.D358Ifs*2
119MAZ	MZL	INDOLENT	chr8	70788133	70788133	C	CA	TRAF3	NA	exonic	Frame_Shift_Ins	ENSCAFT00000085506.1	exon7	c.837delinsCA	p.E280Rfs*34
120TOR	MZL	INDOLENT	chr14	11014693	11014693	G	A	POT1	SNP	exonic	Missense_Mutation	ENSCAFT00000086242.1	exon3	c.G179A	p.G60E
120TOR	MZL	INDOLENT	chr8	70788164	70788164	C	T	TRAF3	SNP	exonic	Nonsense_Mutation	ENSCAFT00000085506.1	exon7	c.C868T	p.Q290X
120TOR	MZL	INDOLENT	chr14	55598711	55598711	A	G	MET	SNP	UTR5	5'UTR	-	-	-	-
120TOR	MZL	INDOLENT	chrX	35766057	35766057	C	CT	DDX3X	NA	intronic	Intron	-	-	-	-
120TOR	MZL	INDOLENT	chr27	5541606	5541607	TG	T	KMT2D	NA	exonic	Frame_Shift_Del	ENSCAFT00000045185.2	exon35	c.10955_10956delinsT	p.Q3653Rfs*31
12SUG	DLBCL	AGGRESSIVE	chr14	11043389	11043389	C	T	POT1	SNP	exonic	Missense_Mutation	ENSCAFT00000080986.1	exon6	c.C416T	p.T139I
12SUG	DLBCL	AGGRESSIVE	chr20	41776218	41776218	T	G	SETD2	SNP	exonic	Nonsense_Mutation	ENSCAFT00000021260.4	exon16	c.T6963G	p.Y2321X
12SUG	DLBCL	AGGRESSIVE	chr5	32563388	32563388	C	T	TP53	SNP	exonic	Missense_Mutation	ENSCAFT00000086831.1	exon5	c.G641A	p.R214Q
12SUG	DLBCL	AGGRESSIVE	chr9	18302120	18302121	CA	C	MAP3K14	NA	UTR3	3'UTR	-	-	-	-
12SUG	DLBCL	AGGRESSIVE	chr8	70778549	70778549	C	CA	TRAF3	NA	exonic	Frame_Shift_Ins	ENSCAFT00000086511.1	exon7	c.656delinsCA	p.N220Kfs*8
13SCR	DLBCL	AGGRESSIVE	chr15	50192507	50192507	G	A	FBXW7	SNP	exonic	Missense_Mutation	ENSCAFT00000012962.5	exon9	c.C1654T	p.R552C
13SCR	DLBCL	AGGRESSIVE	chr15	50416398	50416398	C	T	FBXW7	SNP	exonic	Silent	ENSCAFT00000082966.1	exon1	c.G798A	p.R266R
13SCR	DLBCL	AGGRESSIVE	chr19	15327491	15327491	C	T	FAT4	SNP	exonic	Missense_Mutation	ENSCAFT00000006363.5	exon1	c.G4555A	p.V1519I
13SCR	DLBCL	AGGRESSIVE	chr8	70789368	70789368	T	TTATGCG	TRAF3	NA	exonic	In_Frame_Ins	ENSCAFT00000085506.1	exon8	c.1181delinsTTATGCG	p.R396_G397insMR
14ROM	DLBCL	AGGRESSIVE	chr27	5537128	5537128	G	A	KMT2D	SNP	exonic	Silent	ENSCAFT00000045185.2	exon30	c.G8439A	p.P2813P
14ROM	DLBCL	AGGRESSIVE	chr8	70767968	70767968	C	G	TRAF3	SNP	exonic	Nonsense_Mutation	ENSCAFT00000028719.4	exon5	c.C516G	p.Y172X
14ROM	DLBCL	AGGRESSIVE	chr8	70789565	70789565	C	CTA	TRAF3	NA	exonic	Nonsense_Mutation	ENSCAFT00000085506.1	exon8	c.1378delinsCTA	p.E461*
14ROM	DLBCL	AGGRESSIVE	chr14	55598711	55598711	A	G	MET	SNP	UTR5	5'UTR	-	-	-	-
14ROM	DLBCL	AGGRESSIVE	chr5	32560586	32560586	G	A	TP53	SNP	downstream	3'Flank	-	-	-	-
14ROM	DLBCL	AGGRESSIVE	chr6	10214147	10214147	A	T	ARPC1A	SNP	UTR3	3'UTR	-	-	-	-
14VOL	MZL	INDOLENT	chr13	25203045	25203045	C	A	MYC	SNP	exonic	Missense_Mutation	ENSCAFT00000001656.4	exon2	c.C218A	p.P73Q
14VOL	MZL	INDOLENT	chr27	5536138	5536138	C	T	KMT2D	SNP	exonic	Silent	ENSCAFT00000045185.2	exon30	c.C7449T	p.S2483S
14VOL	MZL	INDOLENT	chr8	70789263	70789263	G	A	TRAF3	SNP	exonic	Missense_Mutation	ENSCAFT00000085506.1	exon8	c.G1076A	p.S359N
14VOL	MZL	INDOLENT	chr13	47472786	47472786	C	T	KDR	SNP	intronic	Intron	-	-	-	-
14VOL	MZL	INDOLENT	chr14	55598711	55598711	A	G	MET	SNP	UTR5	5'UTR	-	-	-	-
14VOL	MZL	INDOLENT	chr16	25454628	25454629	CA	C	IDO1	NA	intergenic	IGR	-	-	-	-
14VOL	MZL	INDOLENT	chr20	41781534	41781534	G	A	SETD2	SNP	intronic	Intron	-	-	-	-
14VOL	MZL	INDOLENT	chr6	50301146	50301147	TG	T	PALMD	NA	intergenic	IGR	-	-	-	-
14VOL	MZL	INDOLENT	chr9	22759958	22759958	G	GT	ERBB2	NA	UTR3	3'UTR	-	-	-	-
15RGR	DLBCL	AGGRESSIVE	chr14	11043397	11043397	G	T	POT1	SNP	exonic	Missense_Mutation	ENSCAFT00000080986.1	exon6	c.G424T	p.G142C
15RGR	DLBCL	AGGRESSIVE	chrX	35766057	35766057	C	CT	DDX3X	NA	intronic	Intron	-	-	-	-
169MAZ	MZL	INDOLENT	chr20	41738540	41738540	G	C	SETD2	SNP	exonic	Missense_Mutation	ENSCAFT00000021260.4	exon12	c.G6019C	p.A2007P
169MAZ	MZL	INDOLENT	chr20	41768992	41768992	C	T	SETD2	SNP	exonic	Nonsense_Mutation	ENSCAFT00000021260.4	exon15	c.C6319T	p.R2107X
169MAZ	MZL	INDOLENT	chr27	5548846	5548846	C	T	KMT2D	SNP	exonic	Missense_Mutation	ENSCAFT00000045185.2	exon47	c.C15703T	p.R5235W
169MAZ	MZL	INDOLENT	chr5	32563379	32563379	A	G	TP53	SNP	exonic	Missense_Mutation	ENSCAFT00000086831.1	exon5	c.T650C	p.L217P
169MAZ	MZL	INDOLENT	chr6	10226229	10226229	T	A	ARPC1A	SNP	exonic	Nonsense_Mutation	ENSCAFT00000036371.4	exon3	c.A364T	p.K122X
169MAZ	MZL	INDOLENT	chr27	5541419	5541420	TG	T	KMT2D	NA	intronic	Intron	-	-	-	-
16PER	DLBCL	AGGRESSIVE	chr14	55627538	55627538	C	T	MET	SNP	exonic	Missense_Mutation	ENSCAFT00000005469.3	exon2	c.C1202T	p.A401V
16PER	DLBCL	AGGRESSIVE	chr15	50194721	50194721	C	A	FBXW7	SNP	exonic	Missense_Mutation	ENSCAFT00000012962.5	exon8	c.G1409T	p.G470V
16PER	DLBCL	AGGRESSIVE	chr20	41712888	41712888	C	T	SETD2	SNP	exonic	Missense_Mutation	ENSCAFT00000021260.4	exon3	c.C3178T	p.R1060C
16PER	DLBCL	AGGRESSIVE	chr8	70789226	70789226	C	T	TRAF3	SNP	exonic	Nonsense_Mutation	ENSCAFT00000085506.1	exon8	c.C1039T	p.Q347X
16PER	DLBCL	AGGRESSIVE	chrX	35770519	35770519	C	T	DDX3X	SNP	exonic	Missense_Mutation	ENSCAFT00000061818.1	exon9	c.C829T	p.R277W
170BER	BL	AGGRESSIVE	chr14	11030288	11030288	C	T	POT1	SNP	exonic	Missense_Mutation	ENSCAFT00000086242.1	exon4	c.C268T	p.P90S
170BER	BL	AGGRESSIVE	chr8	70790001	70790005	AACAC	A	TRAF3	NA	UTR3	3'UTR	-	-	-	-
171AMO	MZL	INDOLENT	chr2	53523000	53523000	C	T	PIK3R1	SNP	exonic	Silent	ENSCAFT00000061673.1	exon9	c.C1167T	p.C389C
171AMO	MZL	INDOLENT	chr20	41721055	41721055	T	C	SETD2	SNP	exonic	Missense_Mutation	ENSCAFT00000021260.4	exon6	c.T4820C	p.L1607P
171AMO	MZL	INDOLENT	chr20	41722207	41722207	A	T	SETD2	SNP	exonic	Missense_Mutation	ENSCAFT00000021260.4	exon7	c.A4877T	p.N1626I
171AMO	MZL	INDOLENT	chr9	18280461	18280461	G	C	MAP3K14	SNP	exonic	Missense_Mutation	ENSCAFT00000021854.4	exon1	c.G244C	p.A82P
171AMO	MZL	INDOLENT	chr2	53516425	53516425	A	T	PIK3R1	SNP	intronic	Intron	-	-	-	-
171AMO	MZL	INDOLENT	chr34	12663046	12663046	C	T	PIK3CA	SNP	intronic	Intron	-	-	-	-
172CIO	MZL	INDOLENT	chr13	25203041	25203041	C	T	MYC	SNP	exonic	Missense_Mutation	ENSCAFT00000001656.4	exon2	c.C214T	p.P72S
172CIO	MZL	INDOLENT	chr24	29211682	29211682	G	C	PLCG1	SNP	exonic	Missense_Mutation	ENSCAFT00000014441.2	exon29	c.G3412C	p.V1138L
172CIO	MZL	INDOLENT	chr8	70789205	70789205	C	T	TRAF3	SNP	exonic	Nonsense_Mutation	ENSCAFT00000085506.1	exon8	c.C1018T	p.R340X
172CIO	MZL	INDOLENT	chr18	41635323	41635323	G	A	PTPRJ	SNP	upstream	5'Flank	-	-	-	-
172CIO	MZL	INDOLENT	chr34	40579658	40579658	A	C	TBL1XR1	SNP	intronic	Intron	-	-	-	-
172CIO	MZL	INDOLENT	chr6	10214147	10214147	A	T	ARPC1A	SNP	UTR3	3'UTR	-	-	-	-
172CIO	MZL	INDOLENT	chr9	22760167	22760167	C	T	ERBB2	SNP	UTR3	3'UTR	-	-	-	-
173ORT	B-LL	AGGRESSIVE	chr14	55723789	55723789	A	G	MET	SNP	UTR3	3'UTR	-	-	-	-
173ORT	B-LL	AGGRESSIVE	chr14	55723796	55723796	A	T	MET	SNP	UTR3	3'UTR	-	-	-	-
174LOG	MZL	INDOLENT	chr16	8233839	8233839	C	T	BRAF	SNP	exonic	Missense_Mutation	ENSCAFT00000006305.5	exon2	c.C298T	p.P100S
174LOG	MZL	INDOLENT	chr34	40595654	40595654	T	C	TBL1XR1	SNP	exonic	Silent	ENSCAFT00000024648.5	exon9	c.A855G	p.G285G
174LOG	MZL	INDOLENT	chr34	40595655	40595655	C	T	TBL1XR1	SNP	exonic	Missense_Mutation	ENSCAFT00000024648.5	exon9	c.G854A	p.G285E
174LOG	MZL	INDOLENT	chr34	40598401	40598401	C	A	TBL1XR1	SNP	exonic	Missense_Mutation	ENSCAFT00000024648.5	exon7	c.G694T	p.D232Y
174LOG	MZL	INDOLENT	chr3	21071221	21071221	G	GTAAC	RASA1	NA	UTR3	3'UTR	-	-	-	-
174LOG	MZL	INDOLENT	chr34	12663046	12663046	C	T	PIK3CA	SNP	intronic	Intron	-	-	-	-
175APR	FL	INDOLENT	chr15	50190726	50190726	A	T	FBXW7	SNP	exonic	Missense_Mutation	ENSCAFT00000012962.5	exon10	c.T1941A	p.D647E
175APR	FL	INDOLENT	chr15	50192506	50192506	C	A	FBXW7	SNP	exonic	Missense_Mutation	ENSCAFT00000012962.5	exon9	c.G1655T	p.R552L
175APR	FL	INDOLENT	chr19	15330599	15330599	T	A	FAT4	SNP	exonic	Missense_Mutation	ENSCAFT00000006363.5	exon1	c.A1447T	p.N483Y
175APR	FL	INDOLENT	chr27	5534658	5534658	T	A	KMT2D	SNP	exonic	Missense_Mutation	ENSCAFT00000045185.2	exon27	c.T6397A	p.F2133I
175APR	FL	INDOLENT	chr5	32563028	32563028	C	T	TP53	SNP	exonic	Missense_Mutation	ENSCAFT00000086831.1	exon6	c.G740A	p.R247H
175APR	FL	INDOLENT	chr5	32565142	32565142	C	T	TP53	SNP	exonic	Translation_Start_Site	ENSCAFT00000086831.1	exon1	c.G3A	p.M1?
175APR	FL	INDOLENT	chr8	70788125	70788125	C	T	TRAF3	SNP	exonic	Nonsense_Mutation	ENSCAFT00000085506.1	exon7	c.C829T	p.R277X
176VIC	MZL	INDOLENT	chr14	11014678	11014678	C	T	POT1	SNP	exonic	Missense_Mutation	ENSCAFT00000086242.1	exon3	c.C164T	p.P55L
176VIC	MZL	INDOLENT	chr15	50194595	50194595	C	T	FBXW7	SNP	exonic	Missense_Mutation	ENSCAFT00000012962.5	exon8	c.G1535A	p.R512H
176VIC	MZL	INDOLENT	chr8	70788125	70788125	C	T	TRAF3	SNP	exonic	Nonsense_Mutation	ENSCAFT00000085506.1	exon7	c.C829T	p.R277X
176VIC	MZL	INDOLENT	chr8	70761926	70761926	G	GT	TRAF3	NA	exonic	Frame_Shift_Ins	ENSCAFT00000028719.4	exon2	c.126delinsGT	p.V44Cfs*11
177LAS	BL	AGGRESSIVE	chr20	41711491	41711491	G	A	SETD2	SNP	exonic	Missense_Mutation	ENSCAFT00000021260.4	exon3	c.G1781A	p.G594D
177LAS	BL	AGGRESSIVE	chr27	5536670	5536670	C	G	KMT2D	SNP	exonic	Missense_Mutation	ENSCAFT00000045185.2	exon30	c.C7981G	p.L2661V
177LAS	BL	AGGRESSIVE	chr2	53516426	53516426	T	A	PIK3R1	SNP	intronic	Intron	-	-	-	-
177LAS	BL	AGGRESSIVE	chr6	10214147	10214147	A	T	ARPC1A	SNP	UTR3	3'UTR	-	-	-	-
177LAS	BL	AGGRESSIVE	chr8	70783056	70783056	G	T	TRAF3	SNP	splicing	Splice_Site	-	-	-	-
178GRA	BL	AGGRESSIVE	chr20	41711491	41711491	G	A	SETD2	SNP	exonic	Missense_Mutation	ENSCAFT00000021260.4	exon3	c.G1781A	p.G594D
178GRA	BL	AGGRESSIVE	chr8	70761988	70761988	C	T	TRAF3	SNP	exonic	Missense_Mutation	ENSCAFT00000028719.4	exon2	c.C188T	p.P63L
178GRA	BL	AGGRESSIVE	chr8	70782960	70782960	C	T	TRAF3	SNP	exonic	Nonsense_Mutation	ENSCAFT00000085506.1	exon6	c.C616T	p.Q206X
178GRA	BL	AGGRESSIVE	chrX	35771447	35771447	G	A	DDX3X	SNP	exonic	Missense_Mutation	ENSCAFT00000061818.1	exon12	c.G1384A	p.G462R
178GRA	BL	AGGRESSIVE	chr20	41675690	41675690	T	C	SETD2	SNP	intronic	Intron	-	-	-	-
179GAL	MZL	INDOLENT	chr27	5525961	5525961	G	A	KMT2D	SNP	exonic	Silent	ENSCAFT00000013872.6	exon10	c.G2544A	p.E848E
179GAL	MZL	INDOLENT	chr27	5544685	5544685	G	A	KMT2D	SNP	exonic	Silent	ENSCAFT00000045185.2	exon38	c.G13719A	p.T4573T
179GAL	MZL	INDOLENT	chr9	22770592	22770592	T	G	ERBB2	SNP	intronic	Intron	-	-	-	-
17ZNF	DLBCL	AGGRESSIVE	chr14	11043403	11043403	G	A	POT1	SNP	exonic	Missense_Mutation	ENSCAFT00000080986.1	exon6	c.G430A	p.G144R
17ZNF	DLBCL	AGGRESSIVE	chr20	41735531	41735531	G	T	SETD2	SNP	exonic	Nonsense_Mutation	ENSCAFT00000021260.4	exon10	c.G5230T	p.E1744X
17ZNF	DLBCL	AGGRESSIVE	chr6	10226256	10226256	C	A	ARPC1A	SNP	exonic	Missense_Mutation	ENSCAFT00000036371.4	exon3	c.G337T	p.V113F
17ZNF	DLBCL	AGGRESSIVE	chr8	70789358	70789358	T	G	TRAF3	SNP	exonic	Missense_Mutation	ENSCAFT00000085506.1	exon8	c.T1171G	p.F391V
17ZNF	DLBCL	AGGRESSIVE	chr14	55598711	55598711	A	G	MET	SNP	UTR5	5'UTR	-	-	-	-
17ZNF	DLBCL	AGGRESSIVE	chrX	35766057	35766057	C	CT	DDX3X	NA	intronic	Intron	-	-	-	-
180REG	B-SLL	INDOLENT	chr13	25203038	25203038	A	G	MYC	SNP	exonic	Missense_Mutation	ENSCAFT00000001656.4	exon2	c.A211G	p.T71A
180REG	B-SLL	INDOLENT	chr14	11053068	11053068	G	A	POT1	SNP	exonic	Nonsense_Mutation	ENSCAFT00000080986.1	exon10	c.G891A	p.W297X
180REG	B-SLL	INDOLENT	chr19	15242111	15242111	C	T	FAT4	SNP	exonic	Missense_Mutation	ENSCAFT00000006363.5	exon3	c.G5402A	p.R1801Q
180REG	B-SLL	INDOLENT	chr8	70761969	70761970	CG	C	TRAF3	NA	exonic	Frame_Shift_Del	ENSCAFT00000028719.4	exon2	c.169_170delinsC	p.R57Pfs*25
181GIR	FL	INDOLENT	chr13	25203045	25203045	C	T	MYC	SNP	exonic	Missense_Mutation	ENSCAFT00000001656.4	exon2	c.C218T	p.P73L
181GIR	FL	INDOLENT	chr18	41635323	41635323	G	A	PTPRJ	SNP	upstream	5'Flank	-	-	-	-
181GIR	FL	INDOLENT	chr8	70774093	70774094	CA	C	TRAF3	NA	exonic	Frame_Shift_Del	ENSCAFT00000028719.4	exon6	c.631_632delinsC	p.Q211Rfs*4
182BAN	FL	INDOLENT	chr14	11033798	11033798	G	T	POT1	SNP	exonic	Nonsense_Mutation	ENSCAFT00000080986.1	exon4	c.G124T	p.E42X
182BAN	FL	INDOLENT	chr27	5525667	5525667	A	G	KMT2D	SNP	exonic	Silent	ENSCAFT00000013872.6	exon10	c.A2250G	p.P750P
182BAN	FL	INDOLENT	chr27	5527662	5527662	G	A	KMT2D	SNP	exonic	Silent	ENSCAFT00000013872.6	exon11	c.G4152A	p.E1384E
182BAN	FL	INDOLENT	chr27	5537164	5537164	C	T	KMT2D	SNP	exonic	Silent	ENSCAFT00000045185.2	exon30	c.C8475T	p.G2825G
182BAN	FL	INDOLENT	chr9	18280410	18280410	G	A	MAP3K14	SNP	exonic	Missense_Mutation	ENSCAFT00000021854.4	exon1	c.G193A	p.G65S
182BAN	FL	INDOLENT	chr9	22759958	22759958	G	GT	ERBB2	NA	UTR3	3'UTR	-	-	-	-
183FOR	MZL	INDOLENT	chr19	15331389	15331389	C	T	FAT4	SNP	exonic	Silent	ENSCAFT00000006363.5	exon1	c.G657A	p.L219L
183FOR	MZL	INDOLENT	chr8	70767969	70767969	C	T	TRAF3	SNP	exonic	Nonsense_Mutation	ENSCAFT00000028719.4	exon5	c.C517T	p.R173X
183FOR	MZL	INDOLENT	chr13	25200664	25200664	G	A	MYC	SNP	UTR5	5'UTR	-	-	-	-
183FOR	MZL	INDOLENT	chr14	55723990	55723998	AGGCTGGAG	A	MET	NA	UTR3	3'UTR	-	-	-	-
183FOR	MZL	INDOLENT	chr26	37913101	37913101	A	AT	PTEN	NA	UTR3	3'UTR	-	-	-	-
183FOR	MZL	INDOLENT	chr5	32565810	32565810	G	A	TP53	SNP	intronic	Intron	-	-	-	-
183FOR	MZL	INDOLENT	chr9	22759958	22759958	G	GT	ERBB2	NA	UTR3	3'UTR	-	-	-	-
183FOR	MZL	INDOLENT	chr9	22760505	22760506	TA	T	ERBB2	NA	UTR3	3'UTR	-	-	-	-
184SCH	MZL	INDOLENT	chr19	15160086	15160086	A	G	FAT4	SNP	exonic	Silent	ENSCAFT00000059626.1	exon16	c.T13680C	p.D4560D
184SCH	MZL	INDOLENT	chr20	41712190	41712190	C	A	SETD2	SNP	exonic	Nonsense_Mutation	ENSCAFT00000021260.4	exon3	c.C2480A	p.S827X
184SCH	MZL	INDOLENT	chr27	5528179	5528179	G	A	KMT2D	SNP	exonic	Missense_Mutation	ENSCAFT00000013872.6	exon12	c.G4208A	p.R1403H
184SCH	MZL	INDOLENT	chr9	18280468	18280468	C	G	MAP3K14	SNP	exonic	Missense_Mutation	ENSCAFT00000021854.4	exon1	c.C251G	p.A84G
184SCH	MZL	INDOLENT	chr34	40656856	40656856	C	T	TBL1XR1	SNP	UTR5	5'UTR	-	-	-	-
184SCH	MZL	INDOLENT	chr9	22759958	22759958	G	GT	ERBB2	NA	UTR3	3'UTR	-	-	-	-
185MAG	B-SLL	INDOLENT	chr14	11043392	11043392	G	A	POT1	SNP	exonic	Missense_Mutation	ENSCAFT00000080986.1	exon6	c.G419A	p.S140N
185MAG	B-SLL	INDOLENT	chr13	47160915	47160915	T	C	KIT	SNP	intronic	Intron	-	-	-	-
185MAG	B-SLL	INDOLENT	chr2	53524022	53524022	C	G	PIK3R1	SNP	UTR3	3'UTR	-	-	-	-
186CAN	B-SLL	INDOLENT	chr34	40579593	40579593	A	T	TBL1XR1	SNP	exonic	Missense_Mutation	ENSCAFT00000024648.5	exon15	c.T1461A	p.F487L
186CAN	B-SLL	INDOLENT	chr13	47473925	47473925	A	AT	KDR	NA	intronic	Intron	-	-	-	-
186CAN	B-SLL	INDOLENT	chr14	55598821	55598821	T	C	MET	SNP	UTR5	5'UTR	-	-	-	-
186CAN	B-SLL	INDOLENT	chr18	41586377	41586378	CA	C	PTPRJ	NA	UTR3	3'UTR	-	-	-	-
186CAN	B-SLL	INDOLENT	chr18	41635323	41635323	G	A	PTPRJ	SNP	upstream	5'Flank	-	-	-	-
186CAN	B-SLL	INDOLENT	chr2	53524022	53524022	C	G	PIK3R1	SNP	UTR3	3'UTR	-	-	-	-
187FOG	B-SLL	INDOLENT	chr27	22261834	22261834	T	A	KRAS	SNP	exonic	Missense_Mutation	ENSCAFT00000010525.4	exon2	c.T353A	p.I118N
187FOG	B-SLL	INDOLENT	chr8	70764081	70764081	G	A	TRAF3	SNP	exonic	Silent	ENSCAFT00000028719.4	exon3	c.G297A	p.K99K
187FOG	B-SLL	INDOLENT	chr13	47160880	47160880	G	A	KIT	SNP	intronic	Intron	-	-	-	-
187FOG	B-SLL	INDOLENT	chr18	41586377	41586378	CA	C	PTPRJ	NA	UTR3	3'UTR	-	-	-	-
187FOG	B-SLL	INDOLENT	chr2	53516425	53516425	A	T	PIK3R1	SNP	intronic	Intron	-	-	-	-
187FOG	B-SLL	INDOLENT	chr2	53516426	53516426	T	A	PIK3R1	SNP	intronic	Intron	-	-	-	-
187FOG	B-SLL	INDOLENT	chr2	53524022	53524022	C	G	PIK3R1	SNP	UTR3	3'UTR	-	-	-	-
187FOG	B-SLL	INDOLENT	chr14	11014598	11014598	C	CTA	POT1	NA	exonic	Frame_Shift_Ins	ENSCAFT00000086242.1	exon3	c.84delinsCTA	p.T32Ifs*4
188TAD	B-LL	AGGRESSIVE	chr18	41608544	41608544	C	T	PTPRJ	SNP	exonic	Missense_Mutation	ENSCAFT00000013154.4	exon12	c.G2560A	p.A854T
188TAD	B-LL	AGGRESSIVE	chr27	5525667	5525667	A	G	KMT2D	SNP	exonic	Silent	ENSCAFT00000013872.6	exon10	c.A2250G	p.P750P
188TAD	B-LL	AGGRESSIVE	chr13	47473925	47473925	A	AT	KDR	NA	intronic	Intron	-	-	-	-
188TAD	B-LL	AGGRESSIVE	chr14	55723990	55723998	AGGCTGGAG	A	MET	NA	UTR3	3'UTR	-	-	-	-
188TAD	B-LL	AGGRESSIVE	chr18	41586377	41586378	CA	C	PTPRJ	NA	UTR3	3'UTR	-	-	-	-
188TAD	B-LL	AGGRESSIVE	chr2	53524022	53524022	C	G	PIK3R1	SNP	UTR3	3'UTR	-	-	-	-
189RAS	BL	AGGRESSIVE	chr2	53522063	53522063	T	C	PIK3R1	SNP	exonic	Missense_Mutation	ENSCAFT00000061673.1	exon7	c.T908C	p.L303P
189RAS	BL	AGGRESSIVE	chrX	35770528	35770528	G	T	DDX3X	SNP	exonic	Missense_Mutation	ENSCAFT00000061818.1	exon9	c.G838T	p.D280Y
189RAS	BL	AGGRESSIVE	chr9	22759958	22759958	G	GT	ERBB2	NA	UTR3	3'UTR	-	-	-	-
189RAS	BL	AGGRESSIVE	chr2	53524022	53524022	C	G	PIK3R1	SNP	UTR3	3'UTR	-	-	-	-
189RAS	BL	AGGRESSIVE	chr8	70778587	70778587	G	GT	TRAF3	NA	exonic	Frame_Shift_Ins	ENSCAFT00000086511.1	exon7	c.694delinsGT	p.Q233Afs*11
18ZMB	DLBCL	AGGRESSIVE	chr20	41722224	41722224	A	G	SETD2	SNP	exonic	Missense_Mutation	ENSCAFT00000021260.4	exon7	c.A4894G	p.N1632D
18ZMB	DLBCL	AGGRESSIVE	chr34	40595655	40595655	C	T	TBL1XR1	SNP	exonic	Missense_Mutation	ENSCAFT00000024648.5	exon9	c.G854A	p.G285E
18ZMB	DLBCL	AGGRESSIVE	chr6	10217280	10217280	C	T	ARPC1A	SNP	exonic	Missense_Mutation	ENSCAFT00000036371.4	exon7	c.G1016A	p.R339H
18ZMB	DLBCL	AGGRESSIVE	chr8	70789392	70789392	T	G	TRAF3	SNP	exonic	Missense_Mutation	ENSCAFT00000085506.1	exon8	c.T1205G	p.L402R
18ZMB	DLBCL	AGGRESSIVE	chr14	55598706	55598706	C	A	MET	SNP	UTR5	5'UTR	-	-	-	-
191DRU	B-SLL	INDOLENT	chr14	11033584	11033584	T	A	POT1	SNP	exonic	Missense_Mutation	ENSCAFT00000086242.1	exon5	c.T363A	p.F121L
191DRU	B-SLL	INDOLENT	chr20	41711491	41711491	G	A	SETD2	SNP	exonic	Missense_Mutation	ENSCAFT00000021260.4	exon3	c.G1781A	p.G594D
191DRU	B-SLL	INDOLENT	chr8	70789205	70789205	C	T	TRAF3	SNP	exonic	Nonsense_Mutation	ENSCAFT00000085506.1	exon8	c.C1018T	p.R340X
191DRU	B-SLL	INDOLENT	chr8	70789353	70789353	C	A	TRAF3	SNP	exonic	Nonsense_Mutation	ENSCAFT00000085506.1	exon8	c.C1166A	p.S389X
191DRU	B-SLL	INDOLENT	chr18	41586377	41586378	CA	C	PTPRJ	NA	UTR3	3'UTR	-	-	-	-
191DRU	B-SLL	INDOLENT	chr2	53516367	53516367	G	C	PIK3R1	SNP	intronic	Intron	-	-	-	-
191DRU	B-SLL	INDOLENT	chr2	53524022	53524022	C	G	PIK3R1	SNP	UTR3	3'UTR	-	-	-	-
191DRU	B-SLL	INDOLENT	chr20	41797747	41797747	G	A	SETD2	SNP	intronic	Intron	-	-	-	-
191DRU	B-SLL	INDOLENT	chr26	10022937	10022937	T	G	PTPN11	SNP	intronic	Intron	-	-	-	-
191DRU	B-SLL	INDOLENT	chr9	22759958	22759958	G	GT	ERBB2	NA	UTR3	3'UTR	-	-	-	-
191DRU	B-SLL	INDOLENT	chr34	40582885	40582888	CAGT	C	TBL1XR1	NA	exonic	In_Frame_Del	ENSCAFT00000024648.5	exon14	c.1267_1270delinsG	p.T423del
192RUZ	B-SLL	INDOLENT	chr27	5539091	5539091	G	C	KMT2D	SNP	exonic	Missense_Mutation	ENSCAFT00000045185.2	exon33	c.G9989C	p.S3330T
192RUZ	B-SLL	INDOLENT	chr27	22261820	22261820	G	T	KRAS	SNP	exonic	Missense_Mutation	ENSCAFT00000010525.4	exon2	c.G339T	p.L113F
192RUZ	B-SLL	INDOLENT	chr8	70789431	70789431	T	C	TRAF3	SNP	exonic	Missense_Mutation	ENSCAFT00000085506.1	exon8	c.T1244C	p.L415P
192RUZ	B-SLL	INDOLENT	chr2	53524022	53524022	C	G	PIK3R1	SNP	UTR3	3'UTR	-	-	-	-
192RUZ	B-SLL	INDOLENT	chr8	70790001	70790005	AACAC	A	TRAF3	NA	UTR3	3'UTR	-	-	-	-
192RUZ	B-SLL	INDOLENT	chr27	5525567	5525568	GC	G	KMT2D	NA	exonic	Frame_Shift_Del	ENSCAFT00000013872.6	exon10	c.2150_2151delinsG	p.L719Cfs*310
193MAR	DLBCL	AGGRESSIVE	chr14	11033592	11033592	T	A	POT1	SNP	exonic	Nonsense_Mutation	ENSCAFT00000086242.1	exon5	c.T371A	p.L124X
193MAR	DLBCL	AGGRESSIVE	chr27	5544309	5544309	C	T	KMT2D	SNP	exonic	Missense_Mutation	ENSCAFT00000045185.2	exon38	c.C13343T	p.A4448V
193MAR	DLBCL	AGGRESSIVE	chr5	32563391	32563391	C	A	TP53	SNP	exonic	Missense_Mutation	ENSCAFT00000086831.1	exon5	c.G638T	p.R213L
193MAR	DLBCL	AGGRESSIVE	chr8	70767969	70767969	C	T	TRAF3	SNP	exonic	Nonsense_Mutation	ENSCAFT00000028719.4	exon5	c.C517T	p.R173X
193MAR	DLBCL	AGGRESSIVE	chr14	55598711	55598711	A	G	MET	SNP	UTR5	5'UTR	-	-	-	-
193MAR	DLBCL	AGGRESSIVE	chr6	10213590	10213590	C	T	ARPC1A	SNP	UTR3	3'UTR	-	-	-	-
193MAR	DLBCL	AGGRESSIVE	chr6	10214147	10214147	A	T	ARPC1A	SNP	UTR3	3'UTR	-	-	-	-
193MAR	DLBCL	AGGRESSIVE	chr9	18301391	18301391	T	A	MAP3K14	SNP	UTR3	3'UTR	-	-	-	-
193MAR	DLBCL	AGGRESSIVE	chr8	70761888	70761888	T	TC	TRAF3	NA	exonic	Frame_Shift_Ins	ENSCAFT00000028719.4	exon2	c.88delinsTC	p.I31Hfs*24
194IAS	BL	AGGRESSIVE	chr14	11014693	11014693	G	A	POT1	SNP	exonic	Missense_Mutation	ENSCAFT00000086242.1	exon3	c.G179A	p.G60E
194IAS	BL	AGGRESSIVE	chr15	50194595	50194595	C	T	FBXW7	SNP	exonic	Missense_Mutation	ENSCAFT00000012962.5	exon8	c.G1535A	p.R512H
194IAS	BL	AGGRESSIVE	chr6	10226179	10226179	C	T	ARPC1A	SNP	exonic	Silent	ENSCAFT00000036371.4	exon3	c.G414A	p.K138K
194IAS	BL	AGGRESSIVE	chr6	10226256	10226256	C	A	ARPC1A	SNP	exonic	Missense_Mutation	ENSCAFT00000036371.4	exon3	c.G337T	p.V113F
194IAS	BL	AGGRESSIVE	chr8	70789353	70789353	C	A	TRAF3	SNP	exonic	Nonsense_Mutation	ENSCAFT00000085506.1	exon8	c.C1166A	p.S389X
194IAS	BL	AGGRESSIVE	chr14	55598711	55598711	A	G	MET	SNP	UTR5	5'UTR	-	-	-	-
194IAS	BL	AGGRESSIVE	chr14	55723796	55723796	A	T	MET	SNP	UTR3	3'UTR	-	-	-	-
194IAS	BL	AGGRESSIVE	chr18	41586377	41586378	CA	C	PTPRJ	NA	UTR3	3'UTR	-	-	-	-
194IAS	BL	AGGRESSIVE	chr26	37844610	37844610	A	C	PTEN	SNP	intronic	Intron	-	-	-	-
195BAN	B-LL	AGGRESSIVE	chr13	25203041	25203041	C	A	MYC	SNP	exonic	Missense_Mutation	ENSCAFT00000001656.4	exon2	c.C214A	p.P72T
195BAN	B-LL	AGGRESSIVE	chr15	50417171	50417171	G	A	FBXW7	SNP	exonic	Nonsense_Mutation	ENSCAFT00000082966.1	exon1	c.C25T	p.R9X
195BAN	B-LL	AGGRESSIVE	chr18	41635323	41635323	G	A	PTPRJ	SNP	upstream	5'Flank	-	-	-	-
195BAN	B-LL	AGGRESSIVE	chr2	53516425	53516425	A	T	PIK3R1	SNP	intronic	Intron	-	-	-	-
195BAN	B-LL	AGGRESSIVE	chr34	40656856	40656856	C	T	TBL1XR1	SNP	UTR5	5'UTR	-	-	-	-
195BAN	B-LL	AGGRESSIVE	chr5	32565568	32565570	CAG	C	TP53	NA	exonic	Frame_Shift_Del	ENSCAFT00000081814.1	exon1	c.101_103delinsG	p.S34Cfs*9
196BED	B-LL	AGGRESSIVE	chr14	11051375	11051375	A	T	POT1	SNP	exonic	Nonsense_Mutation	ENSCAFT00000080986.1	exon9	c.A727T	p.K243X
196BED	B-LL	AGGRESSIVE	chr14	55723789	55723789	A	G	MET	SNP	UTR3	3'UTR	-	-	-	-
196BED	B-LL	AGGRESSIVE	chr14	55723796	55723796	A	T	MET	SNP	UTR3	3'UTR	-	-	-	-
196BED	B-LL	AGGRESSIVE	chr3	21071221	21071221	G	GTAAC	RASA1	NA	UTR3	3'UTR	-	-	-	-
196BED	B-LL	AGGRESSIVE	chr9	18302065	18302065	C	A	MAP3K14	SNP	UTR3	3'UTR	-	-	-	-
197CAM	B-LL	AGGRESSIVE	chr15	50417188	50417188	C	T	FBXW7	SNP	exonic	Missense_Mutation	ENSCAFT00000082966.1	exon1	c.G8A	p.S3N
197CAM	B-LL	AGGRESSIVE	chr19	15195273	15195273	C	T	FAT4	SNP	exonic	Missense_Mutation	ENSCAFT00000006363.5	exon9	c.G11768A	p.S3923N
197CAM	B-LL	AGGRESSIVE	chr27	5548568	5548568	C	T	KMT2D	SNP	exonic	Missense_Mutation	ENSCAFT00000045185.2	exon47	c.C15425T	p.P5142L
197CAM	B-LL	AGGRESSIVE	chr5	32563041	32563041	G	T	TP53	SNP	exonic	Missense_Mutation	ENSCAFT00000086831.1	exon6	c.C727A	p.P243T
197CAM	B-LL	AGGRESSIVE	chr5	32563391	32563391	C	T	TP53	SNP	exonic	Missense_Mutation	ENSCAFT00000086831.1	exon5	c.G638A	p.R213Q
197CAM	B-LL	AGGRESSIVE	chr14	11044613	11044613	G	A	POT1	SNP	splicing	Splice_Site	-	-	-	-
197CAM	B-LL	AGGRESSIVE	chr14	55598711	55598711	A	G	MET	SNP	UTR5	5'UTR	-	-	-	-
197CAM	B-LL	AGGRESSIVE	chr2	53517583	53517583	C	T	PIK3R1	SNP	UTR5	5'UTR	-	-	-	-
197CAM	B-LL	AGGRESSIVE	chr27	22258077	22258077	A	G	KRAS	SNP	UTR5	5'UTR	-	-	-	-
197CAM	B-LL	AGGRESSIVE	chr3	21071221	21071221	G	GTAAC	RASA1	NA	UTR3	3'UTR	-	-	-	-
197CAM	B-LL	AGGRESSIVE	chr34	40739301	40739301	G	A	TBL1XR1	SNP	UTR5	5'UTR	-	-	-	-
197CAM	B-LL	AGGRESSIVE	chr9	18302065	18302065	C	A	MAP3K14	SNP	UTR3	3'UTR	-	-	-	-
198PAV	B-SLL	INDOLENT	chr14	55723990	55723998	AGGCTGGAG	A	MET	NA	UTR3	3'UTR	-	-	-	-
198PAV	B-SLL	INDOLENT	chr15	50214772	50214773	CA	C	FBXW7	NA	intronic	Intron	-	-	-	-
198PAV	B-SLL	INDOLENT	chr18	41586377	41586378	CA	C	PTPRJ	NA	UTR3	3'UTR	-	-	-	-
198PAV	B-SLL	INDOLENT	chr2	53524868	53524869	AT	A	PIK3R1	NA	UTR3	3'UTR	-	-	-	-
199PIA	B-SLL	INDOLENT	chr13	25203035	25203035	C	A	MYC	SNP	exonic	Missense_Mutation	ENSCAFT00000001656.4	exon2	c.C208A	p.P70T
199PIA	B-SLL	INDOLENT	chr14	11043404	11043404	G	A	POT1	SNP	exonic	Missense_Mutation	ENSCAFT00000080986.1	exon6	c.G431A	p.G144E
199PIA	B-SLL	INDOLENT	chr34	40587335	40587335	G	C	TBL1XR1	SNP	exonic	Missense_Mutation	ENSCAFT00000024648.5	exon11	c.C934G	p.L312V
199PIA	B-SLL	INDOLENT	chr13	25200623	25200623	C	T	MYC	SNP	UTR5	5'UTR	-	-	-	-
199PIA	B-SLL	INDOLENT	chr14	55598711	55598711	A	G	MET	SNP	UTR5	5'UTR	-	-	-	-
199PIA	B-SLL	INDOLENT	chr14	55723789	55723789	A	G	MET	SNP	UTR3	3'UTR	-	-	-	-
199PIA	B-SLL	INDOLENT	chr14	55723796	55723796	A	T	MET	SNP	UTR3	3'UTR	-	-	-	-
199PIA	B-SLL	INDOLENT	chr15	50417266	50417266	C	G	FBXW7	SNP	upstream	5'Flank	-	-	-	-
199PIA	B-SLL	INDOLENT	chr34	40739301	40739301	G	A	TBL1XR1	SNP	UTR5	5'UTR	-	-	-	-
199PIA	B-SLL	INDOLENT	chr9	22759958	22759958	G	GT	ERBB2	NA	UTR3	3'UTR	-	-	-	-
19ZMG	DLBCL	AGGRESSIVE	chr15	50192584	50192584	C	A	FBXW7	SNP	exonic	Missense_Mutation	ENSCAFT00000012962.5	exon9	c.G1577T	p.R526L
19ZMG	DLBCL	AGGRESSIVE	chr8	70767969	70767969	C	T	TRAF3	SNP	exonic	Nonsense_Mutation	ENSCAFT00000028719.4	exon5	c.C517T	p.R173X
19ZMG	DLBCL	AGGRESSIVE	chr5	32563808	32563808	C	G	TP53	SNP	intronic	Intron	-	-	-	-
19ZMG	DLBCL	AGGRESSIVE	chr34	40739301	40739301	G	A	TBL1XR1	SNP	UTR5	5'UTR	-	-	-	-
1ZON	DLBCL	AGGRESSIVE	chr14	11043401	11043401	G	A	POT1	SNP	exonic	Missense_Mutation	ENSCAFT00000080986.1	exon6	c.G428A	p.R143Q
1ZON	DLBCL	AGGRESSIVE	chr15	50194596	50194596	G	A	FBXW7	SNP	exonic	Missense_Mutation	ENSCAFT00000012962.5	exon8	c.C1534T	p.R512C
1ZON	DLBCL	AGGRESSIVE	chr15	50417188	50417188	C	T	FBXW7	SNP	exonic	Missense_Mutation	ENSCAFT00000082966.1	exon1	c.G8A	p.S3N
1ZON	DLBCL	AGGRESSIVE	chr19	15213252	15213252	G	A	FAT4	SNP	exonic	Silent	ENSCAFT00000006363.5	exon7	c.C7029T	p.A2343A
1ZON	DLBCL	AGGRESSIVE	chr8	70764043	70764043	A	T	TRAF3	SNP	exonic	Nonsense_Mutation	ENSCAFT00000028719.4	exon3	c.A259T	p.K87X
1ZON	DLBCL	AGGRESSIVE	chr8	70789356	70789356	T	A	TRAF3	SNP	exonic	Missense_Mutation	ENSCAFT00000085506.1	exon8	c.T1169A	p.L390Q
1ZON	DLBCL	AGGRESSIVE	chr14	55598711	55598711	A	G	MET	SNP	UTR5	5'UTR	-	-	-	-
1ZON	DLBCL	AGGRESSIVE	chr14	55723377	55723377	C	T	MET	SNP	UTR3	3'UTR	-	-	-	-
1ZON	DLBCL	AGGRESSIVE	chr18	41635323	41635323	G	A	PTPRJ	SNP	upstream	5'Flank	-	-	-	-
1ZON	DLBCL	AGGRESSIVE	chr2	53516425	53516425	A	T	PIK3R1	SNP	intronic	Intron	-	-	-	-
1ZON	DLBCL	AGGRESSIVE	chr9	22759958	22759958	G	GT	ERBB2	NA	UTR3	3'UTR	-	-	-	-
200MER	BL	AGGRESSIVE	chr13	25201135	25201135	C	A	MYC	SNP	UTR5	5'UTR	-	-	-	-
201CAR	FL	INDOLENT	chr27	5548850	5548850	G	A	KMT2D	SNP	exonic	Missense_Mutation	ENSCAFT00000045185.2	exon47	c.G15707A	p.R5236H
201CAR	FL	INDOLENT	chr9	18280461	18280461	G	C	MAP3K14	SNP	exonic	Missense_Mutation	ENSCAFT00000021854.4	exon1	c.G244C	p.A82P
201CAR	FL	INDOLENT	chrX	35771170	35771170	G	A	DDX3X	SNP	exonic	Missense_Mutation	ENSCAFT00000061818.1	exon11	c.G1195A	p.G399R
201CAR	FL	INDOLENT	chr6	10217809	10217809	G	A	ARPC1A	SNP	intronic	Intron	-	-	-	-
201CAR	FL	INDOLENT	chr9	22759958	22759958	G	GT	ERBB2	NA	UTR3	3'UTR	-	-	-	-
202MER	FL	INDOLENT	chr14	55627538	55627538	C	T	MET	SNP	exonic	Missense_Mutation	ENSCAFT00000005469.3	exon2	c.C1202T	p.A401V
202MER	FL	INDOLENT	chr6	10226256	10226256	C	A	ARPC1A	SNP	exonic	Missense_Mutation	ENSCAFT00000036371.4	exon3	c.G337T	p.V113F
204FAC	B-LL	AGGRESSIVE	chr6	10226256	10226256	C	A	ARPC1A	SNP	exonic	Missense_Mutation	ENSCAFT00000036371.4	exon3	c.G337T	p.V113F
204FAC	B-LL	AGGRESSIVE	chr9	18296644	18296644	C	T	MAP3K14	SNP	exonic	Missense_Mutation	ENSCAFT00000075933.1	exon9	c.C1789T	p.R597C
204FAC	B-LL	AGGRESSIVE	chr8	70790001	70790005	AACAC	A	TRAF3	NA	UTR3	3'UTR	-	-	-	-
204FAC	B-LL	AGGRESSIVE	chr34	40594367	40594373	GAATGAA	G	TBL1XR1	NA	exonic	In_Frame_Del	ENSCAFT00000024648.5	exon10	c.917_923delinsC	p.F306_H307del
205SPA	B-SLL	INDOLENT	chr13	25203044	25203044	C	T	MYC	SNP	exonic	Missense_Mutation	ENSCAFT00000001656.4	exon2	c.C217T	p.P73S
205SPA	B-SLL	INDOLENT	chr34	40587340	40587340	G	A	TBL1XR1	SNP	exonic	Missense_Mutation	ENSCAFT00000024648.5	exon11	c.C929T	p.P310L
205SPA	B-SLL	INDOLENT	chr8	70761840	70761840	C	T	TRAF3	SNP	exonic	Nonsense_Mutation	ENSCAFT00000028719.4	exon2	c.C40T	p.Q14X
205SPA	B-SLL	INDOLENT	chr20	41675690	41675690	T	C	SETD2	SNP	intronic	Intron	-	-	-	-
205SPA	B-SLL	INDOLENT	chr34	40739301	40739301	G	A	TBL1XR1	SNP	UTR5	5'UTR	-	-	-	-
205SPA	B-SLL	INDOLENT	chr9	22770220	22770220	C	T	ERBB2	SNP	intronic	Intron	-	-	-	-
206SEC	FL	INDOLENT	chr8	70789595	70789595	A	C	TRAF3	SNP	exonic	Missense_Mutation	ENSCAFT00000085506.1	exon8	c.A1408C	p.T470P
206SEC	FL	INDOLENT	chr2	53516425	53516425	A	T	PIK3R1	SNP	intronic	Intron	-	-	-	-
206SEC	FL	INDOLENT	chr2	53516426	53516426	T	A	PIK3R1	SNP	intronic	Intron	-	-	-	-
206SEC	FL	INDOLENT	chr34	40656856	40656856	C	T	TBL1XR1	SNP	UTR5	5'UTR	-	-	-	-
207MAR	FL	INDOLENT	chr14	11030307	11030307	G	A	POT1	SNP	exonic	Missense_Mutation	ENSCAFT00000086242.1	exon4	c.G287A	p.G96E
207MAR	FL	INDOLENT	chr6	10226256	10226256	C	A	ARPC1A	SNP	exonic	Missense_Mutation	ENSCAFT00000036371.4	exon3	c.G337T	p.V113F
207MAR	FL	INDOLENT	chr14	55723990	55723998	AGGCTGGAG	A	MET	NA	UTR3	3'UTR	-	-	-	-
208PAN	B-SLL	INDOLENT	chr13	25203042	25203042	C	T	MYC	SNP	exonic	Missense_Mutation	ENSCAFT00000001656.4	exon2	c.C215T	p.P72L
208PAN	B-SLL	INDOLENT	chr14	55598711	55598711	A	G	MET	SNP	UTR5	5'UTR	-	-	-	-
208PAN	B-SLL	INDOLENT	chr18	41635323	41635323	G	A	PTPRJ	SNP	upstream	5'Flank	-	-	-	-
208PAN	B-SLL	INDOLENT	chr9	22785212	22785212	T	G	ERBB2	SNP	UTR5	5'UTR	-	-	-	-
20VIL	DLBCL	AGGRESSIVE	chr14	11043401	11043401	G	A	POT1	SNP	exonic	Missense_Mutation	ENSCAFT00000080986.1	exon6	c.G428A	p.R143Q
20VIL	DLBCL	AGGRESSIVE	chr15	50417188	50417188	C	T	FBXW7	SNP	exonic	Missense_Mutation	ENSCAFT00000082966.1	exon1	c.G8A	p.S3N
20VIL	DLBCL	AGGRESSIVE	chr19	15330599	15330599	T	A	FAT4	SNP	exonic	Missense_Mutation	ENSCAFT00000006363.5	exon1	c.A1447T	p.N483Y
20VIL	DLBCL	AGGRESSIVE	chr6	10226256	10226256	C	A	ARPC1A	SNP	exonic	Missense_Mutation	ENSCAFT00000036371.4	exon3	c.G337T	p.V113F
20VIL	DLBCL	AGGRESSIVE	chr9	18280218	18280218	A	G	MAP3K14	SNP	exonic	Translation_Start_Site	ENSCAFT00000021854.4	exon1	c.A1G	p.M1?
20VIL	DLBCL	AGGRESSIVE	chrX	35770528	35770528	G	A	DDX3X	SNP	exonic	Missense_Mutation	ENSCAFT00000061818.1	exon9	c.G838A	p.D280N
20VIL	DLBCL	AGGRESSIVE	chr26	37844610	37844610	A	C	PTEN	SNP	intronic	Intron	-	-	-	-
20VIL	DLBCL	AGGRESSIVE	chrX	35766057	35766057	C	CT	DDX3X	NA	intronic	Intron	-	-	-	-
212ANG	B-SLL	INDOLENT	chr5	32563413	32563413	A	G	TP53	SNP	exonic	Missense_Mutation	ENSCAFT00000086831.1	exon5	c.T616C	p.S206P
212ANG	B-SLL	INDOLENT	chr20	41675690	41675690	T	C	SETD2	SNP	intronic	Intron	-	-	-	-
212ANG	B-SLL	INDOLENT	chr5	32565810	32565810	G	A	TP53	SNP	intronic	Intron	-	-	-	-
212ANG	B-SLL	INDOLENT	chr6	10232363	10232363	T	A	ARPC1A	SNP	intronic	Intron	-	-	-	-
212ANG	B-SLL	INDOLENT	chr9	22759958	22759958	G	GT	ERBB2	NA	UTR3	3'UTR	-	-	-	-
213BAS	DLBCL	AGGRESSIVE	chr14	11066334	11066334	C	T	POT1	SNP	exonic	Missense_Mutation	ENSCAFT00000080986.1	exon15	c.C1445T	p.S482L
213BAS	DLBCL	AGGRESSIVE	chr34	40582899	40582899	G	T	TBL1XR1	SNP	exonic	Missense_Mutation	ENSCAFT00000024648.5	exon14	c.C1256A	p.S419Y
213BAS	DLBCL	AGGRESSIVE	chr2	53516425	53516425	A	T	PIK3R1	SNP	intronic	Intron	-	-	-	-
213BAS	DLBCL	AGGRESSIVE	chr8	70776843	70776843	G	GC	TRAF3	NA	exonic	Frame_Shift_Ins	ENSCAFT00000028719.4	exon7	c.682delinsGC	p.S230Qfs*4
214BOC	DLBCL	AGGRESSIVE	chr14	11037882	11037882	A	C	POT1	SNP	exonic	Missense_Mutation	ENSCAFT00000080986.1	exon5	c.A263C	p.D88A
214BOC	DLBCL	AGGRESSIVE	chr14	55627538	55627538	C	T	MET	SNP	exonic	Missense_Mutation	ENSCAFT00000005469.3	exon2	c.C1202T	p.A401V
214BOC	DLBCL	AGGRESSIVE	chr24	29211682	29211682	G	C	PLCG1	SNP	exonic	Missense_Mutation	ENSCAFT00000014441.2	exon29	c.G3412C	p.V1138L
214BOC	DLBCL	AGGRESSIVE	chr27	5538563	5538563	G	A	KMT2D	SNP	exonic	Missense_Mutation	ENSCAFT00000045185.2	exon33	c.G9461A	p.R3154H
214BOC	DLBCL	AGGRESSIVE	chr8	70788125	70788125	C	T	TRAF3	SNP	exonic	Nonsense_Mutation	ENSCAFT00000085506.1	exon7	c.C829T	p.R277X
214BOC	DLBCL	AGGRESSIVE	chr27	5535253	5535253	G	T	KMT2D	SNP	intronic	Intron	-	-	-	-
215CAC	DLBCL	AGGRESSIVE	chr14	11056553	11056553	T	A	POT1	SNP	exonic	Missense_Mutation	ENSCAFT00000080986.1	exon11	c.T1046A	p.V349E
215CAC	DLBCL	AGGRESSIVE	chr15	50192584	50192584	C	T	FBXW7	SNP	exonic	Missense_Mutation	ENSCAFT00000012962.5	exon9	c.G1577A	p.R526Q
215CAC	DLBCL	AGGRESSIVE	chr8	70789295	70789295	A	T	TRAF3	SNP	exonic	Nonsense_Mutation	ENSCAFT00000085506.1	exon8	c.A1108T	p.K370X
215CAC	DLBCL	AGGRESSIVE	chr34	40582685	40582685	C	T	TBL1XR1	SNP	intronic	Intron	-	-	-	-
215CAC	DLBCL	AGGRESSIVE	chr34	40739301	40739301	G	A	TBL1XR1	SNP	UTR5	5'UTR	-	-	-	-
215CAC	DLBCL	AGGRESSIVE	chr9	22759958	22759958	G	GT	ERBB2	NA	UTR3	3'UTR	-	-	-	-
216CRI	DLBCL	AGGRESSIVE	chr13	25203053	25203053	C	G	MYC	SNP	exonic	Missense_Mutation	ENSCAFT00000001656.4	exon2	c.C226G	p.P76A
216CRI	DLBCL	AGGRESSIVE	chr14	11011641	11011641	G	T	POT1	SNP	exonic	Missense_Mutation	ENSCAFT00000082826.1	exon2	c.G204T	p.L68F
216CRI	DLBCL	AGGRESSIVE	chr6	10226256	10226256	C	A	ARPC1A	SNP	exonic	Missense_Mutation	ENSCAFT00000036371.4	exon3	c.G337T	p.V113F
216CRI	DLBCL	AGGRESSIVE	chr8	70789197	70789197	G	A	TRAF3	SNP	exonic	Nonsense_Mutation	ENSCAFT00000085506.1	exon8	c.G1010A	p.W337X
216CRI	DLBCL	AGGRESSIVE	chr8	70789325	70789325	G	A	TRAF3	SNP	exonic	Missense_Mutation	ENSCAFT00000085506.1	exon8	c.G1138A	p.D380N
217BRE	DLBCL	AGGRESSIVE	chr15	50192507	50192507	G	A	FBXW7	SNP	exonic	Missense_Mutation	ENSCAFT00000012962.5	exon9	c.C1654T	p.R552C
217BRE	DLBCL	AGGRESSIVE	chr2	53520330	53520330	C	G	PIK3R1	SNP	intronic	Intron	-	-	-	-
217BRE	DLBCL	AGGRESSIVE	chr27	5539458	5539461	TCAG	T	KMT2D	NA	exonic	In_Frame_Del	ENSCAFT00000045185.2	exon33	c.10356_10359delinsT	p.Q3464del
219MAL	B-LL	AGGRESSIVE	chr14	55598711	55598711	A	G	MET	SNP	UTR5	5'UTR	-	-	-	-
219MAL	B-LL	AGGRESSIVE	chr18	41586377	41586378	CA	C	PTPRJ	NA	UTR3	3'UTR	-	-	-	-
219MAL	B-LL	AGGRESSIVE	chr18	41635323	41635323	G	A	PTPRJ	SNP	upstream	5'Flank	-	-	-	-
219MAL	B-LL	AGGRESSIVE	chr2	53516426	53516426	T	A	PIK3R1	SNP	intronic	Intron	-	-	-	-
219MAL	B-LL	AGGRESSIVE	chr9	22759958	22759958	G	GT	ERBB2	NA	UTR3	3'UTR	-	-	-	-
21VSL	DLBCL	AGGRESSIVE	chr19	15196375	15196375	C	T	FAT4	SNP	exonic	Missense_Mutation	ENSCAFT00000006363.5	exon9	c.G10666A	p.A3556T
21VSL	DLBCL	AGGRESSIVE	chr34	40583552	40583552	T	C	TBL1XR1	SNP	exonic	Missense_Mutation	ENSCAFT00000024648.5	exon13	c.A1184G	p.Y395C
21VSL	DLBCL	AGGRESSIVE	chr5	32563388	32563388	C	T	TP53	SNP	exonic	Missense_Mutation	ENSCAFT00000086831.1	exon5	c.G641A	p.R214Q
21VSL	DLBCL	AGGRESSIVE	chrX	35766057	35766057	C	CT	DDX3X	NA	intronic	Intron	-	-	-	-
220PAN	B-LL	AGGRESSIVE	chr14	11033642	11033642	A	T	POT1	SNP	exonic	Nonsense_Mutation	ENSCAFT00000086242.1	exon5	c.A421T	p.K141X
220PAN	B-LL	AGGRESSIVE	chr18	41630184	41630184	T	C	PTPRJ	SNP	intronic	Intron	-	-	-	-
220PAN	B-LL	AGGRESSIVE	chr2	53516425	53516425	A	T	PIK3R1	SNP	intronic	Intron	-	-	-	-
220PAN	B-LL	AGGRESSIVE	chr2	53524868	53524869	AT	A	PIK3R1	NA	UTR3	3'UTR	-	-	-	-
220PAN	B-LL	AGGRESSIVE	chr13	25203030	25203045	TGCTGCCCACCCCGCC	T	MYC	NA	exonic	In_Frame_Del	ENSCAFT00000001656.4	exon2	c.203_218delinsT	p.P70_L74del
220PAN	B-LL	AGGRESSIVE	chr8	70789344	70789344	C	CGCACT	TRAF3	NA	exonic	Frame_Shift_Ins	ENSCAFT00000085506.1	exon8	c.1157delinsCGCACT	p.L388Cfs*26
221PIN	FL	INDOLENT	chr13	25203041	25203041	C	G	MYC	SNP	exonic	Missense_Mutation	ENSCAFT00000001656.4	exon2	c.C214G	p.P72A
221PIN	FL	INDOLENT	chr6	10226256	10226256	C	A	ARPC1A	SNP	exonic	Missense_Mutation	ENSCAFT00000036371.4	exon3	c.G337T	p.V113F
222SCA	BL	AGGRESSIVE	chr5	32563971	32563971	C	A	TP53	SNP	exonic	Missense_Mutation	ENSCAFT00000086831.1	exon3	c.G361T	p.V121F
222SCA	BL	AGGRESSIVE	chr6	10226256	10226256	C	A	ARPC1A	SNP	exonic	Missense_Mutation	ENSCAFT00000036371.4	exon3	c.G337T	p.V113F
222SCA	BL	AGGRESSIVE	chr2	53516425	53516425	A	T	PIK3R1	SNP	intronic	Intron	-	-	-	-
222SCA	BL	AGGRESSIVE	chr2	53516426	53516426	T	A	PIK3R1	SNP	intronic	Intron	-	-	-	-
222SCA	BL	AGGRESSIVE	chr2	53524868	53524869	AT	A	PIK3R1	NA	UTR3	3'UTR	-	-	-	-
222SCA	BL	AGGRESSIVE	chr34	40656856	40656856	C	T	TBL1XR1	SNP	UTR5	5'UTR	-	-	-	-
223CEC	MZL	INDOLENT	chr14	11043400	11043400	C	T	POT1	SNP	exonic	Missense_Mutation	ENSCAFT00000080986.1	exon6	c.C427T	p.R143W
223CEC	MZL	INDOLENT	chr15	50194596	50194596	G	A	FBXW7	SNP	exonic	Missense_Mutation	ENSCAFT00000012962.5	exon8	c.C1534T	p.R512C
223CEC	MZL	INDOLENT	chr8	70776857	70776857	T	A	TRAF3	SNP	exonic	Nonsense_Mutation	ENSCAFT00000028719.4	exon7	c.T696A	p.C232X
223CEC	MZL	INDOLENT	chrX	35771183	35771183	A	C	DDX3X	SNP	exonic	Missense_Mutation	ENSCAFT00000061818.1	exon11	c.A1208C	p.Q403P
223CEC	MZL	INDOLENT	chr2	53524868	53524869	AT	A	PIK3R1	NA	UTR3	3'UTR	-	-	-	-
223CEC	MZL	INDOLENT	chr8	70788183	70788183	G	C	TRAF3	SNP	splicing	Splice_Site	-	-	-	-
224RAC	FL	INDOLENT	chr14	55599225	55599225	G	A	MET	SNP	exonic	Missense_Mutation	ENSCAFT00000005469.3	exon1	c.G25A	p.A9T
224RAC	FL	INDOLENT	chr2	53524868	53524869	AT	A	PIK3R1	NA	UTR3	3'UTR	-	-	-	-
224RAC	FL	INDOLENT	chr8	70790001	70790005	AACAC	A	TRAF3	NA	UTR3	3'UTR	-	-	-	-
224RAC	FL	INDOLENT	chr9	22759958	22759958	G	GT	ERBB2	NA	UTR3	3'UTR	-	-	-	-
225DOB	DLBCL	AGGRESSIVE	chr13	47189792	47189792	G	A	KIT	SNP	exonic	Silent	ENSCAFT00000003274.4	exon21	c.G2889A	p.A963A
225DOB	DLBCL	AGGRESSIVE	chr14	55598711	55598711	A	G	MET	SNP	UTR5	5'UTR	-	-	-	-
225DOB	DLBCL	AGGRESSIVE	chr18	41586377	41586378	CA	C	PTPRJ	NA	UTR3	3'UTR	-	-	-	-
225DOB	DLBCL	AGGRESSIVE	chr18	41607197	41607197	G	T	PTPRJ	SNP	intronic	Intron	-	-	-	-
225DOB	DLBCL	AGGRESSIVE	chr2	53516425	53516425	A	T	PIK3R1	SNP	intronic	Intron	-	-	-	-
226FAL	MZL	INDOLENT	chr14	11063794	11063794	T	G	POT1	SNP	exonic	Missense_Mutation	ENSCAFT00000080986.1	exon14	c.T1315G	p.F439V
226FAL	MZL	INDOLENT	chr6	10226256	10226256	C	A	ARPC1A	SNP	exonic	Missense_Mutation	ENSCAFT00000036371.4	exon3	c.G337T	p.V113F
226FAL	MZL	INDOLENT	chr27	5525667	5525667	A	G	KMT2D	SNP	exonic	Silent	ENSCAFT00000013872.6	exon10	c.A2250G	p.P750P
226FAL	MZL	INDOLENT	chr27	5525685	5525685	C	T	KMT2D	SNP	exonic	Silent	ENSCAFT00000013872.6	exon10	c.C2268T	p.P756P
226FAL	MZL	INDOLENT	chr8	70782970	70782970	A	ACAGTG	TRAF3	NA	exonic	Frame_Shift_Ins	ENSCAFT00000085506.1	exon6	c.626delinsACAGTG	p.N210Sfs*32
228KAR	DLBCL	AGGRESSIVE	chr14	11033768	11033768	G	T	POT1	SNP	exonic	Missense_Mutation	ENSCAFT00000080986.1	exon4	c.G94T	p.D32Y
228KAR	DLBCL	AGGRESSIVE	chr19	15195273	15195273	C	T	FAT4	SNP	exonic	Missense_Mutation	ENSCAFT00000006363.5	exon9	c.G11768A	p.S3923N
228KAR	DLBCL	AGGRESSIVE	chr9	22776493	22776493	G	A	ERBB2	SNP	exonic	Missense_Mutation	ENSCAFT00000025936.4	exon4	c.C497T	p.T166M
228KAR	DLBCL	AGGRESSIVE	chr11	56257184	56257184	G	A	SEC61B	SNP	intronic	Intron	-	-	-	-
228KAR	DLBCL	AGGRESSIVE	chr14	55723779	55723779	G	C	MET	SNP	UTR3	3'UTR	-	-	-	-
228KAR	DLBCL	AGGRESSIVE	chr14	55723789	55723789	A	G	MET	SNP	UTR3	3'UTR	-	-	-	-
228KAR	DLBCL	AGGRESSIVE	chr14	55723796	55723796	A	T	MET	SNP	UTR3	3'UTR	-	-	-	-
228KAR	DLBCL	AGGRESSIVE	chr14	55723919	55723919	G	A	MET	SNP	UTR3	3'UTR	-	-	-	-
228KAR	DLBCL	AGGRESSIVE	chr14	55723926	55723926	T	A	MET	SNP	UTR3	3'UTR	-	-	-	-
228KAR	DLBCL	AGGRESSIVE	chr14	55723987	55723987	A	T	MET	SNP	UTR3	3'UTR	-	-	-	-
228KAR	DLBCL	AGGRESSIVE	chr8	70790001	70790005	AACAC	A	TRAF3	NA	UTR3	3'UTR	-	-	-	-
228KAR	DLBCL	AGGRESSIVE	chr5	32564036	32564037	CA	C	TP53	NA	exonic	Frame_Shift_Del	ENSCAFT00000086831.1	exon3	c.295_296delinsG	p.C99Afs*35
229LAN	DLBCL	AGGRESSIVE	chr13	25203041	25203041	C	G	MYC	SNP	exonic	Missense_Mutation	ENSCAFT00000001656.4	exon2	c.C214G	p.P72A
229LAN	DLBCL	AGGRESSIVE	chr9	18280461	18280461	G	C	MAP3K14	SNP	exonic	Missense_Mutation	ENSCAFT00000021854.4	exon1	c.G244C	p.A82P
229LAN	DLBCL	AGGRESSIVE	chrX	35771170	35771170	G	A	DDX3X	SNP	exonic	Missense_Mutation	ENSCAFT00000061818.1	exon11	c.G1195A	p.G399R
229LAN	DLBCL	AGGRESSIVE	chr15	50214772	50214773	CA	C	FBXW7	NA	intronic	Intron	-	-	-	-
22TRT	DLBCL	AGGRESSIVE	chr14	11051339	11051339	C	T	POT1	SNP	exonic	Nonsense_Mutation	ENSCAFT00000080986.1	exon9	c.C691T	p.Q231X
22TRT	DLBCL	AGGRESSIVE	chr34	40739301	40739301	G	A	TBL1XR1	SNP	UTR5	5'UTR	-	-	-	-
22TRT	DLBCL	AGGRESSIVE	chr15	50281974	50281975	TC	T	FBXW7	NA	exonic	Frame_Shift_Del	ENSCAFT00000012962.5	exon1	c.445_446delinsA	p.E149Kfs*67
230MAR	DLBCL	AGGRESSIVE	chr15	50190730	50190730	G	T	FBXW7	SNP	exonic	Missense_Mutation	ENSCAFT00000012962.5	exon10	c.C1937A	p.A646E
230MAR	DLBCL	AGGRESSIVE	chr15	50192507	50192507	G	A	FBXW7	SNP	exonic	Missense_Mutation	ENSCAFT00000012962.5	exon9	c.C1654T	p.R552C
230MAR	DLBCL	AGGRESSIVE	chr15	50417171	50417171	G	A	FBXW7	SNP	exonic	Nonsense_Mutation	ENSCAFT00000082966.1	exon1	c.C25T	p.R9X
230MAR	DLBCL	AGGRESSIVE	chr20	41768992	41768992	C	T	SETD2	SNP	exonic	Nonsense_Mutation	ENSCAFT00000021260.4	exon15	c.C6319T	p.R2107X
230MAR	DLBCL	AGGRESSIVE	chr8	70789358	70789358	T	G	TRAF3	SNP	exonic	Missense_Mutation	ENSCAFT00000085506.1	exon8	c.T1171G	p.F391V
230MAR	DLBCL	AGGRESSIVE	chr18	41586377	41586378	CA	C	PTPRJ	NA	UTR3	3'UTR	-	-	-	-
230MAR	DLBCL	AGGRESSIVE	chr18	41635323	41635323	G	A	PTPRJ	SNP	upstream	5'Flank	-	-	-	-
230MAR	DLBCL	AGGRESSIVE	chr34	40739301	40739301	G	A	TBL1XR1	SNP	UTR5	5'UTR	-	-	-	-
231OND	DLBCL	AGGRESSIVE	chr13	25203303	25203303	C	T	MYC	SNP	exonic	Missense_Mutation	ENSCAFT00000001656.4	exon2	c.C476T	p.S159L
231OND	DLBCL	AGGRESSIVE	chr18	41635323	41635323	G	A	PTPRJ	SNP	upstream	5'Flank	-	-	-	-
231OND	DLBCL	AGGRESSIVE	chr19	15174089	15174089	G	T	FAT4	SNP	intronic	Intron	-	-	-	-
231OND	DLBCL	AGGRESSIVE	chr27	5535253	5535253	G	T	KMT2D	SNP	intronic	Intron	-	-	-	-
231OND	DLBCL	AGGRESSIVE	chr34	40739265	40739265	A	G	TBL1XR1	SNP	UTR5	5'UTR	-	-	-	-
232PAL	DLBCL	AGGRESSIVE	chr14	11014698	11014698	G	A	POT1	SNP	exonic	Missense_Mutation	ENSCAFT00000086242.1	exon3	c.G184A	p.D62N
232PAL	DLBCL	AGGRESSIVE	chr15	50192584	50192584	C	T	FBXW7	SNP	exonic	Missense_Mutation	ENSCAFT00000012962.5	exon9	c.G1577A	p.R526Q
232PAL	DLBCL	AGGRESSIVE	chr19	15331494	15331494	G	A	FAT4	SNP	exonic	Silent	ENSCAFT00000006363.5	exon1	c.C552T	p.R184R
232PAL	DLBCL	AGGRESSIVE	chr9	18292645	18292645	G	T	MAP3K14	SNP	exonic	Missense_Mutation	ENSCAFT00000088008.1	exon5	c.G1160T	p.R387L
232PAL	DLBCL	AGGRESSIVE	chr13	25201190	25201190	G	A	MYC	SNP	intronic	Intron	-	-	-	-
232PAL	DLBCL	AGGRESSIVE	chr2	53516426	53516426	T	A	PIK3R1	SNP	intronic	Intron	-	-	-	-
232PAL	DLBCL	AGGRESSIVE	chr27	5535253	5535253	G	T	KMT2D	SNP	intronic	Intron	-	-	-	-
232PAL	DLBCL	AGGRESSIVE	chr9	18280460	18280477	CGCCCAGGCGGAATGTAA	C	MAP3K14	NA	exonic	Frame_Shift_Del	ENSCAFT00000021854.4	exon1	c.243_256delinsC	p.A82Vfs*62
233CER	DLBCL	AGGRESSIVE	chr13	25203045	25203045	C	A	MYC	SNP	exonic	Missense_Mutation	ENSCAFT00000001656.4	exon2	c.C218A	p.P73Q
233CER	DLBCL	AGGRESSIVE	chr14	55598711	55598711	A	G	MET	SNP	UTR5	5'UTR	-	-	-	-
233CER	DLBCL	AGGRESSIVE	chr15	50214772	50214773	CA	C	FBXW7	NA	intronic	Intron	-	-	-	-
233CER	DLBCL	AGGRESSIVE	chr2	53524868	53524869	AT	A	PIK3R1	NA	UTR3	3'UTR	-	-	-	-
234AGO	FL	INDOLENT	chr2	53516486	53516490	GTGTA	G	PIK3R1	NA	exonic	Translation_Start_Site	ENSCAFT00000068054.1	exon1	c.A1G	p.M1?
234AGO	FL	INDOLENT	chr20	41711491	41711491	G	A	SETD2	SNP	exonic	Missense_Mutation	ENSCAFT00000021260.4	exon3	c.G1781A	p.G594D
234AGO	FL	INDOLENT	chr13	47467577	47467577	A	G	KDR	SNP	intronic	Intron	-	-	-	-
234AGO	FL	INDOLENT	chr15	50214772	50214773	CA	C	FBXW7	NA	intronic	Intron	-	-	-	-
234AGO	FL	INDOLENT	chr2	53516425	53516425	A	T	PIK3R1	SNP	intronic	Intron	-	-	-	-
234AGO	FL	INDOLENT	chr24	29210409	29210409	G	A	PLCG1	SNP	intronic	Intron	-	-	-	-
235MAG	FL	INDOLENT	chr15	50417188	50417188	C	T	FBXW7	SNP	exonic	Missense_Mutation	ENSCAFT00000082966.1	exon1	c.G8A	p.S3N
235MAG	FL	INDOLENT	chrX	35769774	35769774	T	G	DDX3X	SNP	exonic	Missense_Mutation	ENSCAFT00000061818.1	exon8	c.T695G	p.I232R
235MAG	FL	INDOLENT	chr15	50214772	50214773	CA	C	FBXW7	NA	intronic	Intron	-	-	-	-
235MAG	FL	INDOLENT	chr34	40739301	40739301	G	A	TBL1XR1	SNP	UTR5	5'UTR	-	-	-	-
235MAG	FL	INDOLENT	chr34	40587295	40587298	CAAG	C	TBL1XR1	NA	exonic	In_Frame_Del	ENSCAFT00000024648.5	exon11	c.971_974delinsG	p.S324del
236BEV	FL	INDOLENT	chr15	50417267	50417267	A	T	FBXW7	SNP	upstream	5'Flank	-	-	-	-
236BEV	FL	INDOLENT	chr27	22258077	22258077	A	G	KRAS	SNP	UTR5	5'UTR	-	-	-	-
236BEV	FL	INDOLENT	chr34	40739301	40739301	G	A	TBL1XR1	SNP	UTR5	5'UTR	-	-	-	-
237PEZ	FL	INDOLENT	chr14	11030319	11030319	G	A	POT1	SNP	exonic	Missense_Mutation	ENSCAFT00000086242.1	exon4	c.G299A	p.R100H
237PEZ	FL	INDOLENT	chr19	15330599	15330599	T	A	FAT4	SNP	exonic	Missense_Mutation	ENSCAFT00000006363.5	exon1	c.A1447T	p.N483Y
237PEZ	FL	INDOLENT	chr27	5548898	5548898	C	T	KMT2D	SNP	exonic	Missense_Mutation	ENSCAFT00000045185.2	exon47	c.C15755T	p.A5252V
237PEZ	FL	INDOLENT	chr14	55598711	55598711	A	G	MET	SNP	UTR5	5'UTR	-	-	-	-
237PEZ	FL	INDOLENT	chr20	57559531	57559531	G	A	STK11	SNP	UTR3	3'UTR	-	-	-	-
238LAR	FL	INDOLENT	chr34	40582767	40582767	T	C	TBL1XR1	SNP	exonic	Missense_Mutation	ENSCAFT00000024648.5	exon14	c.A1388G	p.D463G
239IAC	DLBCL	AGGRESSIVE	chr34	40595655	40595655	C	T	TBL1XR1	SNP	exonic	Missense_Mutation	ENSCAFT00000024648.5	exon9	c.G854A	p.G285E
239IAC	DLBCL	AGGRESSIVE	chr9	18280461	18280461	G	C	MAP3K14	SNP	exonic	Missense_Mutation	ENSCAFT00000021854.4	exon1	c.G244C	p.A82P
239IAC	DLBCL	AGGRESSIVE	chr14	55598711	55598711	A	G	MET	SNP	UTR5	5'UTR	-	-	-	-
239IAC	DLBCL	AGGRESSIVE	chr15	50214772	50214773	CA	C	FBXW7	NA	intronic	Intron	-	-	-	-
239IAC	DLBCL	AGGRESSIVE	chr26	37884062	37884062	A	C	PTEN	SNP	exonic	RNA	-	-	-	-
239IAC	DLBCL	AGGRESSIVE	chr29	17808648	17808648	C	T	PREX2	SNP	intergenic	IGR	-	-	-	-
239IAC	DLBCL	AGGRESSIVE	chr34	40738884	40738884	A	G	TBL1XR1	SNP	UTR5	5'UTR	-	-	-	-
23TOS	DLBCL	AGGRESSIVE	chr15	50190781	50190781	G	A	FBXW7	SNP	exonic	Missense_Mutation	ENSCAFT00000012962.5	exon10	c.C1886T	p.S629L
23TOS	DLBCL	AGGRESSIVE	chr15	50194722	50194722	C	G	FBXW7	SNP	exonic	Missense_Mutation	ENSCAFT00000012962.5	exon8	c.G1408C	p.G470R
23TOS	DLBCL	AGGRESSIVE	chr27	5543213	5543213	G	A	KMT2D	SNP	exonic	Missense_Mutation	ENSCAFT00000045185.2	exon38	c.G12247A	p.A4083T
23TOS	DLBCL	AGGRESSIVE	chrX	35770538	35770538	T	C	DDX3X	SNP	exonic	Missense_Mutation	ENSCAFT00000061818.1	exon9	c.T848C	p.F283S
23TOS	DLBCL	AGGRESSIVE	chr14	11044523	11044523	G	A	POT1	SNP	splicing	Splice_Site	-	-	-	-
23TOS	DLBCL	AGGRESSIVE	chr14	55598711	55598711	A	G	MET	SNP	UTR5	5'UTR	-	-	-	-
23TOS	DLBCL	AGGRESSIVE	chr2	53520325	53520325	C	T	PIK3R1	SNP	intronic	Intron	-	-	-	-
23TOS	DLBCL	AGGRESSIVE	chr9	22759958	22759958	G	GT	ERBB2	NA	UTR3	3'UTR	-	-	-	-
23TOS	DLBCL	AGGRESSIVE	chr8	70789151	70789152	CG	C	TRAF3	NA	exonic	Frame_Shift_Del	ENSCAFT00000085506.1	exon8	c.964_965delinsC	p.R322Pfs*14
240DAR	BL	AGGRESSIVE	chr34	40595709	40595709	C	A	TBL1XR1	SNP	exonic	Missense_Mutation	ENSCAFT00000024648.5	exon9	c.G800T	p.G267V
240DAR	BL	AGGRESSIVE	chr14	55598711	55598711	A	G	MET	SNP	UTR5	5'UTR	-	-	-	-
240DAR	BL	AGGRESSIVE	chr14	55723990	55723998	AGGCTGGAG	A	MET	NA	UTR3	3'UTR	-	-	-	-
240DAR	BL	AGGRESSIVE	chr15	50250969	50250969	A	G	FBXW7	SNP	intronic	Intron	-	-	-	-
240DAR	BL	AGGRESSIVE	chr23	24688393	24688393	C	T	SATB1	SNP	UTR3	3'UTR	-	-	-	-
240DAR	BL	AGGRESSIVE	chr5	32564066	32564066	T	C	TP53	SNP	splicing	Splice_Site	-	-	-	-
240DAR	BL	AGGRESSIVE	chr15	50417189	50417190	TC	T	FBXW7	NA	exonic	Frame_Shift_Del	ENSCAFT00000082966.1	exon1	c.6_7delinsA	p.S3Afs*45
241BEV	MZL	INDOLENT	chr15	50197283	50197283	T	TATCA	FBXW7	NA	exonic	Nonsense_Mutation	ENSCAFT00000012962.5	exon6	c.1228delinsTGATA	p.T410*
241BEV	MZL	INDOLENT	chr15	50205050	50205050	C	T	FBXW7	SNP	exonic	Nonsense_Mutation	ENSCAFT00000012962.5	exon4	c.G872A	p.W291X
241BEV	MZL	INDOLENT	chr8	70783008	70783008	C	T	TRAF3	SNP	exonic	Nonsense_Mutation	ENSCAFT00000085506.1	exon6	c.C664T	p.Q222X
241BEV	MZL	INDOLENT	chr8	70788079	70788079	G	A	TRAF3	SNP	exonic	Nonsense_Mutation	ENSCAFT00000085506.1	exon7	c.G783A	p.W261X
241BEV	MZL	INDOLENT	chr14	11037929	11037929	G	A	POT1	SNP	splicing	Splice_Site	-	-	-	-
241BEV	MZL	INDOLENT	chr14	55598711	55598711	A	G	MET	SNP	UTR5	5'UTR	-	-	-	-
242DON	FL	INDOLENT	chr15	50190726	50190726	A	T	FBXW7	SNP	exonic	Missense_Mutation	ENSCAFT00000012962.5	exon10	c.T1941A	p.D647E
242DON	FL	INDOLENT	chr15	50194595	50194595	C	T	FBXW7	SNP	exonic	Missense_Mutation	ENSCAFT00000012962.5	exon8	c.G1535A	p.R512H
242DON	FL	INDOLENT	chr20	41726961	41726961	T	G	SETD2	SNP	exonic	Missense_Mutation	ENSCAFT00000021260.4	exon9	c.T5060G	p.L1687R
242DON	FL	INDOLENT	chr20	41726974	41726974	C	A	SETD2	SNP	exonic	Missense_Mutation	ENSCAFT00000021260.4	exon9	c.C5073A	p.N1691K
242DON	FL	INDOLENT	chr27	5545855	5545855	G	A	KMT2D	SNP	exonic	Silent	ENSCAFT00000045185.2	exon41	c.G14475A	p.P4825P
242DON	FL	INDOLENT	chr8	70789322	70789322	G	A	TRAF3	SNP	exonic	Missense_Mutation	ENSCAFT00000085506.1	exon8	c.G1135A	p.G379R
242DON	FL	INDOLENT	chr34	12660730	12660730	T	C	PIK3CA	SNP	exonic	Missense_Mutation	ENSCAFT00000080543.1	exon7	c.T1258C	p.C420R
242DON	FL	INDOLENT	chr14	55598711	55598711	A	G	MET	SNP	UTR5	5'UTR	-	-	-	-
242DON	FL	INDOLENT	chr2	53516425	53516425	A	T	PIK3R1	SNP	intronic	Intron	-	-	-	-
242DON	FL	INDOLENT	chr9	22759958	22759958	G	GT	ERBB2	NA	UTR3	3'UTR	-	-	-	-
243CIO	MZL	INDOLENT	chr9	22770976	22770976	T	A	ERBB2	SNP	exonic	Missense_Mutation	ENSCAFT00000084545.1	exon6	c.A607T	p.T203S
243CIO	MZL	INDOLENT	chr14	55598711	55598711	A	G	MET	SNP	UTR5	5'UTR	-	-	-	-
243CIO	MZL	INDOLENT	chr8	70790001	70790005	AACAC	A	TRAF3	NA	UTR3	3'UTR	-	-	-	-
244TED	FL	INDOLENT	chr15	50194595	50194595	C	T	FBXW7	SNP	exonic	Missense_Mutation	ENSCAFT00000012962.5	exon8	c.G1535A	p.R512H
244TED	FL	INDOLENT	chr13	25200664	25200664	G	A	MYC	SNP	UTR5	5'UTR	-	-	-	-
244TED	FL	INDOLENT	chr14	55598711	55598711	A	G	MET	SNP	UTR5	5'UTR	-	-	-	-
244TED	FL	INDOLENT	chr18	41586377	41586378	CA	C	PTPRJ	NA	UTR3	3'UTR	-	-	-	-
244TED	FL	INDOLENT	chr9	22759958	22759958	G	GT	ERBB2	NA	UTR3	3'UTR	-	-	-	-
245SCH	DLBCL	AGGRESSIVE	chr19	15198851	15198851	A	G	FAT4	SNP	exonic	Silent	ENSCAFT00000006363.5	exon9	c.T8190C	p.I2730I
245SCH	DLBCL	AGGRESSIVE	chrX	35770560	35770560	A	G	DDX3X	SNP	exonic	Missense_Mutation	ENSCAFT00000061818.1	exon9	c.A870G	p.I290M
245SCH	DLBCL	AGGRESSIVE	chrX	35770576	35770576	A	C	DDX3X	SNP	exonic	Missense_Mutation	ENSCAFT00000061818.1	exon9	c.A886C	p.M296L
245SCH	DLBCL	AGGRESSIVE	chr14	55723990	55723998	AGGCTGGAG	A	MET	NA	UTR3	3'UTR	-	-	-	-
245SCH	DLBCL	AGGRESSIVE	chr18	41586377	41586378	CA	C	PTPRJ	NA	UTR3	3'UTR	-	-	-	-
245SCH	DLBCL	AGGRESSIVE	chr8	70789310	70789310	G	GTCTT	TRAF3	NA	exonic	Frame_Shift_Ins	ENSCAFT00000085506.1	exon8	c.1123delinsGTCTT	p.Y376Ffs*26
246OLA	FL	INDOLENT	chr27	5523179	5523179	T	A	KMT2D	SNP	exonic	Missense_Mutation	ENSCAFT00000013872.6	exon5	c.T629A	p.L210Q
246OLA	FL	INDOLENT	chr14	55598711	55598711	A	G	MET	SNP	UTR5	5'UTR	-	-	-	-
246OLA	FL	INDOLENT	chr15	50214772	50214773	CA	C	FBXW7	NA	intronic	Intron	-	-	-	-
246OLA	FL	INDOLENT	chr16	8317530	8317530	C	T	BRAF	SNP	UTR3	3'UTR	-	-	-	-
246OLA	FL	INDOLENT	chr8	70790001	70790005	AACAC	A	TRAF3	NA	UTR3	3'UTR	-	-	-	-
247BER	DLBCL	AGGRESSIVE	chr14	11056534	11056534	T	C	POT1	SNP	exonic	Missense_Mutation	ENSCAFT00000080986.1	exon11	c.T1027C	p.F343L
247BER	DLBCL	AGGRESSIVE	chr15	50417188	50417188	C	T	FBXW7	SNP	exonic	Missense_Mutation	ENSCAFT00000082966.1	exon1	c.G8A	p.S3N
247BER	DLBCL	AGGRESSIVE	chr15	50214772	50214773	CA	C	FBXW7	NA	intronic	Intron	-	-	-	-
247BER	DLBCL	AGGRESSIVE	chr16	8262510	8262510	T	A	BRAF	SNP	intronic	Intron	-	-	-	-
247BER	DLBCL	AGGRESSIVE	chr18	41586377	41586378	CA	C	PTPRJ	NA	UTR3	3'UTR	-	-	-	-
247BER	DLBCL	AGGRESSIVE	chr20	41675690	41675690	T	C	SETD2	SNP	intronic	Intron	-	-	-	-
247BER	DLBCL	AGGRESSIVE	chr34	40579464	40579464	C	T	TBL1XR1	SNP	intronic	Intron	-	-	-	-
248CHI	BL	AGGRESSIVE	chr19	15159841	15159841	G	A	FAT4	SNP	exonic	Missense_Mutation	ENSCAFT00000059626.1	exon16	c.C13925T	p.P4642L
248CHI	BL	AGGRESSIVE	chr19	15195337	15195337	C	G	FAT4	SNP	exonic	Missense_Mutation	ENSCAFT00000006363.5	exon9	c.G11704C	p.D3902H
248CHI	BL	AGGRESSIVE	chr5	32563028	32563028	C	T	TP53	SNP	exonic	Missense_Mutation	ENSCAFT00000086831.1	exon6	c.G740A	p.R247H
248CHI	BL	AGGRESSIVE	chrX	35772210	35772210	C	T	DDX3X	SNP	exonic	Nonsense_Mutation	ENSCAFT00000061818.1	exon14	c.C1585T	p.R529X
248CHI	BL	AGGRESSIVE	chr14	55598711	55598711	A	G	MET	SNP	UTR5	5'UTR	-	-	-	-
248CHI	BL	AGGRESSIVE	chr34	40739301	40739301	G	A	TBL1XR1	SNP	UTR5	5'UTR	-	-	-	-
248CHI	BL	AGGRESSIVE	chr9	22759958	22759958	G	GT	ERBB2	NA	UTR3	3'UTR	-	-	-	-
249DEP	DLBCL	AGGRESSIVE	chr15	50192584	50192584	C	T	FBXW7	SNP	exonic	Missense_Mutation	ENSCAFT00000012962.5	exon9	c.G1577A	p.R526Q
249DEP	DLBCL	AGGRESSIVE	chr8	70788008	70788008	C	T	TRAF3	SNP	exonic	Nonsense_Mutation	ENSCAFT00000085506.1	exon7	c.C712T	p.R238X
249DEP	DLBCL	AGGRESSIVE	chr14	55598711	55598711	A	G	MET	SNP	UTR5	5'UTR	-	-	-	-
249DEP	DLBCL	AGGRESSIVE	chr23	24617753	24617753	C	T	SATB1	SNP	intronic	Intron	-	-	-	-
249DEP	DLBCL	AGGRESSIVE	chr9	22759958	22759958	G	GT	ERBB2	NA	UTR3	3'UTR	-	-	-	-
24TON	DLBCL	AGGRESSIVE	chr20	57563641	57563641	C	T	STK11	SNP	intronic	Intron	-	-	-	-
24TON	DLBCL	AGGRESSIVE	chr24	29210409	29210409	G	A	PLCG1	SNP	intronic	Intron	-	-	-	-
24TON	DLBCL	AGGRESSIVE	chr8	70768040	70768040	T	C	TRAF3	SNP	intronic	Intron	-	-	-	-
24TON	DLBCL	AGGRESSIVE	chr18	41604663	41604663	T	TG	PTPRJ	NA	exonic	Frame_Shift_Ins	ENSCAFT00000013154.4	exon16	c.2785delinsCA	p.N929Qfs*9
24TON	DLBCL	AGGRESSIVE	chr8	70789247	70789249	ACC	A	TRAF3	NA	exonic	Frame_Shift_Del	ENSCAFT00000085506.1	exon8	c.1060_1062delinsA	p.L355Vfs*15
250DEL	DLBCL	AGGRESSIVE	chr14	11030307	11030307	G	A	POT1	SNP	exonic	Missense_Mutation	ENSCAFT00000086242.1	exon4	c.G287A	p.G96E
250DEL	DLBCL	AGGRESSIVE	chr15	50194601	50194601	G	C	FBXW7	SNP	exonic	Missense_Mutation	ENSCAFT00000012962.5	exon8	c.C1529G	p.T510S
250DEL	DLBCL	AGGRESSIVE	chr26	37910069	37910069	G	A	PTEN	SNP	exonic	Missense_Mutation	ENSCAFT00000024821.4	exon7	c.G880A	p.D294N
250DEL	DLBCL	AGGRESSIVE	chr8	70767964	70767964	A	G	TRAF3	SNP	exonic	Missense_Mutation	ENSCAFT00000028719.4	exon5	c.A512G	p.K171R
250DEL	DLBCL	AGGRESSIVE	chr15	50204940	50204940	T	TG	FBXW7	NA	exonic	Frame_Shift_Ins	ENSCAFT00000012962.5	exon4	c.982delinsCA	p.I328Hfs*6
251GAU	DLBCL	AGGRESSIVE	chr14	11056544	11056544	T	A	POT1	SNP	exonic	Missense_Mutation	ENSCAFT00000080986.1	exon11	c.T1037A	p.V346E
251GAU	DLBCL	AGGRESSIVE	chr15	50416599	50416599	C	A	FBXW7	SNP	exonic	Silent	ENSCAFT00000082966.1	exon1	c.G597T	p.R199R
251GAU	DLBCL	AGGRESSIVE	chr34	40587031	40587031	G	A	TBL1XR1	SNP	exonic	Missense_Mutation	ENSCAFT00000024648.5	exon12	c.C1097T	p.S366F
251GAU	DLBCL	AGGRESSIVE	chr8	70789205	70789205	C	T	TRAF3	SNP	exonic	Nonsense_Mutation	ENSCAFT00000085506.1	exon8	c.C1018T	p.R340X
251GAU	DLBCL	AGGRESSIVE	chrX	35769830	35769830	G	A	DDX3X	SNP	exonic	Missense_Mutation	ENSCAFT00000061818.1	exon8	c.G751A	p.G251R
251GAU	DLBCL	AGGRESSIVE	chr14	55723779	55723779	G	C	MET	SNP	UTR3	3'UTR	-	-	-	-
251GAU	DLBCL	AGGRESSIVE	chr14	55723789	55723789	A	G	MET	SNP	UTR3	3'UTR	-	-	-	-
251GAU	DLBCL	AGGRESSIVE	chr14	55723796	55723796	A	T	MET	SNP	UTR3	3'UTR	-	-	-	-
251GAU	DLBCL	AGGRESSIVE	chr14	55723919	55723919	G	A	MET	SNP	UTR3	3'UTR	-	-	-	-
251GAU	DLBCL	AGGRESSIVE	chr14	55723926	55723926	T	A	MET	SNP	UTR3	3'UTR	-	-	-	-
251GAU	DLBCL	AGGRESSIVE	chr14	55723987	55723987	A	T	MET	SNP	UTR3	3'UTR	-	-	-	-
252NOC	DLBCL	AGGRESSIVE	chr14	11043306	11043306	T	A	POT1	SNP	exonic	Nonsense_Mutation	ENSCAFT00000080986.1	exon6	c.T333A	p.Y111X
252NOC	DLBCL	AGGRESSIVE	chr8	70761988	70761988	C	T	TRAF3	SNP	exonic	Missense_Mutation	ENSCAFT00000028719.4	exon2	c.C188T	p.P63L
252NOC	DLBCL	AGGRESSIVE	chr8	70789582	70789582	T	A	TRAF3	SNP	exonic	Nonsense_Mutation	ENSCAFT00000085506.1	exon8	c.T1395A	p.Y465X
252NOC	DLBCL	AGGRESSIVE	chr8	70789584	70789584	T	A	TRAF3	SNP	exonic	Missense_Mutation	ENSCAFT00000085506.1	exon8	c.T1397A	p.I466N
252NOC	DLBCL	AGGRESSIVE	chr17	52411878	52411878	G	GTTCCAA	NRAS	NA	UTR3	3'UTR	-	-	-	-
252NOC	DLBCL	AGGRESSIVE	chr18	41614229	41614229	C	T	PTPRJ	SNP	intronic	Intron	-	-	-	-
252NOC	DLBCL	AGGRESSIVE	chr9	18300217	18300217	C	T	MAP3K14	SNP	intronic	Intron	-	-	-	-
253PIC	DLBCL	AGGRESSIVE	chr13	47188531	47188531	C	T	KIT	SNP	intronic	Intron	-	-	-	-
253PIC	DLBCL	AGGRESSIVE	chr14	11043457	11043457	G	A	POT1	SNP	intronic	Intron	-	-	-	-
253PIC	DLBCL	AGGRESSIVE	chr16	8317422	8317422	G	T	BRAF	SNP	UTR3	3'UTR	-	-	-	-
253PIC	DLBCL	AGGRESSIVE	chr2	53516426	53516426	T	A	PIK3R1	SNP	intronic	Intron	-	-	-	-
253PIC	DLBCL	AGGRESSIVE	chr2	53522782	53522782	G	A	PIK3R1	SNP	intronic	Intron	-	-	-	-
253PIC	DLBCL	AGGRESSIVE	chr2	53524868	53524869	AT	A	PIK3R1	NA	UTR3	3'UTR	-	-	-	-
254PIE	DLBCL	AGGRESSIVE	chr8	70789595	70789595	A	C	TRAF3	SNP	exonic	Missense_Mutation	ENSCAFT00000085506.1	exon8	c.A1408C	p.T470P
254PIE	DLBCL	AGGRESSIVE	chr34	40739301	40739301	G	A	TBL1XR1	SNP	UTR5	5'UTR	-	-	-	-
256RIZ	DLBCL	AGGRESSIVE	chr19	15331836	15331836	G	T	FAT4	SNP	exonic	Missense_Mutation	ENSCAFT00000006363.5	exon1	c.C210A	p.F70L
256RIZ	DLBCL	AGGRESSIVE	chr34	40595699	40595699	A	T	TBL1XR1	SNP	exonic	Missense_Mutation	ENSCAFT00000024648.5	exon9	c.T810A	p.F270L
256RIZ	DLBCL	AGGRESSIVE	chr34	40599982	40599982	C	CTA	TBL1XR1	NA	exonic	Nonsense_Mutation	ENSCAFT00000024648.5	exon5	c.424delinsTAG	p.A142*
256RIZ	DLBCL	AGGRESSIVE	chr8	70789205	70789205	C	T	TRAF3	SNP	exonic	Nonsense_Mutation	ENSCAFT00000085506.1	exon8	c.C1018T	p.R340X
256RIZ	DLBCL	AGGRESSIVE	chrX	35770537	35770537	T	A	DDX3X	SNP	exonic	Missense_Mutation	ENSCAFT00000061818.1	exon9	c.T847A	p.F283I
256RIZ	DLBCL	AGGRESSIVE	chr14	55598711	55598711	A	G	MET	SNP	UTR5	5'UTR	-	-	-	-
256RIZ	DLBCL	AGGRESSIVE	chr14	55723789	55723789	A	G	MET	SNP	UTR3	3'UTR	-	-	-	-
256RIZ	DLBCL	AGGRESSIVE	chr14	55723796	55723796	A	T	MET	SNP	UTR3	3'UTR	-	-	-	-
256RIZ	DLBCL	AGGRESSIVE	chr2	53524868	53524869	AT	A	PIK3R1	NA	UTR3	3'UTR	-	-	-	-
256RIZ	DLBCL	AGGRESSIVE	chr20	41675690	41675690	T	C	SETD2	SNP	intronic	Intron	-	-	-	-
256RIZ	DLBCL	AGGRESSIVE	chr6	50301146	50301147	TG	T	PALMD	NA	intergenic	IGR	-	-	-	-
256RIZ	DLBCL	AGGRESSIVE	chr8	70788183	70788183	G	T	TRAF3	SNP	splicing	Splice_Site	-	-	-	-
256RIZ	DLBCL	AGGRESSIVE	chr13	25203030	25203045	TGCTGCCCACCCCGCC	T	MYC	NA	exonic	In_Frame_Del	ENSCAFT00000001656.4	exon2	c.203_218delinsT	p.P70_L74del
258SED	DLBCL	AGGRESSIVE	chr15	50196067	50196067	T	C	FBXW7	SNP	exonic	Missense_Mutation	ENSCAFT00000012962.5	exon7	c.A1277G	p.H426R
258SED	DLBCL	AGGRESSIVE	chr5	32563967	32563967	C	T	TP53	SNP	exonic	Missense_Mutation	ENSCAFT00000086831.1	exon3	c.G365A	p.R122H
258SED	DLBCL	AGGRESSIVE	chr9	18280411	18280411	G	A	MAP3K14	SNP	exonic	Missense_Mutation	ENSCAFT00000021854.4	exon1	c.G194A	p.G65D
258SED	DLBCL	AGGRESSIVE	chr37	25980202	25980202	G	C	SPEG	SNP	intronic	Intron	-	-	-	-
259STE	DLBCL	AGGRESSIVE	chr13	47473760	47473760	C	T	KDR	SNP	exonic	Missense_Mutation	ENSCAFT00000003300.4	exon6	c.G760A	p.V254I
259STE	DLBCL	AGGRESSIVE	chr14	11033604	11033604	G	A	POT1	SNP	exonic	Missense_Mutation	ENSCAFT00000086242.1	exon5	c.G383A	p.G128E
259STE	DLBCL	AGGRESSIVE	chr15	50192572	50192572	A	G	FBXW7	SNP	exonic	Missense_Mutation	ENSCAFT00000012962.5	exon9	c.T1589C	p.L530P
259STE	DLBCL	AGGRESSIVE	chr15	50196008	50196008	C	G	FBXW7	SNP	exonic	Missense_Mutation	ENSCAFT00000012962.5	exon7	c.G1336C	p.D446H
259STE	DLBCL	AGGRESSIVE	chr18	41586377	41586378	CA	C	PTPRJ	NA	UTR3	3'UTR	-	-	-	-
259STE	DLBCL	AGGRESSIVE	chr2	53516425	53516425	A	T	PIK3R1	SNP	intronic	Intron	-	-	-	-
259STE	DLBCL	AGGRESSIVE	chr20	41713916	41713916	T	TA	SETD2	NA	exonic	Frame_Shift_Ins	ENSCAFT00000021260.4	exon3	c.4206delinsTA	p.R1405Kfs*8
25TAS	DLBCL	AGGRESSIVE	chr9	18280411	18280411	G	C	MAP3K14	SNP	exonic	Missense_Mutation	ENSCAFT00000021854.4	exon1	c.G194C	p.G65A
25TAS	DLBCL	AGGRESSIVE	chr5	32563808	32563808	C	G	TP53	SNP	intronic	Intron	-	-	-	-
260TAR	DLBCL	AGGRESSIVE	chr9	18280468	18280468	C	G	MAP3K14	SNP	exonic	Missense_Mutation	ENSCAFT00000021854.4	exon1	c.C251G	p.A84G
260TAR	DLBCL	AGGRESSIVE	chr18	41586377	41586378	CA	C	PTPRJ	NA	UTR3	3'UTR	-	-	-	-
260TAR	DLBCL	AGGRESSIVE	chr18	41616843	41616843	T	G	PTPRJ	SNP	intronic	Intron	-	-	-	-
260TAR	DLBCL	AGGRESSIVE	chr18	41635323	41635323	G	A	PTPRJ	SNP	upstream	5'Flank	-	-	-	-
260TAR	DLBCL	AGGRESSIVE	chr2	53524868	53524869	AT	A	PIK3R1	NA	UTR3	3'UTR	-	-	-	-
260TAR	DLBCL	AGGRESSIVE	chr20	41675690	41675690	T	C	SETD2	SNP	intronic	Intron	-	-	-	-
261TOM	DLBCL	AGGRESSIVE	chr15	50196016	50196016	C	A	FBXW7	SNP	exonic	Missense_Mutation	ENSCAFT00000012962.5	exon7	c.G1328T	p.S443I
261TOM	DLBCL	AGGRESSIVE	chr8	70789285	70789285	T	A	TRAF3	SNP	exonic	Nonsense_Mutation	ENSCAFT00000085506.1	exon8	c.T1098A	p.Y366X
261TOM	DLBCL	AGGRESSIVE	chr14	11030193	11030193	T	A	POT1	SNP	intronic	Intron	-	-	-	-
261TOM	DLBCL	AGGRESSIVE	chr18	41586377	41586378	CA	C	PTPRJ	NA	UTR3	3'UTR	-	-	-	-
261TOM	DLBCL	AGGRESSIVE	chr2	53516426	53516426	T	A	PIK3R1	SNP	intronic	Intron	-	-	-	-
261TOM	DLBCL	AGGRESSIVE	chr2	53516750	53516750	T	C	PIK3R1	SNP	intronic	Intron	-	-	-	-
261TOM	DLBCL	AGGRESSIVE	chr2	53524868	53524869	AT	A	PIK3R1	NA	UTR3	3'UTR	-	-	-	-
261TOM	DLBCL	AGGRESSIVE	chr5	32560586	32560586	G	A	TP53	SNP	downstream	3'Flank	-	-	-	-
261TOM	DLBCL	AGGRESSIVE	chr6	10213322	10213322	A	T	ARPC1A	SNP	intronic	Intron	-	-	-	-
261TOM	DLBCL	AGGRESSIVE	chr9	22759958	22759958	G	GT	ERBB2	NA	UTR3	3'UTR	-	-	-	-
261TOM	DLBCL	AGGRESSIVE	chr15	50417189	50417190	TC	T	FBXW7	NA	exonic	Frame_Shift_Del	ENSCAFT00000082966.1	exon1	c.6_7delinsA	p.S3Afs*45
262VER	DLBCL	AGGRESSIVE	chr14	11043403	11043403	G	A	POT1	SNP	exonic	Missense_Mutation	ENSCAFT00000080986.1	exon6	c.G430A	p.G144R
262VER	DLBCL	AGGRESSIVE	chr15	50192506	50192506	C	T	FBXW7	SNP	exonic	Missense_Mutation	ENSCAFT00000012962.5	exon9	c.G1655A	p.R552H
262VER	DLBCL	AGGRESSIVE	chr15	50214772	50214773	CA	C	FBXW7	NA	intronic	Intron	-	-	-	-
262VER	DLBCL	AGGRESSIVE	chr2	53516425	53516425	A	T	PIK3R1	SNP	intronic	Intron	-	-	-	-
262VER	DLBCL	AGGRESSIVE	chr34	40582885	40582888	CAGT	C	TBL1XR1	NA	exonic	In_Frame_Del	ENSCAFT00000024648.5	exon14	c.1267_1270delinsG	p.T423del
262VER	DLBCL	AGGRESSIVE	chr8	70778599	70778606	AACTTACT	A	TRAF3	NA	exonic	Frame_Shift_Del	ENSCAFT00000086511.1	exon7	c.706_713delinsA	p.N236Rfs*20
26SPR	DLBCL	AGGRESSIVE	chr14	11043400	11043400	C	T	POT1	SNP	exonic	Missense_Mutation	ENSCAFT00000080986.1	exon6	c.C427T	p.R143W
26SPR	DLBCL	AGGRESSIVE	chr15	8980033	8980033	A	C	ORC1	SNP	exonic	Missense_Mutation	ENSCAFT00000006021.4	exon5	c.A925C	p.N309H
26SPR	DLBCL	AGGRESSIVE	chr19	15159139	15159139	G	A	FAT4	SNP	exonic	Missense_Mutation	ENSCAFT00000059626.1	exon16	c.C14627T	p.P4876L
26SPR	DLBCL	AGGRESSIVE	chr34	40587340	40587340	G	A	TBL1XR1	SNP	exonic	Missense_Mutation	ENSCAFT00000024648.5	exon11	c.C929T	p.P310L
26SPR	DLBCL	AGGRESSIVE	chr8	70789294	70789294	T	G	TRAF3	SNP	exonic	Nonsense_Mutation	ENSCAFT00000085506.1	exon8	c.T1107G	p.Y369X
26SPR	DLBCL	AGGRESSIVE	chr26	37886124	37886124	C	T	PTEN	SNP	exonic	Nonsense_Mutation	ENSCAFT00000024821.4	exon4	c.C292T	p.R98X
26SPR	DLBCL	AGGRESSIVE	chr14	11012157	11012157	G	T	POT1	SNP	UTR5	5'UTR	-	-	-	-
26SPR	DLBCL	AGGRESSIVE	chr14	55598711	55598711	A	G	MET	SNP	UTR5	5'UTR	-	-	-	-
26SPR	DLBCL	AGGRESSIVE	chr14	55598821	55598821	T	C	MET	SNP	UTR5	5'UTR	-	-	-	-
26SPR	DLBCL	AGGRESSIVE	chr34	12663046	12663046	C	T	PIK3CA	SNP	intronic	Intron	-	-	-	-
26SPR	DLBCL	AGGRESSIVE	chr9	22759958	22759958	G	GT	ERBB2	NA	UTR3	3'UTR	-	-	-	-
27GAR	DLBCL	AGGRESSIVE	chr19	15195273	15195273	C	T	FAT4	SNP	exonic	Missense_Mutation	ENSCAFT00000006363.5	exon9	c.G11768A	p.S3923N
27GAR	DLBCL	AGGRESSIVE	chr19	15240057	15240057	C	A	FAT4	SNP	exonic	Missense_Mutation	ENSCAFT00000006363.5	exon4	c.G5908T	p.D1970Y
27GAR	DLBCL	AGGRESSIVE	chr6	10222875	10222875	A	T	ARPC1A	SNP	exonic	Silent	ENSCAFT00000036371.4	exon4	c.T516A	p.I172I
27GAR	DLBCL	AGGRESSIVE	chr14	55598711	55598711	A	G	MET	SNP	UTR5	5'UTR	-	-	-	-
27GAR	DLBCL	AGGRESSIVE	chr14	55598821	55598821	T	C	MET	SNP	UTR5	5'UTR	-	-	-	-
27GAR	DLBCL	AGGRESSIVE	chr26	37844610	37844610	A	C	PTEN	SNP	intronic	Intron	-	-	-	-
27GAR	DLBCL	AGGRESSIVE	chr27	5537347	5537347	C	T	KMT2D	SNP	intronic	Intron	-	-	-	-
27GAR	DLBCL	AGGRESSIVE	chr5	32565070	32565070	C	T	TP53	SNP	splicing	Splice_Site	-	-	-	-
27SCI	DLBCL	AGGRESSIVE	chr8	70789190	70789190	C	CTGATT	TRAF3	NA	exonic	Nonsense_Mutation	ENSCAFT00000085506.1	exon8	c.1003delinsCTGATT	p.W337*
27SCI	DLBCL	AGGRESSIVE	chr9	18280468	18280468	C	T	MAP3K14	SNP	exonic	Missense_Mutation	ENSCAFT00000021854.4	exon1	c.C251T	p.A84V
27SCI	DLBCL	AGGRESSIVE	chr20	41710224	41710224	C	CCGTT	SETD2	NA	exonic	Frame_Shift_Ins	ENSCAFT00000021260.4	exon3	c.514delinsCCGTT	p.L173Ffs*61
28RUG	DLBCL	AGGRESSIVE	chr15	50194596	50194596	G	A	FBXW7	SNP	exonic	Missense_Mutation	ENSCAFT00000012962.5	exon8	c.C1534T	p.R512C
28RUG	DLBCL	AGGRESSIVE	chr34	40579595	40579595	A	C	TBL1XR1	SNP	exonic	Missense_Mutation	ENSCAFT00000024648.5	exon15	c.T1459G	p.F487V
28RUG	DLBCL	AGGRESSIVE	chrX	35769842	35769842	G	A	DDX3X	SNP	exonic	Missense_Mutation	ENSCAFT00000061818.1	exon8	c.G763A	p.D255N
28RUG	DLBCL	AGGRESSIVE	chr18	41635323	41635323	G	A	PTPRJ	SNP	upstream	5'Flank	-	-	-	-
28RUG	DLBCL	AGGRESSIVE	chr34	40656856	40656856	C	T	TBL1XR1	SNP	UTR5	5'UTR	-	-	-	-
28RUG	DLBCL	AGGRESSIVE	chr8	70789239	70789240	TG	T	TRAF3	NA	exonic	Frame_Shift_Del	ENSCAFT00000085506.1	exon8	c.1052_1053delinsT	p.K353Rfs*25
28RUG	DLBCL	AGGRESSIVE	chr8	70789612	70789612	C	CA	TRAF3	NA	exonic	Frame_Shift_Ins	ENSCAFT00000085506.1	exon8	c.1425delinsCA	p.I476Nfs*29
29PED	DLBCL	AGGRESSIVE	chr13	25203035	25203035	C	A	MYC	SNP	exonic	Missense_Mutation	ENSCAFT00000001656.4	exon2	c.C208A	p.P70T
29PED	DLBCL	AGGRESSIVE	chr15	50417188	50417188	C	T	FBXW7	SNP	exonic	Missense_Mutation	ENSCAFT00000082966.1	exon1	c.G8A	p.S3N
29PED	DLBCL	AGGRESSIVE	chr6	10226229	10226229	T	A	ARPC1A	SNP	exonic	Nonsense_Mutation	ENSCAFT00000036371.4	exon3	c.A364T	p.K122X
29PED	DLBCL	AGGRESSIVE	chr8	70788125	70788125	C	T	TRAF3	SNP	exonic	Nonsense_Mutation	ENSCAFT00000085506.1	exon7	c.C829T	p.R277X
29PED	DLBCL	AGGRESSIVE	chr27	22258077	22258077	A	G	KRAS	SNP	UTR5	5'UTR	-	-	-	-
29RSS	DLBCL	AGGRESSIVE	chr14	10988358	10988358	A	C	POT1	SNP	exonic	Missense_Mutation	ENSCAFT00000082826.1	exon1	c.A69C	p.K23N
29RSS	DLBCL	AGGRESSIVE	chr14	11043400	11043400	C	T	POT1	SNP	exonic	Missense_Mutation	ENSCAFT00000080986.1	exon6	c.C427T	p.R143W
29RSS	DLBCL	AGGRESSIVE	chr19	15195273	15195273	C	T	FAT4	SNP	exonic	Missense_Mutation	ENSCAFT00000006363.5	exon9	c.G11768A	p.S3923N
29RSS	DLBCL	AGGRESSIVE	chr20	41799516	41799516	A	T	SETD2	SNP	exonic	Missense_Mutation	ENSCAFT00000071377.1	exon19	c.A7376T	p.K2459I
29RSS	DLBCL	AGGRESSIVE	chr18	41628565	41628565	A	C	PTPRJ	SNP	exonic	Missense_Mutation	ENSCAFT00000013154.4	exon4	c.T590G	p.V197G
29RSS	DLBCL	AGGRESSIVE	chr3	21071221	21071221	G	GTAAC	RASA1	NA	UTR3	3'UTR	-	-	-	-
29RSS	DLBCL	AGGRESSIVE	chr20	41712455	41712457	GTT	G	SETD2	NA	exonic	Frame_Shift_Del	ENSCAFT00000021260.4	exon3	c.2745_2747delinsG	p.L917Kfs*12
30RCC	DLBCL	AGGRESSIVE	chr20	41714131	41714131	T	G	SETD2	SNP	exonic	Missense_Mutation	ENSCAFT00000021260.4	exon3	c.T4421G	p.I1474S
30RCC	DLBCL	AGGRESSIVE	chr20	41722197	41722197	C	T	SETD2	SNP	exonic	Missense_Mutation	ENSCAFT00000021260.4	exon7	c.C4867T	p.R1623C
30RCC	DLBCL	AGGRESSIVE	chr27	5535973	5535973	T	C	KMT2D	SNP	exonic	Silent	ENSCAFT00000045185.2	exon30	c.T7284C	p.A2428A
30RCC	DLBCL	AGGRESSIVE	chr8	70788125	70788125	C	T	TRAF3	SNP	exonic	Nonsense_Mutation	ENSCAFT00000085506.1	exon7	c.C829T	p.R277X
30RCC	DLBCL	AGGRESSIVE	chr2	53516426	53516426	T	A	PIK3R1	SNP	intronic	Intron	-	-	-	-
30RCC	DLBCL	AGGRESSIVE	chr26	10021969	10021969	G	A	PTPN11	SNP	intronic	Intron	-	-	-	-
31PST	DLBCL	AGGRESSIVE	chr13	25203042	25203042	C	G	MYC	SNP	exonic	Missense_Mutation	ENSCAFT00000001656.4	exon2	c.C215G	p.P72R
31PST	DLBCL	AGGRESSIVE	chr14	11051354	11051354	C	T	POT1	SNP	exonic	Nonsense_Mutation	ENSCAFT00000080986.1	exon9	c.C706T	p.R236X
31PST	DLBCL	AGGRESSIVE	chr14	55598711	55598711	A	G	MET	SNP	UTR5	5'UTR	-	-	-	-
31PST	DLBCL	AGGRESSIVE	chr18	41635323	41635323	G	A	PTPRJ	SNP	upstream	5'Flank	-	-	-	-
31PST	DLBCL	AGGRESSIVE	chr3	21083438	21083438	C	A	CCNH	SNP	intronic	Intron	-	-	-	-
31PST	DLBCL	AGGRESSIVE	chr8	70778595	70778595	C	CA	TRAF3	NA	exonic	Frame_Shift_Ins	ENSCAFT00000086511.1	exon7	c.702delinsCA	p.V235Sfs*9
31PST	DLBCL	AGGRESSIVE	chr8	70789622	70789630	ACTTCGGAT	A	TRAF3	NA	exonic	Frame_Shift_Del	ENSCAFT00000085506.1	exon8	c.1435_1443delinsA	p.S480Afs*22
32PIE	DLBCL	AGGRESSIVE	chr13	25203041	25203041	C	T	MYC	SNP	exonic	Missense_Mutation	ENSCAFT00000001656.4	exon2	c.C214T	p.P72S
32PIE	DLBCL	AGGRESSIVE	chr14	11053058	11053058	C	A	POT1	SNP	exonic	Nonsense_Mutation	ENSCAFT00000080986.1	exon10	c.C881A	p.S294X
32PIE	DLBCL	AGGRESSIVE	chrX	35770519	35770519	C	T	DDX3X	SNP	exonic	Missense_Mutation	ENSCAFT00000061818.1	exon9	c.C829T	p.R277W
33PDR	DLBCL	AGGRESSIVE	chr14	11014693	11014693	G	A	POT1	SNP	exonic	Missense_Mutation	ENSCAFT00000086242.1	exon3	c.G179A	p.G60E
33PDR	DLBCL	AGGRESSIVE	chr15	50416921	50416921	C	A	FBXW7	SNP	exonic	Missense_Mutation	ENSCAFT00000082966.1	exon1	c.G275T	p.G92V
33PDR	DLBCL	AGGRESSIVE	chr15	50417188	50417188	C	T	FBXW7	SNP	exonic	Missense_Mutation	ENSCAFT00000082966.1	exon1	c.G8A	p.S3N
33PDR	DLBCL	AGGRESSIVE	chr19	15330599	15330599	T	A	FAT4	SNP	exonic	Missense_Mutation	ENSCAFT00000006363.5	exon1	c.A1447T	p.N483Y
33PDR	DLBCL	AGGRESSIVE	chr8	70789205	70789205	C	T	TRAF3	SNP	exonic	Nonsense_Mutation	ENSCAFT00000085506.1	exon8	c.C1018T	p.R340X
33PDR	DLBCL	AGGRESSIVE	chr18	41635323	41635323	G	A	PTPRJ	SNP	upstream	5'Flank	-	-	-	-
33PDR	DLBCL	AGGRESSIVE	chr20	41719088	41719088	T	G	SETD2	SNP	intronic	Intron	-	-	-	-
35ORN	DLBCL	AGGRESSIVE	chr5	32563388	32563388	C	T	TP53	SNP	exonic	Missense_Mutation	ENSCAFT00000086831.1	exon5	c.G641A	p.R214Q
35ORN	DLBCL	AGGRESSIVE	chr8	70767863	70767863	A	C	TRAF3	SNP	exonic	Missense_Mutation	ENSCAFT00000028719.4	exon5	c.A411C	p.L137F
35ORN	DLBCL	AGGRESSIVE	chr14	55598711	55598711	A	G	MET	SNP	UTR5	5'UTR	-	-	-	-
36MCL	DLBCL	AGGRESSIVE	chr2	53522023	53522023	G	A	PIK3R1	SNP	exonic	Missense_Mutation	ENSCAFT00000061673.1	exon7	c.G868A	p.D290N
36MCL	DLBCL	AGGRESSIVE	chr34	40579601	40579601	C	T	TBL1XR1	SNP	exonic	Missense_Mutation	ENSCAFT00000024648.5	exon15	c.G1453A	p.G485R
36MCL	DLBCL	AGGRESSIVE	chr5	32563710	32563710	C	T	TP53	SNP	exonic	Missense_Mutation	ENSCAFT00000086831.1	exon4	c.G541A	p.V181M
36MCL	DLBCL	AGGRESSIVE	chr8	70789205	70789205	C	T	TRAF3	SNP	exonic	Nonsense_Mutation	ENSCAFT00000085506.1	exon8	c.C1018T	p.R340X
36MCL	DLBCL	AGGRESSIVE	chrX	35766057	35766057	C	CT	DDX3X	NA	intronic	Intron	-	-	-	-
37MNZ	DLBCL	AGGRESSIVE	chr15	50194596	50194596	G	A	FBXW7	SNP	exonic	Missense_Mutation	ENSCAFT00000012962.5	exon8	c.C1534T	p.R512C
37MNZ	DLBCL	AGGRESSIVE	chr6	10226256	10226256	C	A	ARPC1A	SNP	exonic	Missense_Mutation	ENSCAFT00000036371.4	exon3	c.G337T	p.V113F
37MNZ	DLBCL	AGGRESSIVE	chrX	35769842	35769842	G	A	DDX3X	SNP	exonic	Missense_Mutation	ENSCAFT00000061818.1	exon8	c.G763A	p.D255N
37MNZ	DLBCL	AGGRESSIVE	chr14	55598711	55598711	A	G	MET	SNP	UTR5	5'UTR	-	-	-	-
37MNZ	DLBCL	AGGRESSIVE	chr8	70783056	70783056	G	C	TRAF3	SNP	splicing	Splice_Site	-	-	-	-
38MSN	DLBCL	AGGRESSIVE	chr20	41717787	41717787	T	G	SETD2	SNP	exonic	Missense_Mutation	ENSCAFT00000021260.4	exon4	c.T4579G	p.C1527G
38MSN	DLBCL	AGGRESSIVE	chr14	55598711	55598711	A	G	MET	SNP	UTR5	5'UTR	-	-	-	-
38MSN	DLBCL	AGGRESSIVE	chr20	41717642	41717642	A	G	SETD2	SNP	intronic	Intron	-	-	-	-
38MSN	DLBCL	AGGRESSIVE	chr27	22258077	22258077	A	G	KRAS	SNP	UTR5	5'UTR	-	-	-	-
3GIA	DLBCL	AGGRESSIVE	chr5	32563073	32563073	C	T	TP53	SNP	exonic	Missense_Mutation	ENSCAFT00000086831.1	exon6	c.G695A	p.R232H
3GIA	DLBCL	AGGRESSIVE	chr9	18280462	18280462	C	T	MAP3K14	SNP	exonic	Missense_Mutation	ENSCAFT00000021854.4	exon1	c.C245T	p.A82V
3GIA	DLBCL	AGGRESSIVE	chr14	55598711	55598711	A	G	MET	SNP	UTR5	5'UTR	-	-	-	-
3GIA	DLBCL	AGGRESSIVE	chr27	22258077	22258077	A	G	KRAS	SNP	UTR5	5'UTR	-	-	-	-
3GIA	DLBCL	AGGRESSIVE	chr3	21071221	21071221	G	GTAAC	RASA1	NA	UTR3	3'UTR	-	-	-	-
3GIA	DLBCL	AGGRESSIVE	chr3	21081177	21081177	C	A	CCNH	SNP	intronic	Intron	-	-	-	-
3GIA	DLBCL	AGGRESSIVE	chr8	70764084	70764084	A	T	TRAF3	SNP	intronic	Intron	-	-	-	-
3GIA	DLBCL	AGGRESSIVE	chr9	18301710	18301710	C	T	MAP3K14	SNP	UTR3	3'UTR	-	-	-	-
3GIA	DLBCL	AGGRESSIVE	chr8	70789440	70789440	A	AG	TRAF3	NA	exonic	Frame_Shift_Ins	ENSCAFT00000085506.1	exon8	c.1253delinsAG	p.S420Vfs*48
40MNO	DLBCL	AGGRESSIVE	chr13	25203310	25203310	G	C	MYC	SNP	exonic	Missense_Mutation	ENSCAFT00000001656.4	exon2	c.G483C	p.K161N
40MNO	DLBCL	AGGRESSIVE	chr6	10226229	10226229	T	A	ARPC1A	SNP	exonic	Nonsense_Mutation	ENSCAFT00000036371.4	exon3	c.A364T	p.K122X
40MNO	DLBCL	AGGRESSIVE	chr9	18280456	18280456	T	A	MAP3K14	SNP	exonic	Missense_Mutation	ENSCAFT00000021854.4	exon1	c.T239A	p.I80N
41MLT	DLBCL	AGGRESSIVE	chr2	53523695	53523695	G	A	PIK3R1	SNP	exonic	Missense_Mutation	ENSCAFT00000061673.1	exon10	c.G1312A	p.D438N
41MLT	DLBCL	AGGRESSIVE	chr27	5523179	5523179	T	A	KMT2D	SNP	exonic	Missense_Mutation	ENSCAFT00000013872.6	exon5	c.T629A	p.L210Q
41MLT	DLBCL	AGGRESSIVE	chr5	32563967	32563967	C	T	TP53	SNP	exonic	Missense_Mutation	ENSCAFT00000086831.1	exon3	c.G365A	p.R122H
41MLT	DLBCL	AGGRESSIVE	chr9	18280456	18280456	T	C	MAP3K14	SNP	exonic	Missense_Mutation	ENSCAFT00000021854.4	exon1	c.T239C	p.I80T
41MLT	DLBCL	AGGRESSIVE	chrX	35769806	35769806	T	C	DDX3X	SNP	exonic	Missense_Mutation	ENSCAFT00000061818.1	exon8	c.T727C	p.C243R
41MLT	DLBCL	AGGRESSIVE	chr2	53456500	53456500	A	C	PIK3R1	SNP	UTR5	5'UTR	-	-	-	-
41MLT	DLBCL	AGGRESSIVE	chr19	15159612	15159615	TCTC	T	FAT4	NA	exonic	In_Frame_Del	ENSCAFT00000059626.1	exon16	c.14151_14154delinsA	p.R4718del
42TAD	DLBCL	AGGRESSIVE	chr15	50192584	50192584	C	G	FBXW7	SNP	exonic	Missense_Mutation	ENSCAFT00000012962.5	exon9	c.G1577C	p.R526P
42TAD	DLBCL	AGGRESSIVE	chrX	35768029	35768029	G	A	DDX3X	SNP	exonic	Missense_Mutation	ENSCAFT00000022643.5	exon6	c.G620A	p.C207Y
42TAD	DLBCL	AGGRESSIVE	chrX	35769843	35769843	A	G	DDX3X	SNP	exonic	Missense_Mutation	ENSCAFT00000061818.1	exon8	c.A764G	p.D255G
42TAD	DLBCL	AGGRESSIVE	chr8	70788098	70788098	A	AAG	TRAF3	NA	exonic	Frame_Shift_Ins	ENSCAFT00000085506.1	exon7	c.802delinsAAG	p.S269Rfs*11
43MST	DLBCL	AGGRESSIVE	chr13	25203039	25203039	C	T	MYC	SNP	exonic	Missense_Mutation	ENSCAFT00000001656.4	exon2	c.C212T	p.T71I
43MST	DLBCL	AGGRESSIVE	chr14	11044555	11044555	C	T	POT1	SNP	exonic	Nonsense_Mutation	ENSCAFT00000080986.1	exon7	c.C511T	p.Q171X
43MST	DLBCL	AGGRESSIVE	chrX	35770528	35770528	G	T	DDX3X	SNP	exonic	Missense_Mutation	ENSCAFT00000061818.1	exon9	c.G838T	p.D280Y
43MST	DLBCL	AGGRESSIVE	chrX	35770735	35770735	T	A	DDX3X	SNP	exonic	Missense_Mutation	ENSCAFT00000061818.1	exon10	c.T964A	p.F322I
43MST	DLBCL	AGGRESSIVE	chr27	22258077	22258077	A	G	KRAS	SNP	UTR5	5'UTR	-	-	-	-
43MST	DLBCL	AGGRESSIVE	chrX	35766057	35766057	C	CT	DDX3X	NA	intronic	Intron	-	-	-	-
43MST	DLBCL	AGGRESSIVE	chrX	35770669	35770669	T	C	DDX3X	SNP	intronic	Intron	-	-	-	-
43MST	DLBCL	AGGRESSIVE	chr8	70789301	70789309	TGTGCCAGG	T	TRAF3	NA	exonic	Frame_Shift_Del	ENSCAFT00000085506.1	exon8	c.1114_1122delinsT	p.A373Lfs*25
44LCL	DLBCL	AGGRESSIVE	chr15	50194596	50194596	G	A	FBXW7	SNP	exonic	Missense_Mutation	ENSCAFT00000012962.5	exon8	c.C1534T	p.R512C
44LCL	DLBCL	AGGRESSIVE	chr5	32563416	32563416	T	G	TP53	SNP	exonic	Missense_Mutation	ENSCAFT00000086831.1	exon5	c.A613C	p.S205R
44LCL	DLBCL	AGGRESSIVE	chrX	35766057	35766057	C	CT	DDX3X	NA	intronic	Intron	-	-	-	-
44LCL	DLBCL	AGGRESSIVE	chr15	50282126	50282137	CTCCTCCTCTTG	C	FBXW7	NA	exonic	Frame_Shift_Del	ENSCAFT00000012962.5	exon1	c.283_294delinsG	p.Q95Afs*7
44LCL	DLBCL	AGGRESSIVE	chr20	41710885	41710885	C	CAG	SETD2	NA	exonic	Frame_Shift_Ins	ENSCAFT00000021260.4	exon3	c.1175delinsCAG	p.R396Sfs*85
45LUC	DLBCL	AGGRESSIVE	chr15	50194595	50194595	C	T	FBXW7	SNP	exonic	Missense_Mutation	ENSCAFT00000012962.5	exon8	c.G1535A	p.R512H
45LUC	DLBCL	AGGRESSIVE	chr20	41710875	41710875	C	T	SETD2	SNP	exonic	Nonsense_Mutation	ENSCAFT00000021260.4	exon3	c.C1165T	p.R389X
45LUC	DLBCL	AGGRESSIVE	chr26	37900579	37900579	C	T	PTEN	SNP	exonic	Missense_Mutation	ENSCAFT00000024821.4	exon5	c.C421T	p.R141C
45LUC	DLBCL	AGGRESSIVE	chr27	5543213	5543213	G	A	KMT2D	SNP	exonic	Missense_Mutation	ENSCAFT00000045185.2	exon38	c.G12247A	p.A4083T
45LUC	DLBCL	AGGRESSIVE	chr20	41776383	41776383	T	C	SETD2	SNP	intronic	Intron	-	-	-	-
45LUC	DLBCL	AGGRESSIVE	chrX	35766057	35766057	C	CT	DDX3X	NA	intronic	Intron	-	-	-	-
45LUC	DLBCL	AGGRESSIVE	chr15	50189423	50189424	TC	T	FBXW7	NA	exonic	Frame_Shift_Del	ENSCAFT00000012962.5	exon11	c.2142_2143delinsA	p.S715Vfs*39
45LUC	DLBCL	AGGRESSIVE	chr5	32563712	32563714	CTG	C	TP53	NA	exonic	Frame_Shift_Del	ENSCAFT00000086831.1	exon4	c.537_539delinsG	p.H179Qfs*7
47LOC	DLBCL	AGGRESSIVE	chr13	25203042	25203042	C	T	MYC	SNP	exonic	Missense_Mutation	ENSCAFT00000001656.4	exon2	c.C215T	p.P72L
47LOC	DLBCL	AGGRESSIVE	chr16	8317530	8317530	C	T	BRAF	SNP	UTR3	3'UTR	-	-	-	-
47LOC	DLBCL	AGGRESSIVE	chr18	41610435	41610435	T	TA	PTPRJ	NA	exonic	Frame_Shift_Ins	ENSCAFT00000013154.4	exon10	c.2222delinsTA	p.Y741Lfs*23
48LKH	DLBCL	AGGRESSIVE	chr14	11030289	11030289	C	T	POT1	SNP	exonic	Missense_Mutation	ENSCAFT00000086242.1	exon4	c.C269T	p.P90L
48LKH	DLBCL	AGGRESSIVE	chr14	55627044	55627044	C	T	MET	SNP	exonic	Silent	ENSCAFT00000005469.3	exon2	c.C708T	p.F236F
48LKH	DLBCL	AGGRESSIVE	chr15	50199914	50199914	C	T	FBXW7	SNP	exonic	Silent	ENSCAFT00000012962.5	exon5	c.G1125A	p.E375E
48LKH	DLBCL	AGGRESSIVE	chr15	50416599	50416599	C	A	FBXW7	SNP	exonic	Silent	ENSCAFT00000082966.1	exon1	c.G597T	p.R199R
48LKH	DLBCL	AGGRESSIVE	chr6	10226229	10226229	T	A	ARPC1A	SNP	exonic	Nonsense_Mutation	ENSCAFT00000036371.4	exon3	c.A364T	p.K122X
48LKH	DLBCL	AGGRESSIVE	chrX	35770538	35770538	T	A	DDX3X	SNP	exonic	Missense_Mutation	ENSCAFT00000061818.1	exon9	c.T848A	p.F283Y
48LKH	DLBCL	AGGRESSIVE	chr3	21085282	21085282	C	T	CCNH	SNP	intronic	Intron	-	-	-	-
48LKH	DLBCL	AGGRESSIVE	chr13	25203030	25203045	TGCTGCCCACCCCGCC	T	MYC	NA	exonic	In_Frame_Del	ENSCAFT00000001656.4	exon2	c.203_218delinsT	p.P70_L74del
49LOS	DLBCL	AGGRESSIVE	chr20	41717764	41717764	T	C	SETD2	SNP	exonic	Missense_Mutation	ENSCAFT00000021260.4	exon4	c.T4556C	p.L1519P
49LOS	DLBCL	AGGRESSIVE	chr20	41720997	41720997	A	T	SETD2	SNP	exonic	Nonsense_Mutation	ENSCAFT00000021260.4	exon6	c.A4762T	p.K1588X
49LOS	DLBCL	AGGRESSIVE	chr27	5538146	5538146	G	A	KMT2D	SNP	exonic	Missense_Mutation	ENSCAFT00000045185.2	exon33	c.G9044A	p.R3015H
49LOS	DLBCL	AGGRESSIVE	chrX	35766057	35766057	C	CT	DDX3X	NA	intronic	Intron	-	-	-	-
50LGG	DLBCL	AGGRESSIVE	chr27	5543213	5543213	G	A	KMT2D	SNP	exonic	Missense_Mutation	ENSCAFT00000045185.2	exon38	c.G12247A	p.A4083T
50LGG	DLBCL	AGGRESSIVE	chr8	70788125	70788125	C	T	TRAF3	SNP	exonic	Nonsense_Mutation	ENSCAFT00000085506.1	exon7	c.C829T	p.R277X
50LGG	DLBCL	AGGRESSIVE	chrX	35770540	35770540	G	A	DDX3X	SNP	exonic	Missense_Mutation	ENSCAFT00000061818.1	exon9	c.G850A	p.E284K
50LGG	DLBCL	AGGRESSIVE	chr8	70787979	70787979	T	G	TRAF3	SNP	intronic	Intron	-	-	-	-
50LGG	DLBCL	AGGRESSIVE	chr9	22759958	22759958	G	GT	ERBB2	NA	UTR3	3'UTR	-	-	-	-
51LNT	DLBCL	AGGRESSIVE	chr13	25203040	25203040	C	T	MYC	SNP	exonic	Silent	ENSCAFT00000001656.4	exon2	c.C213T	p.T71T
51LNT	DLBCL	AGGRESSIVE	chr13	25204763	25204763	C	A	MYC	SNP	exonic	Missense_Mutation	ENSCAFT00000001656.4	exon3	c.C813A	p.D271E
51LNT	DLBCL	AGGRESSIVE	chr14	11066334	11066334	C	T	POT1	SNP	exonic	Missense_Mutation	ENSCAFT00000080986.1	exon15	c.C1445T	p.S482L
51LNT	DLBCL	AGGRESSIVE	chr19	15329673	15329673	G	A	FAT4	SNP	exonic	Silent	ENSCAFT00000006363.5	exon1	c.C2373T	p.P791P
51LNT	DLBCL	AGGRESSIVE	chr27	5536514	5536514	C	G	KMT2D	SNP	exonic	Missense_Mutation	ENSCAFT00000045185.2	exon30	c.C7825G	p.P2609A
51LNT	DLBCL	AGGRESSIVE	chr9	18280416	18280416	G	A	MAP3K14	SNP	exonic	Missense_Mutation	ENSCAFT00000021854.4	exon1	c.G199A	p.A67T
51LNT	DLBCL	AGGRESSIVE	chrX	35771445	35771445	T	A	DDX3X	SNP	exonic	Missense_Mutation	ENSCAFT00000061818.1	exon12	c.T1382A	p.V461E
51LNT	DLBCL	AGGRESSIVE	chr3	21071221	21071221	G	GTAAC	RASA1	NA	UTR3	3'UTR	-	-	-	-
51LNT	DLBCL	AGGRESSIVE	chr3	21176740	21176740	A	G	RASA1	SNP	UTR5	5'UTR	-	-	-	-
51LNT	DLBCL	AGGRESSIVE	chr34	40578476	40578476	A	G	TBL1XR1	SNP	downstream	3'Flank	-	-	-	-
52LNI	DLBCL	AGGRESSIVE	chr14	11061777	11061777	T	C	POT1	SNP	exonic	Missense_Mutation	ENSCAFT00000080986.1	exon13	c.T1232C	p.L411P
52LNI	DLBCL	AGGRESSIVE	chr15	50192580	50192580	A	T	FBXW7	SNP	exonic	Missense_Mutation	ENSCAFT00000012962.5	exon9	c.T1581A	p.D527E
52LNI	DLBCL	AGGRESSIVE	chr20	41717703	41717703	T	C	SETD2	SNP	exonic	Missense_Mutation	ENSCAFT00000021260.4	exon4	c.T4495C	p.C1499R
52LNI	DLBCL	AGGRESSIVE	chr8	70762027	70762027	G	A	TRAF3	SNP	exonic	Missense_Mutation	ENSCAFT00000028719.4	exon2	c.G227A	p.C76Y
52LNI	DLBCL	AGGRESSIVE	chr8	70789205	70789205	C	T	TRAF3	SNP	exonic	Nonsense_Mutation	ENSCAFT00000085506.1	exon8	c.C1018T	p.R340X
52LNI	DLBCL	AGGRESSIVE	chrX	35770538	35770538	T	G	DDX3X	SNP	exonic	Missense_Mutation	ENSCAFT00000061818.1	exon9	c.T848G	p.F283C
52LNI	DLBCL	AGGRESSIVE	chr9	22759958	22759958	G	GT	ERBB2	NA	UTR3	3'UTR	-	-	-	-
53IOR	DLBCL	AGGRESSIVE	chr27	5525667	5525667	A	G	KMT2D	SNP	exonic	Silent	ENSCAFT00000013872.6	exon10	c.A2250G	p.P750P
53IOR	DLBCL	AGGRESSIVE	chr27	5534658	5534658	T	A	KMT2D	SNP	exonic	Missense_Mutation	ENSCAFT00000045185.2	exon27	c.T6397A	p.F2133I
53IOR	DLBCL	AGGRESSIVE	chrX	35766057	35766057	C	CT	DDX3X	NA	intronic	Intron	-	-	-	-
53IOR	DLBCL	AGGRESSIVE	chr5	32563753	32563755	CAA	C	TP53	NA	exonic	Frame_Shift_Del	ENSCAFT00000086831.1	exon4	c.496_498delinsG	p.L166Afs*20
53IOR	DLBCL	AGGRESSIVE	chr8	70789220	70789220	C	CG	TRAF3	NA	exonic	Frame_Shift_Ins	ENSCAFT00000085506.1	exon8	c.1033delinsCG	p.K346Efs*25
54GBB	DLBCL	AGGRESSIVE	chr34	40582833	40582833	T	C	TBL1XR1	SNP	exonic	Missense_Mutation	ENSCAFT00000024648.5	exon14	c.A1322G	p.H441R
54GBB	DLBCL	AGGRESSIVE	chr8	70782927	70782927	C	T	TRAF3	SNP	exonic	Nonsense_Mutation	ENSCAFT00000085506.1	exon6	c.C583T	p.Q195X
54GBB	DLBCL	AGGRESSIVE	chrX	35769774	35769774	T	G	DDX3X	SNP	exonic	Missense_Mutation	ENSCAFT00000061818.1	exon8	c.T695G	p.I232R
54GBB	DLBCL	AGGRESSIVE	chr26	10041589	10041589	A	G	PTPN11	SNP	intronic	Intron	-	-	-	-
55GVN	DLBCL	AGGRESSIVE	chr13	25203050	25203050	T	C	MYC	SNP	exonic	Missense_Mutation	ENSCAFT00000001656.4	exon2	c.T223C	p.S75P
55GVN	DLBCL	AGGRESSIVE	chr27	5536514	5536514	C	G	KMT2D	SNP	exonic	Missense_Mutation	ENSCAFT00000045185.2	exon30	c.C7825G	p.P2609A
55GVN	DLBCL	AGGRESSIVE	chr34	40579601	40579601	C	T	TBL1XR1	SNP	exonic	Missense_Mutation	ENSCAFT00000024648.5	exon15	c.G1453A	p.G485R
55GVN	DLBCL	AGGRESSIVE	chr16	8317530	8317530	C	T	BRAF	SNP	UTR3	3'UTR	-	-	-	-
55GVN	DLBCL	AGGRESSIVE	chr27	22258077	22258077	A	G	KRAS	SNP	UTR5	5'UTR	-	-	-	-
55GVN	DLBCL	AGGRESSIVE	chr8	70788156	70788156	G	GTGCA	TRAF3	NA	exonic	Frame_Shift_Ins	ENSCAFT00000085506.1	exon7	c.860delinsGTGCA	p.G289Cfs*26
58GLN	DLBCL	AGGRESSIVE	chr5	32563017	32563017	C	T	TP53	SNP	exonic	Missense_Mutation	ENSCAFT00000086831.1	exon6	c.G751A	p.E251K
58GLN	DLBCL	AGGRESSIVE	chr9	18280456	18280456	T	C	MAP3K14	SNP	exonic	Missense_Mutation	ENSCAFT00000021854.4	exon1	c.T239C	p.I80T
58GLN	DLBCL	AGGRESSIVE	chr14	55598711	55598711	A	G	MET	SNP	UTR5	5'UTR	-	-	-	-
58GLN	DLBCL	AGGRESSIVE	chr13	47183155	47183155	T	A	KIT	SNP	intronic	Intron	-	-	-	-
59GBL	DLBCL	AGGRESSIVE	chr13	25203044	25203044	C	T	MYC	SNP	exonic	Missense_Mutation	ENSCAFT00000001656.4	exon2	c.C217T	p.P73S
59GBL	DLBCL	AGGRESSIVE	chr8	70789479	70789479	C	T	TRAF3	SNP	exonic	Missense_Mutation	ENSCAFT00000085506.1	exon8	c.C1292T	p.P431L
59GBL	DLBCL	AGGRESSIVE	chr14	11037779	11037779	G	A	POT1	SNP	exonic	Missense_Mutation	ENSCAFT00000080986.1	exon5	c.G160A	p.D54N
59GBL	DLBCL	AGGRESSIVE	chr13	47452779	47452779	C	T	KDR	SNP	intronic	Intron	-	-	-	-
59GBL	DLBCL	AGGRESSIVE	chr19	15174089	15174089	G	T	FAT4	SNP	intronic	Intron	-	-	-	-
59GBL	DLBCL	AGGRESSIVE	chr27	5535253	5535253	G	T	KMT2D	SNP	intronic	Intron	-	-	-	-
59GBL	DLBCL	AGGRESSIVE	chr34	40656856	40656856	C	T	TBL1XR1	SNP	UTR5	5'UTR	-	-	-	-
59GBL	DLBCL	AGGRESSIVE	chrX	35766057	35766057	C	CT	DDX3X	NA	intronic	Intron	-	-	-	-
59GBL	DLBCL	AGGRESSIVE	chr20	41723904	41723904	G	GT	SETD2	NA	exonic	Frame_Shift_Ins	ENSCAFT00000021260.4	exon8	c.4941delinsGT	p.T1650Yfs*14
59GBL	DLBCL	AGGRESSIVE	chr8	70789598	70789599	AT	A	TRAF3	NA	exonic	Frame_Shift_Del	ENSCAFT00000085506.1	exon8	c.1411_1412delinsA	p.F472Lfs*5
5MAN	DLBCL	AGGRESSIVE	chr13	25203039	25203039	C	A	MYC	SNP	exonic	Missense_Mutation	ENSCAFT00000001656.4	exon2	c.C212A	p.T71N
5MAN	DLBCL	AGGRESSIVE	chr16	8296284	8296284	T	A	BRAF	SNP	exonic	Missense_Mutation	ENSCAFT00000092688.1	exon14	c.T1643A	p.V548E
5MAN	DLBCL	AGGRESSIVE	chr20	41712282	41712283	TC	T	SETD2	NA	exonic	Nonsense_Mutation	ENSCAFT00000021260.4	exon3	c.2572_2573delinsT	p.S858*
5MAN	DLBCL	AGGRESSIVE	chr20	41737976	41737976	C	A	SETD2	SNP	exonic	Missense_Mutation	ENSCAFT00000021260.4	exon12	c.C5455A	p.L1819I
5MAN	DLBCL	AGGRESSIVE	chr20	41737977	41737977	T	A	SETD2	SNP	exonic	Missense_Mutation	ENSCAFT00000021260.4	exon12	c.T5456A	p.L1819H
5MAN	DLBCL	AGGRESSIVE	chr34	40738884	40738884	A	G	TBL1XR1	SNP	UTR5	5'UTR	-	-	-	-
5MAN	DLBCL	AGGRESSIVE	chr9	22759958	22759958	G	GT	ERBB2	NA	UTR3	3'UTR	-	-	-	-
5MAN	DLBCL	AGGRESSIVE	chrX	35766057	35766057	C	CT	DDX3X	NA	intronic	Intron	-	-	-	-
60FRS	DLBCL	AGGRESSIVE	chr14	11043382	11043382	G	T	POT1	SNP	exonic	Missense_Mutation	ENSCAFT00000080986.1	exon6	c.G409T	p.G137W
60FRS	DLBCL	AGGRESSIVE	chr15	50282032	50282032	G	A	FBXW7	SNP	exonic	Nonsense_Mutation	ENSCAFT00000012962.5	exon1	c.C388T	p.R130X
60FRS	DLBCL	AGGRESSIVE	chr8	70789205	70789205	C	T	TRAF3	SNP	exonic	Nonsense_Mutation	ENSCAFT00000085506.1	exon8	c.C1018T	p.R340X
60FRS	DLBCL	AGGRESSIVE	chr14	55723527	55723527	T	C	MET	SNP	UTR3	3'UTR	-	-	-	-
60FRS	DLBCL	AGGRESSIVE	chr26	37836647	37836647	G	T	PTEN	SNP	intronic	Intron	-	-	-	-
60FRS	DLBCL	AGGRESSIVE	chr3	21068787	21068787	T	C	RASA1	SNP	UTR3	3'UTR	-	-	-	-
60FRS	DLBCL	AGGRESSIVE	chr8	70789538	70789538	T	TGCCCAGTGA	TRAF3	NA	exonic	In_Frame_Ins	ENSCAFT00000085506.1	exon8	c.1351delinsTGCCCAGTGA	p.V453_F454insSPV
60MAG	DLBCL	AGGRESSIVE	chr16	8273943	8273943	A	G	BRAF	SNP	exonic	Silent	ENSCAFT00000092688.1	exon9	c.A1023G	p.G341G
60MAG	DLBCL	AGGRESSIVE	chrX	35769842	35769842	G	A	DDX3X	SNP	exonic	Missense_Mutation	ENSCAFT00000061818.1	exon8	c.G763A	p.D255N
60MAG	DLBCL	AGGRESSIVE	chr14	55598821	55598821	T	C	MET	SNP	UTR5	5'UTR	-	-	-	-
60MAG	DLBCL	AGGRESSIVE	chr18	41635323	41635323	G	A	PTPRJ	SNP	upstream	5'Flank	-	-	-	-
60MAG	DLBCL	AGGRESSIVE	chr2	53516425	53516425	A	T	PIK3R1	SNP	intronic	Intron	-	-	-	-
60MAG	DLBCL	AGGRESSIVE	chr34	40656802	40656802	G	A	TBL1XR1	SNP	intronic	Intron	-	-	-	-
60MAG	DLBCL	AGGRESSIVE	chr34	40739301	40739301	G	A	TBL1XR1	SNP	UTR5	5'UTR	-	-	-	-
60MAG	DLBCL	AGGRESSIVE	chr5	32563808	32563808	C	G	TP53	SNP	intronic	Intron	-	-	-	-
60MAG	DLBCL	AGGRESSIVE	chr6	10214147	10214147	A	T	ARPC1A	SNP	UTR3	3'UTR	-	-	-	-
60MAG	DLBCL	AGGRESSIVE	chr8	70767859	70767859	A	AT	TRAF3	NA	exonic	Frame_Shift_Ins	ENSCAFT00000028719.4	exon5	c.407delinsAT	p.L137Ffs*8
61FML	DLBCL	AGGRESSIVE	chr13	25203041	25203041	C	A	MYC	SNP	exonic	Missense_Mutation	ENSCAFT00000001656.4	exon2	c.C214A	p.P72T
61FML	DLBCL	AGGRESSIVE	chr13	25205065	25205065	A	G	MYC	SNP	exonic	Missense_Mutation	ENSCAFT00000001656.4	exon3	c.A1115G	p.H372R
61FML	DLBCL	AGGRESSIVE	chr19	15327392	15327392	C	A	FAT4	SNP	exonic	Missense_Mutation	ENSCAFT00000006363.5	exon1	c.G4654T	p.A1552S
61FML	DLBCL	AGGRESSIVE	chr9	22759958	22759958	G	GT	ERBB2	NA	UTR3	3'UTR	-	-	-	-
62FNT	DLBCL	AGGRESSIVE	chr13	47147736	47147736	G	A	KIT	SNP	exonic	Silent	ENSCAFT00000003274.4	exon3	c.G579A	p.K193K
62FNT	DLBCL	AGGRESSIVE	chr27	5548568	5548568	C	T	KMT2D	SNP	exonic	Missense_Mutation	ENSCAFT00000045185.2	exon47	c.C15425T	p.P5142L
62FNT	DLBCL	AGGRESSIVE	chr8	70788125	70788125	C	T	TRAF3	SNP	exonic	Nonsense_Mutation	ENSCAFT00000085506.1	exon7	c.C829T	p.R277X
62FNT	DLBCL	AGGRESSIVE	chrX	35769595	35769595	T	G	DDX3X	SNP	exonic	Missense_Mutation	ENSCAFT00000061818.1	exon7	c.T623G	p.I208S
62FNT	DLBCL	AGGRESSIVE	chrX	35770530	35770530	T	A	DDX3X	SNP	exonic	Missense_Mutation	ENSCAFT00000061818.1	exon9	c.T840A	p.D280E
62FNT	DLBCL	AGGRESSIVE	chr2	53516688	53516688	T	C	PIK3R1	SNP	exonic	Silent	ENSCAFT00000068054.1	exon1	c.T199C	p.L67L
62FNT	DLBCL	AGGRESSIVE	chr13	47108522	47108522	A	G	KIT	SNP	UTR5	5'UTR	-	-	-	-
62FNT	DLBCL	AGGRESSIVE	chr23	24622522	24622522	G	A	SATB1	SNP	intronic	Intron	-	-	-	-
63VNG	DLBCL	AGGRESSIVE	chr15	50190781	50190781	G	A	FBXW7	SNP	exonic	Missense_Mutation	ENSCAFT00000012962.5	exon10	c.C1886T	p.S629L
63VNG	DLBCL	AGGRESSIVE	chr15	50194714	50194714	C	G	FBXW7	SNP	exonic	Missense_Mutation	ENSCAFT00000012962.5	exon8	c.G1416C	p.W472C
63VNG	DLBCL	AGGRESSIVE	chr15	50416599	50416599	C	A	FBXW7	SNP	exonic	Silent	ENSCAFT00000082966.1	exon1	c.G597T	p.R199R
63VNG	DLBCL	AGGRESSIVE	chr18	41628565	41628565	A	C	PTPRJ	SNP	exonic	Missense_Mutation	ENSCAFT00000013154.4	exon4	c.T590G	p.V197G
63VNG	DLBCL	AGGRESSIVE	chr27	5538796	5538796	A	G	KMT2D	SNP	exonic	Missense_Mutation	ENSCAFT00000045185.2	exon33	c.A9694G	p.T3232A
63VNG	DLBCL	AGGRESSIVE	chr27	5539091	5539091	G	C	KMT2D	SNP	exonic	Missense_Mutation	ENSCAFT00000045185.2	exon33	c.G9989C	p.S3330T
63VNG	DLBCL	AGGRESSIVE	chr27	5547240	5547240	C	T	KMT2D	SNP	exonic	Missense_Mutation	ENSCAFT00000045185.2	exon44	c.C14975T	p.T4992M
63VNG	DLBCL	AGGRESSIVE	chr8	70767969	70767969	C	T	TRAF3	SNP	exonic	Nonsense_Mutation	ENSCAFT00000028719.4	exon5	c.C517T	p.R173X
63VNG	DLBCL	AGGRESSIVE	chr34	12670561	12670561	G	C	PIK3CA	SNP	intronic	Intron	-	-	-	-
63VNG	DLBCL	AGGRESSIVE	chr8	70790001	70790005	AACAC	A	TRAF3	NA	UTR3	3'UTR	-	-	-	-
63VNG	DLBCL	AGGRESSIVE	chrX	35766057	35766057	C	CT	DDX3X	NA	intronic	Intron	-	-	-	-
63VNG	DLBCL	AGGRESSIVE	chr20	41797594	41797594	C	CA	SETD2	NA	exonic	Frame_Shift_Ins	ENSCAFT00000071377.1	exon18	c.7214delinsCA	p.P2408Afs*2
64DRG	DLBCL	AGGRESSIVE	chr13	25203041	25203041	C	G	MYC	SNP	exonic	Missense_Mutation	ENSCAFT00000001656.4	exon2	c.C214G	p.P72A
64DRG	DLBCL	AGGRESSIVE	chrX	35769842	35769842	G	A	DDX3X	SNP	exonic	Missense_Mutation	ENSCAFT00000061818.1	exon8	c.G763A	p.D255N
65DIM	DLBCL	AGGRESSIVE	chr5	32563920	32563920	G	A	TP53	SNP	exonic	Missense_Mutation	ENSCAFT00000086831.1	exon3	c.C412T	p.R138W
65DIM	DLBCL	AGGRESSIVE	chr6	10213590	10213590	C	T	ARPC1A	SNP	UTR3	3'UTR	-	-	-	-
65DIM	DLBCL	AGGRESSIVE	chr6	10214147	10214147	A	T	ARPC1A	SNP	UTR3	3'UTR	-	-	-	-
65DIM	DLBCL	AGGRESSIVE	chr8	70774053	70774054	TC	T	TRAF3	NA	exonic	Frame_Shift_Del	ENSCAFT00000028719.4	exon6	c.591_592delinsT	p.C199Vfs*16
66DVE	DLBCL	AGGRESSIVE	chr34	40594371	40594371	G	A	TBL1XR1	SNP	exonic	Missense_Mutation	ENSCAFT00000024648.5	exon10	c.C919T	p.H307Y
66DVE	DLBCL	AGGRESSIVE	chr34	40594377	40594377	G	A	TBL1XR1	SNP	exonic	Missense_Mutation	ENSCAFT00000024648.5	exon10	c.C913T	p.P305S
66DVE	DLBCL	AGGRESSIVE	chr5	32563056	32563056	G	A	TP53	SNP	exonic	Missense_Mutation	ENSCAFT00000086831.1	exon6	c.C712T	p.R238C
66DVE	DLBCL	AGGRESSIVE	chr20	41800403	41800403	A	G	SETD2	SNP	intronic	Intron	-	-	-	-
66DVE	DLBCL	AGGRESSIVE	chrX	35766057	35766057	C	CT	DDX3X	NA	intronic	Intron	-	-	-	-
67DCA	DLBCL	AGGRESSIVE	chr23	24622522	24622522	G	A	SATB1	SNP	intronic	Intron	-	-	-	-
68DBE	DLBCL	AGGRESSIVE	chr2	53516688	53516688	T	C	PIK3R1	SNP	exonic	Silent	ENSCAFT00000068054.1	exon1	c.T199C	p.L67L
68DBE	DLBCL	AGGRESSIVE	chr5	32563056	32563056	G	A	TP53	SNP	exonic	Missense_Mutation	ENSCAFT00000086831.1	exon6	c.C712T	p.R238C
68DBE	DLBCL	AGGRESSIVE	chr8	70767999	70767999	C	T	TRAF3	SNP	exonic	Nonsense_Mutation	ENSCAFT00000028719.4	exon5	c.C547T	p.Q183X
68DBE	DLBCL	AGGRESSIVE	chr8	70789197	70789197	G	A	TRAF3	SNP	exonic	Nonsense_Mutation	ENSCAFT00000085506.1	exon8	c.G1010A	p.W337X
68DBE	DLBCL	AGGRESSIVE	chr14	55598711	55598711	A	G	MET	SNP	UTR5	5'UTR	-	-	-	-
68DBE	DLBCL	AGGRESSIVE	chr19	15162949	15162949	A	C	FAT4	SNP	intronic	Intron	-	-	-	-
68DBE	DLBCL	AGGRESSIVE	chr23	24660451	24660451	G	A	SATB1	SNP	intronic	Intron	-	-	-	-
68DBE	DLBCL	AGGRESSIVE	chr3	21071221	21071221	G	GTAAC	RASA1	NA	UTR3	3'UTR	-	-	-	-
68DBE	DLBCL	AGGRESSIVE	chr6	10217809	10217809	G	A	ARPC1A	SNP	intronic	Intron	-	-	-	-
68DBE	DLBCL	AGGRESSIVE	chr9	22759958	22759958	G	GT	ERBB2	NA	UTR3	3'UTR	-	-	-	-
69CUO	DLBCL	AGGRESSIVE	chr13	25203038	25203038	A	G	MYC	SNP	exonic	Missense_Mutation	ENSCAFT00000001656.4	exon2	c.A211G	p.T71A
69CUO	DLBCL	AGGRESSIVE	chr14	11033743	11033743	T	A	POT1	SNP	exonic	Nonsense_Mutation	ENSCAFT00000080986.1	exon4	c.T69A	p.C23X
69CUO	DLBCL	AGGRESSIVE	chr6	10226256	10226256	C	A	ARPC1A	SNP	exonic	Missense_Mutation	ENSCAFT00000036371.4	exon3	c.G337T	p.V113F
69CUO	DLBCL	AGGRESSIVE	chr2	53516425	53516425	A	T	PIK3R1	SNP	intronic	Intron	-	-	-	-
69CUO	DLBCL	AGGRESSIVE	chr20	57559267	57559267	C	T	CBARP	SNP	UTR3	3'UTR	-	-	-	-
69CUO	DLBCL	AGGRESSIVE	chr8	70766908	70766908	T	TAA	TRAF3	NA	exonic	Frame_Shift_Ins	ENSCAFT00000028719.4	exon4	c.309delinsTAA	p.N104Kfs*9
70CRO	DLBCL	AGGRESSIVE	chr8	70788119	70788119	C	T	TRAF3	SNP	exonic	Nonsense_Mutation	ENSCAFT00000085506.1	exon7	c.C823T	p.Q275X
70CRO	DLBCL	AGGRESSIVE	chr14	55598711	55598711	A	G	MET	SNP	UTR5	5'UTR	-	-	-	-
70CRO	DLBCL	AGGRESSIVE	chr3	21176874	21176874	G	T	CCNH	SNP	intronic	Intron	-	-	-	-
70CRO	DLBCL	AGGRESSIVE	chr34	12600344	12600344	G	A	PIK3CA	SNP	intronic	Intron	-	-	-	-
71COM	DLBCL	AGGRESSIVE	chr13	47452255	47452255	A	G	KDR	SNP	intronic	Intron	-	-	-	-
71COM	DLBCL	AGGRESSIVE	chr3	21071221	21071221	G	GTAAC	RASA1	NA	UTR3	3'UTR	-	-	-	-
71COM	DLBCL	AGGRESSIVE	chr34	12600344	12600344	G	A	PIK3CA	SNP	intronic	Intron	-	-	-	-
71COM	DLBCL	AGGRESSIVE	chr34	40656856	40656856	C	T	TBL1XR1	SNP	UTR5	5'UTR	-	-	-	-
71COM	DLBCL	AGGRESSIVE	chr9	22759958	22759958	G	GT	ERBB2	NA	UTR3	3'UTR	-	-	-	-
71COM	DLBCL	AGGRESSIVE	chrX	35766057	35766057	C	CT	DDX3X	NA	intronic	Intron	-	-	-	-
72CHI	DLBCL	AGGRESSIVE	chr13	25203041	25203041	C	T	MYC	SNP	exonic	Missense_Mutation	ENSCAFT00000001656.4	exon2	c.C214T	p.P72S
72CHI	DLBCL	AGGRESSIVE	chr24	29211682	29211682	G	C	PLCG1	SNP	exonic	Missense_Mutation	ENSCAFT00000014441.2	exon29	c.G3412C	p.V1138L
72CHI	DLBCL	AGGRESSIVE	chr19	15174089	15174089	G	T	FAT4	SNP	intronic	Intron	-	-	-	-
72CHI	DLBCL	AGGRESSIVE	chrUn_JH373333	35871	35871	G	C	NONE
72CHI	DLBCL	AGGRESSIVE	chrUn_AAEX03021268	21858	21858	A	G	NONE
73CAV	DLBCL	AGGRESSIVE	chr8	70789593	70789593	A	C	TRAF3	SNP	exonic	Missense_Mutation	ENSCAFT00000085506.1	exon8	c.A1406C	p.D469A
73CAV	DLBCL	AGGRESSIVE	chr14	55598711	55598711	A	G	MET	SNP	UTR5	5'UTR	-	-	-	-
73CAV	DLBCL	AGGRESSIVE	chr34	12661269	12661269	G	A	PIK3CA	SNP	intronic	Intron	-	-	-	-
73CAV	DLBCL	AGGRESSIVE	chr34	12668786	12668786	T	C	PIK3CA	SNP	intronic	Intron	-	-	-	-
74CAL	DLBCL	AGGRESSIVE	chr34	40582768	40582768	C	G	TBL1XR1	SNP	exonic	Missense_Mutation	ENSCAFT00000024648.5	exon14	c.G1387C	p.D463H
74CAL	DLBCL	AGGRESSIVE	chr9	22763070	22763070	T	G	ERBB2	SNP	exonic	Missense_Mutation	ENSCAFT00000084545.1	exon17	c.A1934C	p.K645T
74CAL	DLBCL	AGGRESSIVE	chrX	35770538	35770538	T	A	DDX3X	SNP	exonic	Missense_Mutation	ENSCAFT00000061818.1	exon9	c.T848A	p.F283Y
74CAL	DLBCL	AGGRESSIVE	chrX	35771170	35771170	G	A	DDX3X	SNP	exonic	Missense_Mutation	ENSCAFT00000061818.1	exon11	c.G1195A	p.G399R
74CAL	DLBCL	AGGRESSIVE	chr14	55598711	55598711	A	G	MET	SNP	UTR5	5'UTR	-	-	-	-
74CAL	DLBCL	AGGRESSIVE	chr34	12600344	12600344	G	A	PIK3CA	SNP	intronic	Intron	-	-	-	-
75BON	DLBCL	AGGRESSIVE	chr15	50416599	50416599	C	A	FBXW7	SNP	exonic	Silent	ENSCAFT00000082966.1	exon1	c.G597T	p.R199R
75BON	DLBCL	AGGRESSIVE	chr15	50190573	50190573	G	A	FBXW7	SNP	intronic	Intron	-	-	-	-
76BOC	DLBCL	AGGRESSIVE	chr13	25203041	25203041	C	T	MYC	SNP	exonic	Missense_Mutation	ENSCAFT00000001656.4	exon2	c.C214T	p.P72S
76BOC	DLBCL	AGGRESSIVE	chr13	47452369	47452369	G	T	KDR	SNP	exonic	Silent	ENSCAFT00000003300.4	exon24	c.C3297A	p.S1099S
76BOC	DLBCL	AGGRESSIVE	chr14	55627044	55627044	C	T	MET	SNP	exonic	Silent	ENSCAFT00000005469.3	exon2	c.C708T	p.F236F
76BOC	DLBCL	AGGRESSIVE	chr8	70789205	70789205	C	T	TRAF3	SNP	exonic	Nonsense_Mutation	ENSCAFT00000085506.1	exon8	c.C1018T	p.R340X
76BOC	DLBCL	AGGRESSIVE	chr6	10214147	10214147	A	T	ARPC1A	SNP	UTR3	3'UTR	-	-	-	-
76BOC	DLBCL	AGGRESSIVE	chr8	70776830	70776831	AG	A	TRAF3	NA	exonic	Frame_Shift_Del	ENSCAFT00000028719.4	exon7	c.669_670delinsA	p.E224Sfs*25
77BIA	DLBCL	AGGRESSIVE	chr14	55626598	55626598	G	A	MET	SNP	exonic	Missense_Mutation	ENSCAFT00000005469.3	exon2	c.G262A	p.E88K
77BIA	DLBCL	AGGRESSIVE	chr34	40595662	40595662	T	G	TBL1XR1	SNP	exonic	Missense_Mutation	ENSCAFT00000024648.5	exon9	c.A847C	p.S283R
77BIA	DLBCL	AGGRESSIVE	chr8	70767969	70767969	C	T	TRAF3	SNP	exonic	Nonsense_Mutation	ENSCAFT00000028719.4	exon5	c.C517T	p.R173X
77BIA	DLBCL	AGGRESSIVE	chrX	35770519	35770519	C	T	DDX3X	SNP	exonic	Missense_Mutation	ENSCAFT00000061818.1	exon9	c.C829T	p.R277W
77BIA	DLBCL	AGGRESSIVE	chr14	55598711	55598711	A	G	MET	SNP	UTR5	5'UTR	-	-	-	-
78BIA	DLBCL	AGGRESSIVE	chr14	55626598	55626598	G	A	MET	SNP	exonic	Missense_Mutation	ENSCAFT00000005469.3	exon2	c.G262A	p.E88K
78BIA	DLBCL	AGGRESSIVE	chr34	40595662	40595662	T	G	TBL1XR1	SNP	exonic	Missense_Mutation	ENSCAFT00000024648.5	exon9	c.A847C	p.S283R
78BIA	DLBCL	AGGRESSIVE	chr8	70767969	70767969	C	T	TRAF3	SNP	exonic	Nonsense_Mutation	ENSCAFT00000028719.4	exon5	c.C517T	p.R173X
78BIA	DLBCL	AGGRESSIVE	chrX	35770519	35770519	C	T	DDX3X	SNP	exonic	Missense_Mutation	ENSCAFT00000061818.1	exon9	c.C829T	p.R277W
78BIA	DLBCL	AGGRESSIVE	chr14	55598711	55598711	A	G	MET	SNP	UTR5	5'UTR	-	-	-	-
79AMA	DLBCL	AGGRESSIVE	chr15	50417188	50417188	C	T	FBXW7	SNP	exonic	Missense_Mutation	ENSCAFT00000082966.1	exon1	c.G8A	p.S3N
79AMA	DLBCL	AGGRESSIVE	chr8	70789358	70789358	T	A	TRAF3	SNP	exonic	Missense_Mutation	ENSCAFT00000085506.1	exon8	c.T1171A	p.F391I
79AMA	DLBCL	AGGRESSIVE	chr9	18292645	18292645	G	T	MAP3K14	SNP	exonic	Missense_Mutation	ENSCAFT00000088008.1	exon5	c.G1160T	p.R387L
79AMA	DLBCL	AGGRESSIVE	chr14	11048813	11048813	T	A	POT1	SNP	intronic	Intron	-	-	-	-
79AMA	DLBCL	AGGRESSIVE	chr14	55598711	55598711	A	G	MET	SNP	UTR5	5'UTR	-	-	-	-
79AMA	DLBCL	AGGRESSIVE	chr6	10214147	10214147	A	T	ARPC1A	SNP	UTR3	3'UTR	-	-	-	-
7DEM	MZL	INDOLENT	chr14	11051373	11051373	A	C	POT1	SNP	exonic	Missense_Mutation	ENSCAFT00000080986.1	exon9	c.A725C	p.Y242S
7DEM	MZL	INDOLENT	chr14	55627538	55627538	C	T	MET	SNP	exonic	Missense_Mutation	ENSCAFT00000005469.3	exon2	c.C1202T	p.A401V
7DEM	MZL	INDOLENT	chr20	41712612	41712612	A	T	SETD2	SNP	exonic	Nonsense_Mutation	ENSCAFT00000021260.4	exon3	c.A2902T	p.R968X
7DEM	MZL	INDOLENT	chr9	18280221	18280221	G	C	MAP3K14	SNP	exonic	Missense_Mutation	ENSCAFT00000021854.4	exon1	c.G4C	p.A2P
7DEM	MZL	INDOLENT	chr27	5522989	5522989	G	A	KMT2D	SNP	intronic	Intron	-	-	-	-
80BER	DLBCL	AGGRESSIVE	chr18	41596256	41596256	G	A	PTPRJ	SNP	exonic	Silent	ENSCAFT00000013154.4	exon20	c.C3156T	p.Y1052Y
80BER	DLBCL	AGGRESSIVE	chr5	32563966	32563966	G	C	TP53	SNP	exonic	Silent	ENSCAFT00000086831.1	exon3	c.C366G	p.R122R
80BER	DLBCL	AGGRESSIVE	chr8	70764058	70764058	C	T	TRAF3	SNP	exonic	Nonsense_Mutation	ENSCAFT00000028719.4	exon3	c.C274T	p.Q92X
80BER	DLBCL	AGGRESSIVE	chrX	35769774	35769774	T	G	DDX3X	SNP	exonic	Missense_Mutation	ENSCAFT00000061818.1	exon8	c.T695G	p.I232R
80BER	DLBCL	AGGRESSIVE	chr15	50214772	50214773	CA	C	FBXW7	NA	intronic	Intron	-	-	-	-
80BER	DLBCL	AGGRESSIVE	chr17	52418940	52418940	A	C	NRAS	SNP	upstream	5'Flank	-	-	-	-
80BER	DLBCL	AGGRESSIVE	chr18	41608747	41608747	A	C	PTPRJ	SNP	intronic	Intron	-	-	-	-
80BER	DLBCL	AGGRESSIVE	chr2	53516425	53516425	A	T	PIK3R1	SNP	intronic	Intron	-	-	-	-
80BER	DLBCL	AGGRESSIVE	chr24	29204139	29204139	G	T	PLCG1	SNP	intronic	Intron	-	-	-	-
80BER	DLBCL	AGGRESSIVE	chr5	32574060	32574060	G	A	TP53	SNP	UTR5	5'UTR	-	-	-	-
80BER	DLBCL	AGGRESSIVE	chr8	70739467	70739467	C	T	TRAF3	SNP	UTR5	5'UTR	-	-	-	-
80BER	DLBCL	AGGRESSIVE	chrX	35766057	35766057	C	CT	DDX3X	NA	intronic	Intron	-	-	-	-
80BER	DLBCL	AGGRESSIVE	chr34	40582882	40582885	TAAC	T	TBL1XR1	NA	exonic	In_Frame_Del	ENSCAFT00000024648.5	exon14	c.1270_1273delinsA	p.V424del
81CAR	DLBCL	AGGRESSIVE	chr13	25203303	25203303	C	T	MYC	SNP	exonic	Missense_Mutation	ENSCAFT00000001656.4	exon2	c.C476T	p.S159L
81CAR	DLBCL	AGGRESSIVE	chr14	11044585	11044585	C	T	POT1	SNP	exonic	Nonsense_Mutation	ENSCAFT00000080986.1	exon7	c.C541T	p.Q181X
81CAR	DLBCL	AGGRESSIVE	chr15	50194595	50194595	C	A	FBXW7	SNP	exonic	Missense_Mutation	ENSCAFT00000012962.5	exon8	c.G1535T	p.R512L
81CAR	DLBCL	AGGRESSIVE	chr34	40657061	40657061	G	A	TBL1XR1	SNP	intronic	Intron	-	-	-	-
82CHO	DLBCL	AGGRESSIVE	chr14	55598711	55598711	A	G	MET	SNP	UTR5	5'UTR	-	-	-	-
82CHO	DLBCL	AGGRESSIVE	chr20	41760720	41760720	C	A	SETD2	SNP	intronic	Intron	-	-	-	-
82CHO	DLBCL	AGGRESSIVE	chr20	57559267	57559267	C	T	CBARP	SNP	UTR3	3'UTR	-	-	-	-
82CHO	DLBCL	AGGRESSIVE	chr9	18280496	18280496	G	A	MAP3K14	SNP	intronic	Intron	-	-	-	-
82CHO	DLBCL	AGGRESSIVE	chr8	70789172	70789172	G	GC	TRAF3	NA	exonic	Frame_Shift_Ins	ENSCAFT00000085506.1	exon8	c.985delinsGC	p.S330Qfs*41
83FRA	DLBCL	AGGRESSIVE	chr13	25203597	25203597	C	T	MYC	SNP	exonic	Missense_Mutation	ENSCAFT00000001656.4	exon2	c.C770T	p.T257I
83FRA	DLBCL	AGGRESSIVE	chr8	70788125	70788125	C	T	TRAF3	SNP	exonic	Nonsense_Mutation	ENSCAFT00000085506.1	exon7	c.C829T	p.R277X
83FRA	DLBCL	AGGRESSIVE	chrX	35770529	35770529	A	G	DDX3X	SNP	exonic	Missense_Mutation	ENSCAFT00000061818.1	exon9	c.A839G	p.D280G
83FRA	DLBCL	AGGRESSIVE	chr14	11061855	11061855	G	T	POT1	SNP	intronic	Intron	-	-	-	-
84MAR	DLBCL	AGGRESSIVE	chr8	70789556	70789556	C	T	TRAF3	SNP	exonic	Nonsense_Mutation	ENSCAFT00000085506.1	exon8	c.C1369T	p.Q457X
84MAR	DLBCL	AGGRESSIVE	chr14	55598711	55598711	A	G	MET	SNP	UTR5	5'UTR	-	-	-	-
84MAR	DLBCL	AGGRESSIVE	chr18	41635323	41635323	G	A	PTPRJ	SNP	upstream	5'Flank	-	-	-	-
84MAR	DLBCL	AGGRESSIVE	chrUn_JH373265	66687	66687	C	T	NONE
85STR	DLBCL	AGGRESSIVE	chr13	25203303	25203303	C	T	MYC	SNP	exonic	Missense_Mutation	ENSCAFT00000001656.4	exon2	c.C476T	p.S159L
85STR	DLBCL	AGGRESSIVE	chr8	70764056	70764056	G	A	TRAF3	SNP	exonic	Missense_Mutation	ENSCAFT00000028719.4	exon3	c.G272A	p.C91Y
85STR	DLBCL	AGGRESSIVE	chr14	55598711	55598711	A	G	MET	SNP	UTR5	5'UTR	-	-	-	-
85STR	DLBCL	AGGRESSIVE	chr34	40738791	40738791	C	T	TBL1XR1	SNP	intronic	Intron	-	-	-	-
85STR	DLBCL	AGGRESSIVE	chr8	70789243	70789243	G	GA	TRAF3	NA	exonic	Frame_Shift_Ins	ENSCAFT00000085506.1	exon8	c.1056delinsGA	p.T354Dfs*17
86BAS	DLBCL	AGGRESSIVE	chr19	15330599	15330599	T	A	FAT4	SNP	exonic	Missense_Mutation	ENSCAFT00000006363.5	exon1	c.A1447T	p.N483Y
86BAS	DLBCL	AGGRESSIVE	chr20	41738144	41738144	A	G	SETD2	SNP	exonic	Missense_Mutation	ENSCAFT00000021260.4	exon12	c.A5623G	p.M1875V
86BAS	DLBCL	AGGRESSIVE	chr27	5534658	5534658	T	A	KMT2D	SNP	exonic	Missense_Mutation	ENSCAFT00000045185.2	exon27	c.T6397A	p.F2133I
86BAS	DLBCL	AGGRESSIVE	chr8	70789271	70789271	T	C	TRAF3	SNP	exonic	Missense_Mutation	ENSCAFT00000085506.1	exon8	c.T1084C	p.F362L
86BAS	DLBCL	AGGRESSIVE	chrX	35770567	35770567	C	CAAGATA	DDX3X	NA	exonic	In_Frame_Ins	ENSCAFT00000061818.1	exon9	c.877delinsCAAGATA	p.D294_T295insKD
87CAS	FL	INDOLENT	chr14	11043296	11043296	T	G	POT1	SNP	exonic	Missense_Mutation	ENSCAFT00000080986.1	exon6	c.T323G	p.L108R
87CAS	FL	INDOLENT	chr8	70767927	70767927	C	T	TRAF3	SNP	exonic	Nonsense_Mutation	ENSCAFT00000028719.4	exon5	c.C475T	p.R159X
87CAS	FL	INDOLENT	chr18	41635323	41635323	G	A	PTPRJ	SNP	upstream	5'Flank	-	-	-	-
88GAL	DLBCL	AGGRESSIVE	chr18	41628565	41628565	A	C	PTPRJ	SNP	exonic	Missense_Mutation	ENSCAFT00000013154.4	exon4	c.T590G	p.V197G
88GAL	DLBCL	AGGRESSIVE	chr19	15159379	15159379	G	A	FAT4	SNP	exonic	Missense_Mutation	ENSCAFT00000059626.1	exon16	c.C14387T	p.A4796V
88GAL	DLBCL	AGGRESSIVE	chr8	70766966	70766966	G	A	TRAF3	SNP	exonic	Missense_Mutation	ENSCAFT00000028719.4	exon4	c.G367A	p.G123S
88GAL	DLBCL	AGGRESSIVE	chr8	70789352	70789352	T	A	TRAF3	SNP	exonic	Missense_Mutation	ENSCAFT00000085506.1	exon8	c.T1165A	p.S389T
88GAL	DLBCL	AGGRESSIVE	chr20	41800403	41800403	A	G	SETD2	SNP	intronic	Intron	-	-	-	-
88GAL	DLBCL	AGGRESSIVE	chr23	24688032	24688034	CAG	C	SATB1	NA	UTR3	3'UTR	-	-	-	-
88GAL	DLBCL	AGGRESSIVE	chr3	21072177	21072177	C	T	CCNH	SNP	intronic	Intron	-	-	-	-
89COS	DLBCL	AGGRESSIVE	chr14	11033690	11033690	C	T	POT1	SNP	exonic	Missense_Mutation	ENSCAFT00000080986.1	exon4	c.C16T	p.R6C
89COS	DLBCL	AGGRESSIVE	chr15	50417171	50417171	G	A	FBXW7	SNP	exonic	Nonsense_Mutation	ENSCAFT00000082966.1	exon1	c.C25T	p.R9X
89COS	DLBCL	AGGRESSIVE	chr9	18280410	18280410	G	A	MAP3K14	SNP	exonic	Missense_Mutation	ENSCAFT00000021854.4	exon1	c.G193A	p.G65S
89COS	DLBCL	AGGRESSIVE	chr14	55598711	55598711	A	G	MET	SNP	UTR5	5'UTR	-	-	-	-
89COS	DLBCL	AGGRESSIVE	chr2	53520325	53520325	C	T	PIK3R1	SNP	intronic	Intron	-	-	-	-
89COS	DLBCL	AGGRESSIVE	chr27	22258077	22258077	A	G	KRAS	SNP	UTR5	5'UTR	-	-	-	-
89COS	DLBCL	AGGRESSIVE	chr5	32565810	32565810	G	A	TP53	SNP	intronic	Intron	-	-	-	-
89COS	DLBCL	AGGRESSIVE	chr6	10217809	10217809	G	A	ARPC1A	SNP	intronic	Intron	-	-	-	-
89COS	DLBCL	AGGRESSIVE	chr6	10226422	10226422	T	C	ARPC1A	SNP	intronic	Intron	-	-	-	-
90CAP	DLBCL	AGGRESSIVE	chr27	5526058	5526058	C	T	KMT2D	SNP	exonic	Missense_Mutation	ENSCAFT00000013872.6	exon10	c.C2641T	p.R881W
91GIA	MZL	INDOLENT	chr15	50417188	50417188	C	T	FBXW7	SNP	exonic	Missense_Mutation	ENSCAFT00000082966.1	exon1	c.G8A	p.S3N
91GIA	MZL	INDOLENT	chr27	5544685	5544685	G	A	KMT2D	SNP	exonic	Silent	ENSCAFT00000045185.2	exon38	c.G13719A	p.T4573T
91GIA	MZL	INDOLENT	chr9	22761282	22761282	G	A	ERBB2	SNP	exonic	Missense_Mutation	ENSCAFT00000084545.1	exon21	c.C2704T	p.L902F
91GIA	MZL	INDOLENT	chrX	35769774	35769774	T	G	DDX3X	SNP	exonic	Missense_Mutation	ENSCAFT00000061818.1	exon8	c.T695G	p.I232R
91GIA	MZL	INDOLENT	chr3	21113700	21113700	C	T	CCNH	SNP	intronic	Intron	-	-	-	-
91GIA	MZL	INDOLENT	chr34	40739158	40739158	G	A	TBL1XR1	SNP	UTR5	5'UTR	-	-	-	-
91GIA	MZL	INDOLENT	chr6	10214147	10214147	A	T	ARPC1A	SNP	UTR3	3'UTR	-	-	-	-
91GIA	MZL	INDOLENT	chr9	22769291	22769291	C	T	ERBB2	SNP	splicing	Splice_Site	-	-	-	-
91GIA	MZL	INDOLENT	chr9	22775989	22775989	C	G	ERBB2	SNP	intronic	Intron	-	-	-	-
91GIA	MZL	INDOLENT	chr34	40582879	40582882	ATCT	A	TBL1XR1	NA	exonic	In_Frame_Del	ENSCAFT00000024648.5	exon14	c.1273_1276delinsT	p.R425del
91GIA	MZL	INDOLENT	chr8	70789482	70789482	A	AC	TRAF3	NA	exonic	Frame_Shift_Ins	ENSCAFT00000085506.1	exon8	c.1295delinsAC	p.N434Qfs*34
92LAI	MZL	INDOLENT	chr15	50192507	50192507	G	A	FBXW7	SNP	exonic	Missense_Mutation	ENSCAFT00000012962.5	exon9	c.C1654T	p.R552C
92LAI	MZL	INDOLENT	chr8	70778590	70778590	C	T	TRAF3	SNP	exonic	Nonsense_Mutation	ENSCAFT00000086511.1	exon7	c.C697T	p.Q233X
93CAR	MZL	INDOLENT	chr15	50417188	50417188	C	T	FBXW7	SNP	exonic	Missense_Mutation	ENSCAFT00000082966.1	exon1	c.G8A	p.S3N
93CAR	MZL	INDOLENT	chr27	5525647	5525647	T	C	KMT2D	SNP	exonic	Missense_Mutation	ENSCAFT00000013872.6	exon10	c.T2230C	p.S744P
93CAR	MZL	INDOLENT	chr27	5525667	5525667	A	G	KMT2D	SNP	exonic	Silent	ENSCAFT00000013872.6	exon10	c.A2250G	p.P750P
93CAR	MZL	INDOLENT	chr27	5525685	5525685	C	T	KMT2D	SNP	exonic	Silent	ENSCAFT00000013872.6	exon10	c.C2268T	p.P756P
93CAR	MZL	INDOLENT	chr13	47183268	47183268	G	A	KIT	SNP	intronic	Intron	-	-	-	-
93CAR	MZL	INDOLENT	chr14	55699306	55699306	G	A	MET	SNP	intronic	Intron	-	-	-	-
93CAR	MZL	INDOLENT	chr6	10212814	10212814	G	A	ARPC1A	SNP	intronic	Intron	-	-	-	-
93CAR	MZL	INDOLENT	chr9	18293155	18293155	G	A	MAP3K14	SNP	intronic	Intron	-	-	-	-
93CAR	MZL	INDOLENT	chrX	35772618	35772618	T	TA	DDX3X	NA	UTR3	3'UTR	-	-	-	-
93CAR	MZL	INDOLENT	chr34	40587295	40587298	CAAG	C	TBL1XR1	NA	exonic	In_Frame_Del	ENSCAFT00000024648.5	exon11	c.971_974delinsG	p.S324del
93CAR	MZL	INDOLENT	chr8	70789146	70789147	AC	A	TRAF3	NA	exonic	Frame_Shift_Del	ENSCAFT00000085506.1	exon8	c.959_960delinsA	p.L321Cfs*15
94GAS	FL	INDOLENT	chr13	25203053	25203053	C	T	MYC	SNP	exonic	Missense_Mutation	ENSCAFT00000001656.4	exon2	c.C226T	p.P76S
94GAS	FL	INDOLENT	chr8	70789197	70789197	G	A	TRAF3	SNP	exonic	Nonsense_Mutation	ENSCAFT00000085506.1	exon8	c.G1010A	p.W337X
94GAS	FL	INDOLENT	chrX	35769842	35769842	G	A	DDX3X	SNP	exonic	Missense_Mutation	ENSCAFT00000061818.1	exon8	c.G763A	p.D255N
94GAS	FL	INDOLENT	chr2	53516367	53516367	G	C	PIK3R1	SNP	intronic	Intron	-	-	-	-
94GAS	FL	INDOLENT	chr20	57578701	57578701	C	T	STK11	SNP	intronic	Intron	-	-	-	-
94GAS	FL	INDOLENT	chr26	37835510	37835510	C	T	PTEN	SNP	upstream	5'Flank	-	-	-	-
94GAS	FL	INDOLENT	chr3	21176220	21176220	C	T	CCNH	SNP	intronic	Intron	-	-	-	-
94GAS	FL	INDOLENT	chr9	22759958	22759958	G	GT	ERBB2	NA	UTR3	3'UTR	-	-	-	-
94GAS	FL	INDOLENT	chr9	22760505	22760506	TA	T	ERBB2	NA	UTR3	3'UTR	-	-	-	-
95CAM	DLBCL	AGGRESSIVE	chr13	25203038	25203038	A	G	MYC	SNP	exonic	Missense_Mutation	ENSCAFT00000001656.4	exon2	c.A211G	p.T71A
95CAM	DLBCL	AGGRESSIVE	chr27	5543213	5543213	G	A	KMT2D	SNP	exonic	Missense_Mutation	ENSCAFT00000045185.2	exon38	c.G12247A	p.A4083T
95CAM	DLBCL	AGGRESSIVE	chr6	10226229	10226229	T	A	ARPC1A	SNP	exonic	Nonsense_Mutation	ENSCAFT00000036371.4	exon3	c.A364T	p.K122X
95CAM	DLBCL	AGGRESSIVE	chr6	10226285	10226285	A	C	ARPC1A	SNP	exonic	Missense_Mutation	ENSCAFT00000036371.4	exon3	c.T308G	p.V103G
95CAM	DLBCL	AGGRESSIVE	chr8	70789205	70789205	C	T	TRAF3	SNP	exonic	Nonsense_Mutation	ENSCAFT00000085506.1	exon8	c.C1018T	p.R340X
95CAM	DLBCL	AGGRESSIVE	chr2	53520325	53520325	C	T	PIK3R1	SNP	intronic	Intron	-	-	-	-
95CAM	DLBCL	AGGRESSIVE	chr9	18280496	18280496	G	A	MAP3K14	SNP	intronic	Intron	-	-	-	-
95CAM	DLBCL	AGGRESSIVE	chr9	22759958	22759958	G	GT	ERBB2	NA	UTR3	3'UTR	-	-	-	-
96FUS	DLBCL	AGGRESSIVE	chr2	53516425	53516425	A	T	PIK3R1	SNP	intronic	Intron	-	-	-	-
96FUS	DLBCL	AGGRESSIVE	chr34	40656856	40656856	C	T	TBL1XR1	SNP	UTR5	5'UTR	-	-	-	-
96FUS	DLBCL	AGGRESSIVE	chr8	70789598	70789605	ATTTTTAT	A	TRAF3	NA	exonic	Frame_Shift_Del	ENSCAFT00000085506.1	exon8	c.1411_1418delinsA	p.F472Kfs*3
97SER	FL	INDOLENT	chr13	25203045	25203045	C	T	MYC	SNP	exonic	Missense_Mutation	ENSCAFT00000001656.4	exon2	c.C218T	p.P73L
97SER	FL	INDOLENT	chr14	11048891	11048891	T	A	POT1	SNP	intronic	Intron	-	-	-	-
97SER	FL	INDOLENT	chr8	70766918	70766920	AAG	A	TRAF3	NA	exonic	Frame_Shift_Del	ENSCAFT00000028719.4	exon4	c.319_321delinsA	p.E109Nfs*11
98CAT	MZL	INDOLENT	chr19	15160794	15160794	G	A	FAT4	SNP	intronic	Intron	-	-	-	-
98CAT	MZL	INDOLENT	chr9	22759958	22759958	G	GT	ERBB2	NA	UTR3	3'UTR	-	-	-	-
98CAT	MZL	INDOLENT	chr20	41712216	41712218	ACT	A	SETD2	NA	exonic	Frame_Shift_Del	ENSCAFT00000021260.4	exon3	c.2506_2508delinsA	p.L837Dfs*10
98CAT	MZL	INDOLENT	chr5	32563786	32563786	A	AG	TP53	NA	exonic	Frame_Shift_Ins	ENSCAFT00000086831.1	exon4	c.465delinsCT	p.P156Sfs*31
99VIN	MZL	INDOLENT	chr14	11043416	11043416	T	C	POT1	SNP	exonic	Missense_Mutation	ENSCAFT00000080986.1	exon6	c.T443C	p.L148S
99VIN	MZL	INDOLENT	chr34	40595655	40595655	C	T	TBL1XR1	SNP	exonic	Missense_Mutation	ENSCAFT00000024648.5	exon9	c.G854A	p.G285E
99VIN	MZL	INDOLENT	chr8	70789352	70789352	T	C	TRAF3	SNP	exonic	Missense_Mutation	ENSCAFT00000085506.1	exon8	c.T1165C	p.S389P
99VIN	MZL	INDOLENT	chr14	55672326	55672326	C	T	MET	SNP	intronic	Intron	-	-	-	-
99VIN	MZL	INDOLENT	chr26	10014408	10014408	G	T	PTPN11	SNP	intronic	Intron	-	-	-	-
99VIN	MZL	INDOLENT	chr20	41712167	41712168	CT	C	SETD2	NA	exonic	Frame_Shift_Del	ENSCAFT00000021260.4	exon3	c.2457_2458delinsC	p.F820Lfs*2
99VIN	MZL	INDOLENT	chr27	5543275	5543275	A	ACAG	KMT2D	NA	exonic	In_Frame_Ins	ENSCAFT00000045185.2	exon38	c.12309delinsACAG	p.Q4109_L4110insQ
99VIN	MZL	INDOLENT	chr34	40582878	40582881	AATC	A	TBL1XR1	NA	exonic	In_Frame_Del	ENSCAFT00000024648.5	exon14	c.1274_1277delinsT	p.R425_L426delinsI
99VIN	MZL	INDOLENT	chr8	70774073	70774073	G	GC	TRAF3	NA	exonic	Frame_Shift_Ins	ENSCAFT00000028719.4	exon6	c.611delinsGC	p.H206Pfs*2
9CRO	MZL	INDOLENT	chr20	41710732	41710732	T	G	SETD2	SNP	exonic	Missense_Mutation	ENSCAFT00000021260.4	exon3	c.T1022G	p.I341S
9CRO	MZL	INDOLENT	chr20	41769101	41769121	GAATGACGTCTCCACTGCCCT	G	SETD2	NA	exonic	Nonsense_Mutation	ENSCAFT00000021260.4	exon15	c.6428_6448delinsG	p.M2144*
9CRO	MZL	INDOLENT	chr8	70789313	70789313	T	C	TRAF3	SNP	exonic	Missense_Mutation	ENSCAFT00000085506.1	exon8	c.T1126C	p.Y376H
9CRO	MZL	INDOLENT	chr24	29201158	29201158	G	A	PLCG1	SNP	intronic	Intron	-	-	-	-
9CRO	MZL	INDOLENT	chr34	12663046	12663046	C	T	PIK3CA	SNP	intronic	Intron	-	-	-	-
9GAL	DLBCL	AGGRESSIVE	chr13	25203303	25203303	C	T	MYC	SNP	exonic	Missense_Mutation	ENSCAFT00000001656.4	exon2	c.C476T	p.S159L
9GAL	DLBCL	AGGRESSIVE	chr14	55693173	55693173	G	A	MET	SNP	exonic	Missense_Mutation	ENSCAFT00000005469.3	exon16	c.G3422A	p.R1141Q
9GAL	DLBCL	AGGRESSIVE	chr15	50194596	50194596	G	A	FBXW7	SNP	exonic	Missense_Mutation	ENSCAFT00000012962.5	exon8	c.C1534T	p.R512C
9GAL	DLBCL	AGGRESSIVE	chr20	41713986	41713986	C	T	SETD2	SNP	exonic	Nonsense_Mutation	ENSCAFT00000021260.4	exon3	c.C4276T	p.R1426X
9GAL	DLBCL	AGGRESSIVE	chr20	57566894	57566894	C	T	STK11	SNP	exonic	Silent	ENSCAFT00000031055.4	exon4	c.G537A	p.P179P
9GAL	DLBCL	AGGRESSIVE	chr26	10017243	10017243	G	A	PTPN11	SNP	exonic	Silent	ENSCAFT00000014133.4	exon4	c.G384A	p.E128E
9GAL	DLBCL	AGGRESSIVE	chr27	5525667	5525667	A	G	KMT2D	SNP	exonic	Silent	ENSCAFT00000013872.6	exon10	c.A2250G	p.P750P
9GAL	DLBCL	AGGRESSIVE	chr14	11043457	11043457	G	A	POT1	SNP	intronic	Intron	-	-	-	-
9GAL	DLBCL	AGGRESSIVE	chr2	53516426	53516426	T	A	PIK3R1	SNP	intronic	Intron	-	-	-	-
9GAL	DLBCL	AGGRESSIVE	chr20	57565975	57565975	G	A	STK11	SNP	intronic	Intron	-	-	-	-
9GAL	DLBCL	AGGRESSIVE	chr9	18292611	18292611	T	A	MAP3K14	SNP	intronic	Intron	-	-	-	-
9GAL	DLBCL	AGGRESSIVE	chr9	18300909	18300909	G	A	MAP3K14	SNP	UTR3	3'UTR	-	-	-	-
