# Supplementary material for: The K9 lymphoma assay allows a genetic subgrouping of canine lymphomas with improved risk classification
Source: Research Square preprint supplement (doi:10.21203/rs.3.rs-3955938/v1), 2024-02-16
Supplement: Supplementary file 8 [file eb006eb0a795ec75fa4e65a8.xlsx]

## Sheet: Index
Supplementary Data 2: survival analysis of 205 dogs with BCL

## Sheet: Whole cohort
Median time to progression (TTP) and lymphoma specific survival (LSS) and survival analysis for 205 dogs with BCL.
Median TTP (days)			p-value			Hazard ratio (95% CI)	Hazard ratio (low)	Hazard ratio (high)			Median LSS (days)			p-value			Hazard ratio (95% CI)	Hazard ratio (low)	Hazard ratio (high)
			Log-rank test	Cox univariate	Cox multivariate									Log-rank test	Cox univariate	Cox multivariate
DIAGNOSIS	B-LL	171	p=0.9								DIAGNOSIS	B-LL	314	p=0.6
	B-SLL	168		0.306		1.737	0.6029	5.003				B-SLL	433		0.675		1.251	0.4384	3.571
	BL	169		0.69		1.233	0.4398	3.458				BL	208		0.304		1.788	0.5907	5.412
	DLBCL	189.5		0.446		1.391	0.5952	3.249				DLBCL	298		0.162		1.84	0.7827	4.325
	FL	190		0.551		1.403	0.4608	4.274				FL	359		0.303		1.84	0.5766	5.87
	MZL	178		0.664		1.218	0.4997	2.97				MZL	298		0.489		1.37	0.5621	3.337
SUBTYPE	Aggressive	187	p=0.9								SUBTYPE	Aggressive	298	p=0.3
	Indolent	178		0.918		0.982	0.6951	1.387				Indolent	345		0.256		0.8085	0.5601	1.167
BREED_CAT	mixed	178	p=0.6								BREED_CAT	mixed	298	p=0.9
	pure	180		0.569		1.113	0.7704	1.608				pure	321		0.934		0.9839	0.6695	1.446
AGE_CAT	old	140	p=0.4								AGE_CAT	old	296	p=0.5
	young	191		0.355		1.181	0.8298	1.682				young	328		0.52		1.122	0.7905	1.592
SEX	f	155.5	p=0.2								SEX	f	227	p=0.8
	fs	202		0.134		0.679	0.4091	1.127				fs	347		0.537		0.8468	0.4998	1.435
	m	193		0.195		0.7216	0.4407	1.181				m	326		0.915		0.9731	0.5907	1.603
	mc	55		0.78		1.0921	0.5892	2.024				mc	154		0.824		1.0772	0.5603	2.071
SEX_CAT	f	187	p=0.8								SEX_CAT	f	345	p=0.5
	m	179		0.795		1.044	0.7568	1.439				m	298		0.536		1.112	0.7938	1.558
WEIGHT_CAT	heavy	180	p=0.9								WEIGHT_CAT	heavy	298	p=0.6
	light	180		0.88		0.9756	0.7078	1.345				light	331		0.635		1.085	0.7747	1.52
STAGE	I	538	p=0.1								STAGE	I	609	p=0.7
	III	202		0.3353		2.848	0.3387	23.94				III	361		0.781		1.347	0.1647	11.02
	IV	78		0.0943		5.563	0.7452	41.52				IV	195		0.508		1.969	0.2643	14.67
	V	194		0.1828		3.854	0.5295	28.05				V	331		0.511		1.938	0.2692	13.95
SUBSTAGE	a	199.5	p=0.05								SUBSTAGE	a	347	p=0.05
	b	158.5		0.0533	0.20862	1.415	0.995	2.011				b	237		0.052	0.0644	1.435	0.9969	2.065
BM_CAT	no	194	p=0.06								BM_CAT	no	347	p=0.07							76
	yes	168		0.0654	0.09411	1.359	0.9806	1.884				yes	263		0.0717	0.2776	1.371	0.9726	1.933
BLOOD_CAT	high	194.5	p=1								BLOOD_CAT	high	311	p=0.5
	low	168		0.959		1.009	0.7271	1.399				low	298		0.524		0.8937	0.6326	1.263
LDH	high	181.5	p=0.4								LDH	high	311	p=0.3
	wnl	178.5		0.375		0.8584	0.6126	1.203				wnl	326		0.259		0.8177	0.5767	1.159
PRE.STEROID	no	190	p=0.1								PRE.STEROID	no	343	p=0.1
	yes	169		0.144		1.329	0.9073	1.948				yes	237		0.147		1.334	0.9034	1.971
TREATMENT	CH	81	p=3e-04								TREATMENT	CH	230	p=2e-04
	CH-IM	202		0.000987	0.00234	0.5673	0.4048	0.7948				CH-IM	352		0.00903	0.0403	0.6308	0.4463	0.8914
	pred	42		0.117223	0.09002	5.0112	0.6671	37.6411				pred	71		0.02881	0.0144	9.8217	1.2665	76.1661
TRAF3	wt	168	p=0.4								TRAF3	wt	331	p=0.4
	mut	194		0.362		0.861	0.6241	1.188				mut	311		0.41		1.153	0.8217	1.618
POT1	wt	160	p=0.2								POT1	wt	298	p=0.6
	mut	226		0.208		0.7997	0.5647	1.133				mut	347		0.618		0.9108	0.631	1.315
FBXW7	wt	175	p=0.5								FBXW7	wt	343	p=0.3
	mut	183.5		0.459		1.146	0.7995	1.642				mut	270		0.33		1.205	0.828	1.755
MYC	wt	178	p=0.8								MYC	wt	311	p=0.5
	mut	190		0.773		1.058	0.7222	1.55				mut	321		0.53		1.133	0.7673	1.673
DDX3X	wt	171	p=0.7								DDX3X	wt	298	p=0.6
	mut	202.5		0.662		1.097	0.7236	1.664				mut	352		0.584		0.8799	0.5567	1.391
SETD2	wt	194	p=0.04								SETD2	wt	345	p=0.4
	mut	123		0.0404	0.00696	1.519	1.019	2.266				mut	169		0.397		1.205	0.7825	1.855
TBL1XR1	wt	173.5	p=0.06								TBL1XR1	wt	296	p=0.2
	mut	206		0.0579	0.07691	0.6479	0.4137	1.015				mut	356		0.237		0.7656	0.492	1.192
KMT2D	wt	190	p=0.4								KMT2D	wt	343	p=0.06
	mut	154		0.433		1.182	0.7782	1.796				mut	195		0.0584	0.7833	1.575	0.9839	2.522
TP53	wt	202	p=1e-04								TP53	wt	347	p=4e-07
	mut	52.5		0.000204	0.00309	2.216	1.456	3.371				mut	108		1.11e-06	4.11e-05	2.87	1.878	4.387
MAP3K14	wt	179.5	p=0.9								MAP3K14	wt	321	p=0.7
	mut	187.5		0.884		0.9646	0.5944	1.565				mut	343		0.69		1.104	0.6794	1.794
ARPC1A	wt	179.5	p=0.3								ARPC1A	wt	311	p=0.9
	mut	197		0.334		0.765	0.4445	1.317				mut	348		0.85		0.9479	0.5444	1.651
FAT4	wt	179	p=0.6								FAT4	wt	311	p=0.7
	mut	194		0.591		1.158	0.6774	1.98				mut	328		0.727		1.104	0.6337	1.923

## Sheet: Aggressive histotypes
Median time to progression (TTP) and lymphoma specific survival (LSS) and survival analysis for 135 dogs with aggressive BCL histotypes.
Median TTP (days)			p-value			Hazard ratio (95% CI)	Hazard ratio (low)	Hazard ratio (high)			Median LSS (days)			p-value			Hazard ratio (95% CI)	Hazard ratio (low)	Hazard ratio (high)
			Log-rank test	Cox univariate	Cox multivariate									Log-rank test	Cox univariate	Cox multivariate
DIAGNOSIS	B-LL	171	0.787114								DIAGNOSIS	B-LL	314	0.302945
	BL	169		0.790852		1.14927	0.411039	3.21336				BL	208		0.234954		2.03754	0.629522	6.59479
	DLBCL	189.5		0.539483		1.30389	0.55864	3.04335				DLBCL	298		0.129249		2.06637	0.809056	5.2776
BREED_CAT	mixed	202.5	0.763789								BREED_CAT	mixed	298	0.724346
	pure	176		0.763835		1.07353	0.675771	1.70541				pure	298		0.724427		0.917247	0.567455	1.48266
AGE_CAT	old	139.5	0.652118								AGE_CAT	old	298	0.353754
	young	202		0.652227		1.10073	0.725126	1.67089				young	298		0.354501		1.22131	0.799891	1.86475
SEX	f	169	0.108753								SEX	f	227	0.502551
	fs	199.5		0.514091		0.819866	0.451478	1.48884				fs	343		0.189348		0.656034	0.349578	1.23114
	m	202		0.255065		0.718993	0.407372	1.26899				m	328		0.148142		0.649941	0.362458	1.16544
	mc	51		0.255318		1.52288	0.737788	3.14342				mc	154		0.470362		0.745781	0.336314	1.65378
SEX_CAT	f	187	0.760923								SEX_CAT	f	298	0.555305
	m	186.5		0.760957		0.941037	0.636164	1.39202				m	298		0.555543		0.884472	0.588047	1.33032
WEIGHT_CAT	heavy	171	0.669975								WEIGHT_CAT	heavy	282	0.50013
	light	202		0.670064		0.91862	0.621661	1.35743				light	328		0.500469		1.1511	0.764424	1.73337
STAGE	III	203	0.00545788								STAGE	III	375	0.278563
	IV	62		0.0305915	0.12021	3.10033	1.11171	8.64616				IV	133		0.117019		2.11608	0.828841	5.40247
	V	202		0.483327	0.72326	1.39261	0.551653	3.51555				V	321		0.240429		1.66369	0.711166	3.89202
SUBSTAGE	a	197	0.393555								SUBSTAGE	a	328	0.596762
	b	179		0.394201		1.20099	0.788083	1.83022				b	237		0.596971		1.12566	0.725857	1.74569
BM_CAT	no	187	0.609672								BM_CAT	no	298	0.356257
	yes	178.5		0.609824		1.10734	0.74854	1.63812				yes	282		0.356991		1.21415	0.803445	1.8348
BLOOD_CAT	high	194.5	0.976192								BLOOD_CAT	high	298	0.445533
	low	171		0.976192		1.00599	0.679394	1.4896				low	298		0.446007		0.85147	0.563089	1.28754
LDH	high	187	0.617025								LDH	high	298	0.465796
	wnl	176		0.61719		0.896541	0.584235	1.37579				wnl	298		0.466257		0.848893	0.546335	1.319
PRE.STEROID	no	197	0.291166								PRE.STEROID	no	340	0.0891584
	yes	171		0.292285		1.26894	0.814566	1.97677				yes	230		0.0912092	0.70391	1.48342	0.938708	2.34422
TREATMENT	CH	79.5	0.00811566								TREATMENT	CH	169	8.35149e-05
	CH-IM	202		0.0214815	0.03077	0.615367	0.406815	0.930831				CH-IM	347		0.00163011	0.01096	0.492039	0.316509	0.764914
	pred	42		0.138684	0.06265	4.66869	0.607303	35.891				pred	71		0.0581732	0.02602	7.45739	0.932815	59.6181
ARPC1A	wt	187	0.532469								ARPC1A	wt	298	0.532526
	mut	153.5		0.533119		0.817793	0.43444	1.53942				mut	249		0.533232		0.80915	0.415647	1.57519
DDX3X	wt	178.5	0.69248								DDX3X	wt	298	0.880091
	mut	202		0.692588		1.09927	0.687585	1.75745				mut	311		0.880099		1.04058	0.620562	1.7449
FAT4	wt	176	0.934976								FAT4	wt	298	0.934785
	mut	215.5		0.934977		1.02552	0.559808	1.87866				mut	356		0.934787		0.974001	0.518231	1.83061
FBXW7	wt	171	0.901402								FBXW7	wt	328	0.582307
	mut	194		0.901405		1.02667	0.677003	1.55694				mut	270		0.582539		1.13088	0.729378	1.7534
KMT2D	wt	199.5	0.0882381								KMT2D	wt	340	0.00229925
	mut	122		0.0909361	0.81668	1.57826	0.929839	2.67887				mut	151		0.0031925	0.40187	2.49084	1.35796	4.56881
MAP3K14	wt	184	0.819701								MAP3K14	wt	298	0.785852
	mut	197		0.819732		0.936048	0.530209	1.65253				mut	263		0.785901		1.08025	0.61891	1.88549
MET	wt	184	0.884646								MET	wt	298	0.94606
	mut	202		0.884667		0.935467	0.379812	2.30403				mut	346		0.946063		0.96591	0.353612	2.63843
MYC	wt	192	0.476459								MYC	wt	298	0.386048
	mut	179		0.476969		1.18332	0.744117	1.88174				mut	263		0.386907		1.2327	0.767443	1.98001
PIK3R1	wt	192	0.071991								PIK3R1	wt	298	0.0324185
	mut	46		0.0818323		2.4576	0.89263	6.76627				mut	106		0.0410834		2.88347	1.04382	7.96535
POT1	wt	160	0.426789								POT1	wt	298	0.564301
	mut	212.5		0.42731		0.845821	0.5594	1.27889				mut	298		0.564559		1.1362	0.735843	1.75438
PTEN	wt	181	0.439157								PTEN	wt	298	0.643729
	mut	237.5		0.442081		0.674697	0.247387	1.8401				mut	351.5		0.64449		0.788444	0.287274	2.16394
PTPRJ	wt	184	0.765108								PTPRJ	wt	298	0.86794
	mut	202		0.765401		1.19234	0.375469	3.78641				mut	328		0.868018		1.12715	0.274713	4.62472
SETD2	wt	202	0.0141236								SETD2	wt	343	0.073577
	mut	130		0.0156457	0.02229	1.85788	1.12428	3.07013				mut	175.5		0.0761903	0.00687	1.59885	0.951783	2.68583
TBL1XR1	wt	171	0.00435174								TBL1XR1	wt	257	0.0406456
	mut	251.5		0.00526197	0.00839	0.445546	0.252516	0.786133				mut	368		0.0430894	0.01648	0.568297	0.328685	0.982587
TP53	wt	202	0.0113974								TP53	wt	343	0.000827103
	mut	52		0.0126966	0.01308	1.86667	1.14258	3.04965				mut	112.5		0.0011337	0.00798	2.26886	1.38537	3.71577
TRAF3	wt	157	0.603737								TRAF3	wt	298	0.721253
	mut	195.5		0.603895		0.901867	0.610491	1.33231				mut	311		0.721314		1.0775	0.714974	1.62385

## Sheet: Indolent histotypes
Median time to progression (TTP) and lymphoma specific survival (LSS) and survival analysis for 70 dogs with indolent BCL histotypes.
Median TTP (days)			p-value			Hazard ratio (95% CI)	Hazard ratio (low)	Hazard ratio (high)			Median LSS (days)			p-value			Hazard ratio (95% CI)	Hazard ratio (low)	Hazard ratio (high)
			Log-rank test	Cox univariate	Cox multivariate									Log-rank test	Cox univariate	Cox multivariate
DIAGNOSIS	B-SLL	168	0.589398								DIAGNOSIS	B-SLL	433	0.815246
	FL	190		0.545044		0.735436	0.271862	1.98949				FL	359		0.524984		1.41095	0.488127	4.07839
	MZL	178		0.306928		0.668438	0.308649	1.44763				MZL	298		0.704449		1.15906	0.540582	2.48516
BREED_CAT	mixed	157	0.507336								BREED_CAT	mixed	331	0.973216
	pure	183		0.508102		1.2495	0.64602	2.41671				pure	345		0.973216		0.988784	0.511848	1.91012
AGE_CAT	old	145.5	0.382653								AGE_CAT	old	296	0.99498
	young	180		0.38394		1.34255	0.691743	2.60564				young	354		0.99498		1.0021	0.521822	1.92441
SEX	f	134	0.161337								SEX	f	433	0.461409
	fs	210		0.0522185	0.421865	0.355915	0.125425	1.00997				fs	364		0.516919		1.40481	0.502575	3.92674
	m	179		0.401488	0.61507	0.646834	0.233762	1.78983				m	326		0.178032		2.01757	0.726494	5.60306
	mc	111.5		0.24413	0.164714	0.476194	0.136637	1.65958				mc	200		0.241592		2.05037	0.616466	6.81957
SEX_CAT	f	184	0.252227								SEX_CAT	f	364	0.13553
	m	168		0.254452		1.40804	0.781657	2.53638				m	254		0.138853	0.3638	1.58531	0.861226	2.91816
WEIGHT_CAT	heavy	209	0.698651								WEIGHT_CAT	heavy	354	0.845161
	light	168		0.698813		1.12581	0.61768	2.05196				light	331		0.845185		1.06361	0.572715	1.97529
STAGE	I	538	0.279234								STAGE	I	609	0.826058
	III	117		0.0939113		11.7282	0.657932	209.067				III	347		0.59606		2.13228	0.129699	35.0552
	IV	168		0.270705		3.27452	0.396703	27.0291				IV	200		0.8411		1.24213	0.149137	10.3454
	V	179.5		0.145904		4.65187	0.585832	36.9388				V	345		0.594161		1.72323	0.232785	12.7564
SUBSTAGE	a	209	0.00916578								SUBSTAGE	a	385	0.00614699
	b	106.5		0.0111969	0.010494	2.32756	1.2117	4.47103				b	215		0.00787614	0.0409	2.53258	1.27617	5.02594
BM_CAT	no	211.5	0.011751								BM_CAT	no	364	0.107732
	yes	134		0.0137127	0.016335	2.12461	1.16687	3.86843				yes	215		0.111247	0.3944	1.65328	0.890505	3.06941
BLOOD_CAT	high	201.5	0.801903								BLOOD_CAT	high	385	0.888863
	low	168		0.801948		1.07976	0.592787	1.96679				low	298		0.888872		1.04598	0.556745	1.96514
LDH	high	168	0.644863								LDH	high	331	0.588484
	wnl	178.5		0.645106		0.871337	0.484896	1.56576				wnl	347		0.588909		0.845533	0.460098	1.55386
PRE.STEROID	no	180	0.262802								PRE.STEROID	no	347	0.985306
	yes	133.5		0.266557		1.55192	0.714754	3.36961				yes	254		0.985306		1.00731	0.46396	2.18699
TREATMENT	CH	168	0.0176545								TREATMENT	CH	298	0.398392
	CH-IM	211		0.0199747	0.002526	0.482382	0.261036	0.891419				CH-IM	354		0.399697		0.770283	0.419616	1.414
ARPC1A	wt	178	0.548104								ARPC1A	wt	345	0.623437
	mut	201.5		0.549599		0.725286	0.25328	2.07691				mut	364		0.624411		1.29693	0.458038	3.67222
DDX3X	wt	168	0.943114								DDX3X	wt	298	0.189039
	mut	209		0.943116		0.965922	0.372666	2.50359				mut	385		0.197447	0.4868	0.505967	0.179549	1.42581
ERBB2	wt	178.5	0.396312								ERBB2	wt	345	0.681645
	mut	133		0.410347		2.33737	0.309677	17.6419				mut	331		0.683813		1.51751	0.203911	11.2933
FAT4	wt	179.5	0.2165								FAT4	wt	345	0.515023
	mut	168		0.227247		2.11678	0.626678	7.14999				mut	211		0.517707		1.48122	0.450472	4.87047
FBXW7	wt	179.5	0.208322								FBXW7	wt	347	0.352112
	mut	168		0.212529	0.926355	1.6148	0.760177	3.43024				mut	195		0.354575		1.42405	0.673734	3.00996
KMT2D	wt	179	0.473166								KMT2D	wt	354	0.832566
	mut	162.5		0.474411		0.763834	0.365106	1.59801				mut	211		0.832613		1.08733	0.500237	2.36344
KRAS	wt	173	0.621893								KRAS	wt	331	0.992907
	mut	280		0.625433		0.608738	0.0829712	4.46616				mut	345		0.992907		1.00913	0.136096	7.48254
MAP3K14	wt	173.5	0.84851								MAP3K14	wt	331	0.979713
	mut	178		0.848562		1.09554	0.429409	2.79504				mut	399		0.979713		0.986611	0.349083	2.78845
MET	wt	178	0.963581								MET	wt	345	0.697959
	mut	208.5		0.963583		1.03384	0.247774	4.31369				mut	299.5		0.698915		1.32733	0.316087	5.57379
MYC	wt	168	0.658313								MYC	wt	326	0.90964
	mut	210		0.658623		0.857447	0.433415	1.69633				mut	385		0.909645		0.960517	0.479024	1.92598
POT1	wt	162.5	0.23588								POT1	wt	296	0.131456
	mut	239		0.238679		0.677137	0.354019	1.29517				mut	433		0.136037	0.7689	0.580238	0.283661	1.1869
SETD2	wt	179	0.944952								SETD2	wt	345	0.612519
	mut	91.5		0.944953		1.02634	0.490677	2.14677				mut	156		0.613047		0.81514	0.369156	1.79992
TBL1XR1	wt	178	0.224681								TBL1XR1	wt	331	0.414615
	mut	168		0.229323		1.63755	0.732762	3.65953				mut	347		0.416736		1.39836	0.622547	3.14099
TP53	wt	188	0.000130517								TP53	wt	359	4.47141e-07
	mut	78		0.000555804	0.000151	5.11251	2.02453	12.9105				mut	105		2.25463e-05	3.25e-05	8.39154	3.13758	22.4434
TRAF3	wt	168	0.404132								TRAF3	wt	347	0.43412
	mut	190		0.405283		0.781162	0.436652	1.39748				mut	326		0.435197		1.27593	0.691865	2.35305

## Sheet: DLBCL
Median time to progression (TTP) and lymphoma specific survival (LSS) and survival analysis for 117 dogs with DLBCL.
Median TTP (days)			p-value			Hazard ratio (95% CI)	Hazard ratio (low)	Hazard ratio (high)			Median LSS (days)			p-value			Hazard ratio (95% CI)	Hazard ratio (low)	Hazard ratio (high)
			Log-rank test	Cox univariate	Cox multivariate									Log-rank test	Cox univariate	Cox multivariate
BREED_CAT	mixed	207.5	0.303097								BREED_CAT	mixed	352	0.733081
	pure	173.5		0.304314		1.29484	0.790874	2.11993				pure	298		0.733162		1.09245	0.657104	1.81622
AGE_CAT	old	97	0.657416								AGE_CAT	old	296	0.824172
	young	203		0.657534		0.904949	0.581907	1.40732				young	321		0.82419		0.951106	0.611164	1.48013
SEX	f	170	0.334161								SEX	f	228.5	0.37643
	fs	197		0.773688		0.911765	0.485786	1.71128				fs	311		0.664333		0.866462	0.453507	1.65545
	m	202		0.446666		0.792822	0.436009	1.44163				m	328		0.133048		0.620124	0.332444	1.15675
	mc	51		0.311695		1.48937	0.688391	3.22233				mc	168		0.264571		0.609839	0.25579	1.45394
SEX_CAT	f	187	0.819852								SEX_CAT	f	298	0.0903153
	m	192		0.81987		0.951597	0.620862	1.45852				m	321		0.0921753	0.443	0.676874	0.429779	1.06603
WEIGHT_CAT	heavy	173.5	0.864893								WEIGHT_CAT	heavy	282	0.324116
	light	202		0.864901		0.9633	0.62618	1.48192				light	328		0.325096		1.25171	0.800386	1.95754
STAGE	III	203	0.0415165								STAGE	III	375	0.180223
	IV	63		0.647123		1.29712	0.425839	3.95105				IV	182		0.121986	0.1254	2.42739	0.788911	7.46882
	V	197		0.396929		0.641846	0.230085	1.7905				V	328		0.416225	0.2547	1.52399	0.551884	4.20836
SUBSTAGE	a	199.5	0.49204								SUBSTAGE	a	328	0.259361
	b	179		0.492528		1.18085	0.734541	1.89834				b	237		0.260882		1.32279	0.812272	2.15416
BM_CAT	no	198	0.398663								BM_CAT	no	347	0.365217
	yes	176		0.399299		1.20057	0.784843	1.83652				yes	282		0.366017		1.22543	0.788607	1.90422
BLOOD_CAT	high	181	0.829647								BLOOD_CAT	high	270	0.336578
	low	190.5		0.829661		0.954306	0.623213	1.4613				low	340		0.337486		0.805985	0.518693	1.2524
LDH	high	190.5	0.891049								LDH	high	298	0.792692
	wnl	176		0.891054		0.966938	0.597668	1.56436				wnl	298		0.792727		0.936551	0.574366	1.52712
PRE.STEROID	no	194	0.438919								PRE.STEROID	no	321	0.484092
	yes	187		0.439637		1.21732	0.739269	2.00451				yes	263		0.484678		1.19927	0.7204	1.99646
TREATMENT	CH	98	0.0483744								TREATMENT	CH	230	0.000834871
	CH-IM	199.5		0.319006	0.3665	0.787649	0.492533	1.25959				CH-IM	343		0.0281118	0.1492	0.583493	0.360739	0.943797
	pred	42		0.0837337	0.0234	6.22939	0.783602	49.5216				pred	71		0.0435781	0.0119	8.82456	1.06477	73.136
ARPC1A	wt	192	0.652058								ARPC1A	wt	311	0.82899
	mut	81		0.652399		1.17277	0.5862	2.34629				mut	150		0.829035		1.08429	0.520179	2.26015
DDX3X	wt	173.5	0.857196								DDX3X	wt	296	0.61619
	mut	210		0.857209		0.954746	0.576509	1.58114				mut	340		0.616476		0.868937	0.501458	1.50571
FAT4	wt	173.5	0.550374								FAT4	wt	296	0.404167
	mut	228		0.551036		0.817265	0.420984	1.58657				mut	368		0.405809		0.743407	0.3695	1.49568
FBXW7	wt	171	0.70266								FBXW7	wt	340	0.445464
	mut	194		0.702747		1.09189	0.695164	1.71504				mut	270		0.446083		1.20088	0.749904	1.92306
KMT2D	wt	202	0.168859								KMT2D	wt	343	0.00460252
	mut	122		0.171531	0.8961	1.48456	0.842598	2.61561				mut	169		0.00604212	0.4309	2.43642	1.2902	4.60097
MAP3K14	wt	189.5	0.274133								MAP3K14	wt	311	0.295426
	mut	130		0.276164		1.37768	0.77394	2.45237				mut	263		0.297312		1.36009	0.762754	2.42521
MET	wt	187	0.813185								MET	wt	298	0.877226
	mut	202		0.813275		0.896477	0.362009	2.22003				mut	346		0.877258		0.923516	0.336452	2.53492
MYC	wt	186.5	0.626856								MYC	wt	298	0.744843
	mut	195		0.627063		1.12918	0.691696	1.84337				mut	321		0.744913		1.08634	0.659625	1.78911
PIK3R1	wt	192	0.203488								PIK3R1	wt	311	0.107116
	mut	51		0.213758		2.092	0.653463	6.69737				mut	100		0.119874		2.52237	0.786061	8.09394
POT1	wt	160	0.129543								POT1	wt	298	0.998834
	mut	226		0.131333	0.1943	0.706073	0.449273	1.10966				mut	345		0.998834		1.00035	0.628782	1.59148
PTEN	wt	184	0.33586								PTEN	wt	298	0.490096
	mut	237.5		0.340543		0.61079	0.221613	1.68341				mut	351.5		0.492159		0.696829	0.248597	1.95324
PTPRJ	wt	189.5	0.760416								PTPRJ	wt	298	0.40593
	mut	165.5		0.760879		1.24474	0.30391	5.09814				mut	248.5		0.412748		1.80763	0.438398	7.4533
SETD2	wt	202	0.00990305								SETD2	wt	345	0.087672
	mut	101		0.0113685	0.0198	2.00003	1.16932	3.42089				mut	175.5		0.0903683	0.02	1.58056	0.930492	2.68477
TBL1XR1	wt	178.5	0.0796287								TBL1XR1	wt	263	0.172862
	mut	215.5		0.0826245	0.1248	0.596111	0.332368	1.06914				mut	356		0.175615	0.2017	0.669223	0.374239	1.19672
TP53	wt	202	0.0156075								TP53	wt	343	0.000859696
	mut	52.5		0.0175327	0.0599	1.96251	1.12513	3.4231				mut	117		0.00127458	0.0447	2.51508	1.43505	4.40795
TRAF3	wt	157	0.12441								TRAF3	wt	298	0.700549
	mut	197		0.126207	0.2361	0.708001	0.454808	1.10215				mut	311		0.700642		0.914692	0.580568	1.44111

## Sheet: MZL
Median time to progression (TTP) and lymphoma specific survival (LSS) and survival analysis for 38 dogs with MZL.
Median TTP (days)			p-value			Hazard ratio (95% CI)	Hazard ratio (low)	Hazard ratio (high)			Median LSS (days)			p-value			Hazard ratio (95% CI)	Hazard ratio (low)	Hazard ratio (high)
			Log-rank test	Cox univariate	Cox multivariate									Log-rank test	Cox univariate	Cox multivariate
BREED_CAT	mixed	167.5	0.279535								BREED_CAT	mixed	298	0.978893
	pure	179		0.282857		1.53094	0.703718	3.33058				pure	254		0.978894		1.01067	0.460387	2.21869
AGE_CAT	old	166.5	0.186019								AGE_CAT	old	211	0.941171
	young	178		0.189995		1.71611	0.765223	3.84858				young	326		0.941173		0.970845	0.442448	2.13028
SEX	f	134	0.163434								SEX	f	215	0.583104
	fs	247		0.0800824		0.279222	0.0669111	1.1652				fs	609		0.888203		1.10317	0.280626	4.33666
	m	133		0.463853		0.61705	0.169547	2.24569				m	254		0.327151		1.88145	0.531427	6.66104
	mc	357		0.14775		0.28066	0.0502354	1.56801				mc	560		0.87355		1.14079	0.225263	5.7773
SEX_CAT	f	178	0.332153								SEX_CAT	f	298	0.268165
	m	156		0.334806		1.45099	0.680986	3.09166				m	254		0.271705		1.56309	0.704819	3.46648
WEIGHT_CAT	heavy	182.5	0.627542								WEIGHT_CAT	heavy	326	0.727457
	light	134		0.628012		0.831611	0.394447	1.75328				light	215		0.727649		1.1443	0.535902	2.44339
STAGE	I	538	0.24942								STAGE	I	609	0.318714
	IV	101.5		0.476258		2.28588	0.235034	22.232				IV	211		0.75723		0.694529	0.0688548	7.00561
	V	178.5		0.16185		4.63318	0.54065	39.7048				V	298		0.605303		1.70407	0.225712	12.8653
SUBSTAGE	a	244	0.00962269								SUBSTAGE	a	399	0.0100728
	b	80		0.0122964	0.10383	2.697	1.24037	5.8642				b	180		0.0130225	0.073247	2.76555	1.23903	6.17279
BM_CAT	no	213	0.0319363								BM_CAT	no	385	0.0417
	yes	55.5		0.03639	0.02038	2.22608	1.05201	4.71044				yes	172		0.0465123	0.074399	2.24058	1.01254	4.95802
BLOOD_CAT	high	213	0.871478								BLOOD_CAT	high	215	0.803301
	low	167.5		0.871497		0.939436	0.440663	2.00275				low	298		0.80338		0.903877	0.407942	2.00272
LDH	high	106.5	0.497262								LDH	high	211	0.501764
	wnl	179		0.498334		0.776475	0.373329	1.61497				wnl	326		0.502929		0.769815	0.358076	1.655
PRE.STEROID	no	198	0.209215								PRE.STEROID	no	326	0.994212
	yes	133		0.214774		1.73983	0.725311	4.1734				yes	254		0.994212		1.00321	0.421859	2.38571
TREATMENT	CH	60	0.018								TREATMENT	CH	211	0.133561
	CH-IM	226		0.0219166	0.02049	0.397181	0.180319	0.874853				CH-IM	354		0.138834	0.11932	0.555202	0.254719	1.21016
ARPC1A	wt	178	0.49249								ARPC1A	wt	298	0.853562
	mut	269.5		0.496389		0.594004	0.132421	2.66453				mut	609		0.853674		1.14696	0.267143	4.92436
BRAF	wt	167.5	0.794069								BRAF	wt	298	0.662584
	mut	179		0.794672		1.30823	0.172952	9.89554				mut	254		0.665222		1.56649	0.205121	11.9631
DDX3X	wt	145.5	0.920578								DDX3X	wt	215	0.184215
	mut	213		0.920591		0.939862	0.277645	3.18155				mut	385		0.200314		0.388646	0.0914942	1.65088
ERBB2	wt	178.5	0.512312								ERBB2	wt	254	0.901607
	mut	133		0.520123		1.95429	0.253643	15.0576				mut	331		0.901673		1.13601	0.150243	8.58958
FAT4	wt	178.5	0.307661								FAT4	wt	298	0.508926
	mut	78		0.328846		2.80068	0.354398	22.1327				mut	211		0.516899		1.96534	0.254728	15.1635
FBXW7	wt	194.5	0.222299								FBXW7	wt	298	0.576494
	mut	157		0.227786	0.34935	1.72665	0.710773	4.1945				mut	188		0.577459		1.28332	0.53357	3.08661
KMT2D	wt	179	0.651635								KMT2D	wt	326	0.889004
	mut	118.5		0.65213		0.821489	0.349396	1.93146				mut	199.5		0.889023		1.06714	0.428356	2.65853
MAP3K14	wt	168	0.758034								MAP3K14	wt	298	0.818893
	mut	178		0.758262		1.16595	0.438576	3.09965				mut	307		0.819009		1.13392	0.386406	3.32754
MET	wt	167.5	0.8517								MET	wt	254	0.857762
	mut	249		0.851923		0.825603	0.110376	6.17543				mut	399		0.857959		0.831762	0.110635	6.25324
MYC	wt	157	0.626448								MYC	wt	254	0.945473
	mut	211.5		0.627148		0.799326	0.323757	1.97346				mut	341.5		0.945475		0.968659	0.388906	2.41266
PLCG1	wt	167.5	0.935305								PLCG1	wt	254	0.742188
	mut	210		0.935324		1.08713	0.144542	8.17649				mut	298		0.743372		1.40347	0.184485	10.6769
POT1	wt	133.5	0.465538								POT1	wt	215	0.251678
	mut	249		0.467003		0.744573	0.336316	1.64842				mut	399		0.256483		0.605826	0.254924	1.43974
PTPRJ	wt	168	0.723457								PTPRJ	wt	254	0.608456
	mut	178		0.724913		1.43898	0.189558	10.9236				mut	680		0.61243		0.593818	0.0790614	4.46008
SETD2	wt	182.5	0.726445								SETD2	wt	326	0.742733
	mut	60		0.726664		1.15738	0.510012	2.62645				mut	156		0.742929		0.86279	0.357173	2.08416
STK11	wt	167.5	0.476063								STK11	wt	254	0.776256
	mut	357		0.485239		0.488357	0.0652524	3.65492				mut	560		0.777019		0.747252	0.0994907	5.61244
TBL1XR1	wt	178	0.536566								TBL1XR1	wt	298	0.843026
	mut	168		0.538557		1.41437	0.468518	4.26972				mut	254		0.843105		1.11883	0.368013	3.40147
TP53	wt	198	0.00187516								TP53	wt	331	0.000301857
	mut	78		0.00528112	0.00241	5.2112	1.63372	16.6226				mut	105		0.00152489	0.000823	6.2878	2.01736	19.5981
TRAF3	wt	134	0.687458								TRAF3	wt	254	0.671327
	mut	198		0.68772		0.862676	0.419791	1.77281				mut	298		0.671656		1.17972	0.549391	2.53324
