# Supplementary material for: The K9 lymphoma assay allows a genetic subgrouping of canine lymphomas with improved risk classification
Source: Research Square preprint supplement (doi:10.21203/rs.3.rs-3955938/v1), 2024-02-16
Supplement: Supplementary file 9 [file f19e50dd809f16a70edd8e0d.xlsx]

## Sheet: Foglio1
Supplementary Data 8: association between recurrently mutated genes and TMB in dogs with BCL
Gene	0 shapiro	1 shapiro	0 mean	1 mean	var_test_p-value	p-value	statistic	test_used	pAdj
FBXW7	3.96907e-07	0.033105	NA	NA	0.521916	7.64506e-07	5405	Wilcoxon rank	9.17407e-06
TRAF3	4.19633e-06	0.000239264	NA	NA	0.729469	7.19789e-06	6217.5	Wilcoxon rank	4.31873e-05
SETD2	4.49634e-07	0.168422	NA	NA	0.546504	1.71008e-05	4359	Wilcoxon rank	5.25842e-05
FAT4	1.35362e-07	0.0213538	NA	NA	0.915093	1.75281e-05	2711	Wilcoxon rank	5.25842e-05
DDX3X	2.60928e-07	0.00484889	NA	NA	0.250849	2.6469e-05	4329	Wilcoxon rank	6.35255e-05
POT1	4.22005e-07	0.0297896	NA	NA	0.694454	3.75005e-05	5525.5	Wilcoxon rank	7.5001e-05
KMT2D	4.92759e-07	0.255715	NA	NA	0.329731	0.00119132	3472.5	Wilcoxon rank	0.00204226
TBL1XR1	6.83584e-07	0.00353643	NA	NA	0.659574	0.0410098	3275.5	Wilcoxon rank	0.0615148
ARPC1A	2.3278e-07	0.0744252	NA	NA	0.368985	0.0613807	2152	Wilcoxon rank	0.0818409
TP53	5.40054e-07	0.0268047	NA	NA	0.994429	0.152509	2893.5	Wilcoxon rank	0.183011
MYC	1.871e-06	0.00315808	NA	NA	0.269183	0.341099	3612.5	Wilcoxon rank	0.372108
MAP3K14	1.12347e-06	0.00421894	NA	NA	0.477126	0.833245	2141.5	Wilcoxon rank	0.833245
