# Supplementary material for: The K9 lymphoma assay allows a genetic subgrouping of canine lymphomas with improved risk classification
Source: Research Square preprint supplement (doi:10.21203/rs.3.rs-3955938/v1), 2024-02-16
Supplement: Supplementary file 10 [file f45944edf9cb928e8a4b3044.xlsx]

## Sheet: Foglio1
Supplementary Data 4: in silico validation of the K9 lymphoma assay on 77 cDLBCL previously analyzed by WES
	Genes of the K9 lymphoma panel
WES sample ID	ARPC1A	BRAF	DDX3X	FAT4	FBXW7	GNB1	ERBB2	KDR	KIT	KMT2D	KRAS	MAP3K14	MET	MYC	NRAS	ORC1	PIK3CA	PIK3R1	PLCG1	POT1	PSMA1	PTEN	PTPN11	PTPRJ	RASA1	SATB1	SETD2	STK11	TBL1XR1	TP53	TRAF3
1
2			X		X							X		X						X							X		X	X	X
3					X							X		X						X							X		X	X	X
4			X
5			X		X							X		X						X							X		X	X	X
6					X							X		X						X		X					X		X	X	X
7			X
8
9
10																						X
11					X							X		X						X							X		X	X	X
12
13
14					X							X		X						X							X		X	X	X
15
16					X							X		X						X							X		X	X	X
17
18
19
20
21			X		X							X		X						X							X		X	X	X
22
23
24					X							X		X						X							X		X	X	X
25					X							X		X						X							X		X	X	X
26					X							X		X						X							X		X	X	X
27									X									X				X
28			X		X							X		X						X							X		X	X	X
29
30					X							X		X						X							X		X	X	X
31			X		X							X		X						X							X		X	X	X
32					X							X		X						X							X		X	X	X
33
34					X							X		X						X							X		X	X	X
35			X		X							X		X						X							X		X	X	X
36					X							X		X						X							X		X	X	X
37					X							X		X						X							X		X	X	X
38
39					X							X		X						X							X		X	X	X
40
41					X							X		X						X							X		X	X	X
42					X							X		X						X							X		X	X	X
43
44
45
46
47					X							X		X						X							X		X	X	X
48					X							X		X						X							X		X	X	X
49					X							X		X						X							X		X	X	X
50					X							X		X						X							X		X	X	X
51
52					X							X		X						X							X		X	X	X
53
54					X							X		X						X							X		X	X	X
55	X				X							X		X						X							X		X	X	X
56
57					X							X		X						X							X		X	X	X
58
59			X
60					X							X		X						X							X		X	X	X
61
62
63					X							X		X						X							X		X	X	X
64					X							X		X						X							X		X	X	X
65			X		X							X		X						X							X		X	X	X
66
67
68
69			X		X							X		X						X							X		X	X	X
70					X							X		X						X							X		X	X	X
71			X		X							X		X						X					X		X		X	X	X
72					X							X		X						X							X		X	X	X
73					X							X		X						X							X		X	X	X
74					X							X		X						X							X		X	X	X
75
76			X		X							X		X						X							X		X	X	X
77
